# Supplementary material for: Unexpected Vulnerability of DPEphos to C−O Activation in the Presence of Nucleophilic Metal Hydrides
Source: PubMed Central journal article supplement (PMC7496192; doi:10.1002/chem.202001685), 2020-07-28
Supplement: CHEM-26-11141-s001.pdf [file CHEM-26-11141-s001.pdf]

# Chemistry—A European Journal

Supporting Information

## Unexpected Vulnerability of DPEphos to C—O Activation in the Presence of Nucleophilic Metal Hydrides

Mateusz K. Cybulski,<sup>[a]</sup> Nicholas A. Beattie,<sup>[b]</sup> Stuart A. Macgregor,<sup>\*[b]</sup> Mary F. Mahon,<sup>[a]</sup> and Michael K. Whittlesey<sup>\*[a]</sup>



**General Comments.** All manipulations were carried out using standard Schlenk, high vacuum and glovebox techniques using dry and degassed solvents.  $[\text{Ru}(\text{IME}_4)_2(\text{PPh}_3)_2\text{H}_2]$  (**1**),  $[\text{Ru}(\text{IEt}_2\text{Me}_2)_2(\text{PPh}_3)_2\text{H}_2]$  (**3**) and  $[\text{Ru}(\text{PPh}_3)_4\text{H}_2]$  were prepared according to the literature.<sup>[1,2]</sup> DPEphos (Strem) was used as received. NMR spectra were recorded in  $[\text{D}_6]$ benzene (vacuum transferred from potassium) on Bruker Avance 500 and 400 MHz NMR spectrometers and referenced to  $\delta = 7.15$  ppm ( $^1\text{H}$ ) and  $\delta = 128.0$  ppm ( $^{13}\text{C}$ ).  $^{31}\text{P}$  spectra were referenced to  $\text{H}_3\text{PO}_4$  at  $\delta = 0.0$  ppm; spectra were also recorded in  $[\text{D}_8]$ toluene (vacuum transferred from potassium) for VT NMR studies of **6** or recorded unlocked in  $\text{CH}_2\text{Cl}_2$  in the case of **7**. Elemental analyses were performed by Elemental Microanalysis Ltd, Okehampton, Devon, UK.

**$[\text{Ru}(\text{IME}_4)_2(\text{PPh}_3)(\text{Ph}_2\text{PC}_6\text{H}_4\text{O})\text{H}]$  (**2**).** A 0.4 mL  $\text{C}_6\text{H}_6$  solution of **1** (29.5 mg, 0.034 mmol) and DPEphos (22 mg, 0.040 mmol) was heated at 90 °C overnight in a J. Young's resealable NMR tube.<sup>‡</sup> Subsequent addition of pentane resulted in precipitation of a pale yellow solid, which was further washed with pentane (3 x 0.5 mL) and dried in vacuo. A concentrated (0.2 mL) toluene solution of the solid was layered with pentane to afford **2** as yellow crystals. Yield: 13 mg (43%).  $^1\text{H}$  NMR ( $[\text{D}_6]$ benzene, 500 MHz, 298 K):  $\delta = 7.77$  (s, 6H, s, ArH), 7.52 (m, 1H, ArH), 7.39 (m, 1H, ArH), 7.32 (s, 4H, ArH), 6.96 (s, 10H, ArH), 6.86 (m, 2H, ArH), 6.80 (m, 4H, ArH), 6.50 (m, 1H, ArH), 3.79 (s, 6H,  $\text{NCH}_3$ ), 3.03 (s, 6H,  $\text{NCH}_3$ ), 1.34 (s, 6H,  $\text{CH}_3$ ), 1.23 (s, 3H,  $\text{CH}_3$ ), -18.40 (t,  $^2J(\text{H},\text{P}) = 22.0$  Hz, 1H, RuH) ppm;  $^{31}\text{P}\{^1\text{H}\}$  NMR ( $[\text{D}_6]$ benzene, 202 MHz, 298 K):  $\delta = 51.3$  (app s, presumably overlapping signals for  $\text{P}_1$  and  $\text{P}_2$ ) ppm;  $^{13}\text{C}\{^1\text{H}\}$  NMR ( $[\text{D}_6]$ benzene, 126 MHz, 298 K):  $\delta = 192.1$  (t,  $^2J(\text{C},\text{P}) = 15$  Hz, NCN), 178.4 (dd,  $^2J(\text{C},\text{P}) = 14$  Hz,  $^3J(\text{C},\text{P}) = 12$  Hz, OAr), 143.1 (dd,  $J(\text{C},\text{P}) = 17$  Hz,  $J(\text{C},\text{P}) = 14$  Hz, Ar), 141.5 (dd,  $J(\text{C},\text{P}) = 18$  Hz,  $J(\text{C},\text{P}) = 15$  Hz, Ar), 135.3 (s, Ar), 134.5 (t,  $J(\text{C},\text{P}) = 6$  Hz, Ar), 132.6 (t,  $J(\text{C},\text{P}) = 6$  Hz, Ar), 131.1 (s, Ar), 127.4 (s, Ar), 126.7 (m, Ar), 123.3 (s,  $\text{NCCH}_3$ ), 123.2 (s,  $\text{NCCH}_3$ ), 121.4 (t,  $J(\text{C},\text{P}) = 3$  Hz, Ar), 111.5 (t,  $J(\text{C},\text{P}) =$

2 Hz, Ar), 35.1 (s, NCH<sub>3</sub>), 22.0 (s, NCH<sub>3</sub>), 10.1 (s, CH<sub>3</sub>), 8.8 (s, CH<sub>3</sub>) ppm; elemental analysis (%) calcd for C<sub>50</sub>H<sub>54</sub>N<sub>4</sub>OP<sub>2</sub>Ru: C 67.48, H 6.11, N 6.29; found: C 68.02, H 6.08, N 6.30. <sup>‡</sup>The formation of **2** could also be achieved (in ca. 5% yield) at room temperature, as shown by spectroscopic monitoring of a [D<sub>6</sub>]benzene solution of **1** (26 mg, 0.030 mmol) and DPEphos (19 mg, 0.035 mmol) over ca. 3 weeks at room temperature (Figure S4).

**[Ru(IEt<sub>2</sub>Me<sub>2</sub>)(IEtMe<sub>2</sub>(C<sub>6</sub>H<sub>4</sub>)PPh<sub>2</sub>)(Ph<sub>2</sub>PC<sub>6</sub>H<sub>4</sub>O)H] (4)**. An Et<sub>2</sub>O (0.3 mL) solution of **3** (31 mg, 0.033 mmol) and DPEphos (21.5 mg, 0.04 mmol) was refluxed overnight in a J. Young's resealable NMR tube to afford pale orange crystals, which were isolated by cannula filtration, washed with Et<sub>2</sub>O (3 x 0.5 mL) and dried in vacuo. Yield: 12 mg (39%). <sup>1</sup>H NMR ([D<sub>6</sub>]benzene, 500 MHz, 298 K): δ = 8.97 (br s, 1H, ArH), 8.43 (br s, 2H, ArH), 7.63 (dt, *J*(H,H) = 7.7 Hz, *J*(H,H) = 1.6 Hz, 1H, ArH), 7.35-7.20 (m, 4H, ArH), 7.08-6.95 (m, 4H, ArH), 6.91 (br s, 3H, ArH), 6.88-6.74 (m, 5H, ArH), 6.70-6.48 (m, 7H, ArH), 5.72 (m, 1H, NCH<sub>2</sub>CH<sub>3</sub>), 5.11 (m, 2H, NCH<sub>2</sub>CH<sub>3</sub>), 3.82 (m, 1H, NCH<sub>2</sub>CH<sub>3</sub>), 3.38 (m, 1H, NCH<sub>2</sub>CH<sub>3</sub>), 2.18 (m, 1H, NCH<sub>2</sub>CH<sub>3</sub>), 1.59 (s, 3H, NCCH<sub>3</sub>), 1.53 (s, 3H, NCCH<sub>3</sub>), 1.46 (s, 3H, NCCH<sub>3</sub>), 1.42 (s, 3H, NCCH<sub>3</sub>), 1.12 (t, <sup>3</sup>*J*(H,H) = 7.1 Hz, 3H, NCH<sub>2</sub>CH<sub>3</sub>), 0.85 (t, <sup>3</sup>*J*(H,H) = 7.0 Hz, 3H, NCH<sub>2</sub>CH<sub>3</sub>), 0.48 (t, <sup>3</sup>*J*(H,H) = 7.0 Hz, 3H, NCH<sub>2</sub>CH<sub>3</sub>), -17.71 (dd, <sup>2</sup>*J*(H,P) = 20.0 Hz, <sup>2</sup>*J*(H,P) = 15 Hz, 1H, RuH) ppm; <sup>31</sup>P{<sup>1</sup>H} NMR ([D<sub>6</sub>]benzene, 202 MHz, 298 K): δ = 59.3 (d, <sup>2</sup>*J*(P,P) = 29 Hz), 54.6 (d, <sup>2</sup>*J*(P,P) = 29 Hz) ppm; <sup>13</sup>C{<sup>1</sup>H} NMR ([D<sub>6</sub>]benzene, 100 MHz, 298 K): δ = 194.5 (dd, <sup>2</sup>*J*(C,P) = 80 Hz, <sup>2</sup>*J*(C,P) = 21 Hz, NCN), 191.5 (dd, <sup>2</sup>*J*(C,P) = 88 Hz, <sup>2</sup>*J*(C,P) = 15 Hz, NCN), 179.2 (d, <sup>2</sup>*J*(C,P) = 23 Hz, OAr), 149.0 (dd, *J*(C,P) = 29 Hz, *J*(C,P) = 4 Hz, Ar), 143.4 (d, *J*(C,P) = 9 Hz, Ar), 139.8 (d, *J*(C,P) = 41 Hz, Ar), 135.3 (s, Ar), 134.3 (t, *J*(C,P) = 11 Hz, Ar), 133.8 (d, *J*(C,P) = 31 Hz, Ar), 132.3 (s, Ar), 130.8 (s, Ar), 130.2 (s, Ar), 124.7 (d, *J*(C,P) = 3 Hz, NCCH<sub>3</sub>), 124.0 (t, *J*(C,P) = 2 Hz, NCCH<sub>3</sub>), 123.8 (d, *J*(C,P) = 3 Hz, NCCH<sub>3</sub>), 123.7 (d, *J*(C,P) = 2 Hz, NCCH<sub>3</sub>), 43.8 (s, NCH<sub>2</sub>CH<sub>3</sub>), 43.5 (s, NCH<sub>2</sub>CH<sub>3</sub>), 41.4 (s, NCH<sub>2</sub>CH<sub>3</sub>), 16.1 (s, NCH<sub>2</sub>CH<sub>3</sub>), 14.4 (s, NCH<sub>2</sub>CH<sub>3</sub>), 14.0 (s, NCH<sub>2</sub>CH<sub>3</sub>), 11.1 (s, NCCH<sub>3</sub>),

10.0 (s, CH<sub>3</sub>), 9.3 (s, NCCH<sub>3</sub>), 8.9 (s, NCCH<sub>3</sub>) ppm; elemental analysis (%) calcd for C<sub>52</sub>H<sub>55</sub>N<sub>4</sub>OP<sub>2</sub>Ru: C 68.18, H 6.16, N 6.12; found: C 68.57, H 6.16, N 6.02.

**[Ru(DPEphos)<sub>2</sub>H<sub>2</sub>] (5).** [Ru(PPh<sub>3</sub>)<sub>4</sub>H<sub>2</sub>] (300 mg, 0.26 mmol) and DPEphos (336 mg, 0.62 mmol) were dissolved in C<sub>6</sub>H<sub>6</sub> (2 mL) in a J. Youngs resealable ampoule and stirred at room temperature for 8 h. The solution was filtered by cannula and layered with pentane to afford **5** as yellow crystals. Yield: 270 mg (88%). <sup>1</sup>H NMR ([D<sub>6</sub>]benzene, 500 MHz, 298 K): δ = 7.78-7.31 (m, 12 H, ArH), 7.02-6.19 (m, 44 H, ArH), -9.80 (m, 2 H, RuH) ppm; <sup>31</sup>P{<sup>1</sup>H} NMR ([D<sub>6</sub>]benzene, 202 MHz, 298 K): δ = 41.4 (t, <sup>2</sup>J(P,P) = 18 Hz), 35.3 (t, <sup>2</sup>J(P,P) = 18 Hz) ppm; elemental analysis (%) calcd for C<sub>69</sub>H<sub>55</sub>O<sub>2</sub>P<sub>4</sub>Ru: C 73.26, H 4.86; found: C 73.14, H 5.12.

**[Ru(DPEphos)(Ph<sub>2</sub>PC<sub>6</sub>H<sub>4</sub>O)H] (6) and [Ru(DPEphos)(Ph<sub>2</sub>PC<sub>6</sub>H<sub>4</sub>O)Cl] (7).**

[Ru(PPh<sub>3</sub>)<sub>4</sub>H<sub>2</sub>] (300 mg, 0.26 mmol) and DPEphos (310 mg, 0.57 mmol) were dissolved in THF (3 mL) in an ampoule fitted with a J. Young's resealable tap and heated at 80 °C overnight. The solution was filtered by cannula and the filtrate reduced to dryness to give **6** as a yellow solid. This was washed with pentane (3 x 10 mL), dried in vacuo and then recrystallised from toluene/pentane. Yield: 125 mg (51 %). <sup>1</sup>H NMR ([D<sub>6</sub>]benzene, 500 MHz, 298 K): δ = 8.33-7.20 (m, 18H, ArH), 7.09-6.33 (m, 24H, ArH), -13.95 (q, <sup>2</sup>J(H,P) = 21.7 Hz, RuH) ppm; <sup>31</sup>P{<sup>1</sup>H} NMR ([D<sub>6</sub>]benzene, 202 MHz, 298 K): δ = 76.8 (t, <sup>2</sup>J(P,P) = 30.1 Hz, Ph<sub>2</sub>PC<sub>6</sub>H<sub>4</sub>O), 49.9 (br s, DPEphos) ppm; elemental analysis (%) calcd for C<sub>54</sub>H<sub>43</sub>O<sub>2</sub>P<sub>3</sub>Ru·C<sub>7</sub>H<sub>8</sub>: C 72.53, H 5.09; found: C 72.49, H 5.13. Attempts to grow crystals of **6** proved unsuccessful, but upon layering a saturated CD<sub>2</sub>Cl<sub>2</sub> solution of the complex with pentane, a small amount of X-ray quality crystalline material was obtained which comprised of a mixture of **6** and [Ru(DPEphos)(Ph<sub>2</sub>PC<sub>6</sub>H<sub>4</sub>O)Cl] (**7**) (see crystallography section for details).

**[Ru(DPEphos)(Ph<sub>2</sub>PC<sub>6</sub>H<sub>4</sub>O)Cl] (7).** [Ru(DPEphos)(Ph<sub>2</sub>PC<sub>6</sub>H<sub>4</sub>O)H] (20 mg, 0.022 mmol) was refluxed for 10 h in CD<sub>2</sub>Cl<sub>2</sub> (0.5 mL) or in [D<sub>6</sub>]benzene containing 5 equiv benzyl chloride (14 mg, 0.11 mmol) in J. Young's resealable NMR tubes. In both cases, spectroscopic monitoring showed formation of **7**. The compound was accessible on a preparative scale by overnight reflux of [Ru(DPEphos)(Ph<sub>2</sub>PC<sub>6</sub>H<sub>4</sub>O)H] (60 mg, 0.06 mmol) in CH<sub>2</sub>Cl<sub>2</sub> in a J. Young's resealable NMR tube. An orange microcrystalline solid was obtained upon layering the solution with Et<sub>2</sub>O. The solid was washed with Et<sub>2</sub>O (3 x 0.5 mL) and dried in vacuo. Yield: 26 mg (42%). <sup>31</sup>P{<sup>1</sup>H} NMR (CH<sub>2</sub>Cl<sub>2</sub>, 202 MHz, 298 K): δ = 64.5 (t, <sup>2</sup>J(P,P)=30 Hz, Ph<sub>2</sub>P(C<sub>6</sub>H<sub>4</sub>)O), 35.0 (br, DPEphos), 30.7 (br, DPEphos) ppm; elemental analysis (%) calcd for C<sub>54</sub>H<sub>42</sub>O<sub>2</sub>P<sub>3</sub>ClRu·0.3CH<sub>2</sub>Cl<sub>2</sub>: C 66.69, H 4.39; found: C 66.74, H 4.24.

**X-ray crystallography.** Data for **2**, **5** and **7** were collected on an Agilent SuperNova diffractometer, using a Cu-Kα source, while those for **4** were obtained using an Agilent Xcalibur instrument equipped with Mo-Kα radiation. All experiments were conducted at 150 K. Convergences were achieved using SHELX<sup>[3]</sup> via Olex2<sup>[4]</sup> and were relatively straightforward. Only points of note are mentioned hereafter. The hydrogen atoms in **2** were included at calculated positions with the exception of the hydride ligand. This was located and refined subject to being a distance of 1.6 Å from Ru1. The U<sub>iso</sub> values for the each of the hydrogens attached to C4 and C14 were refined freely, as two of these fall within the range of being involved in typical C-H...O interactions. The residual electron density in this structure was explored at length. It is indicative of disorder in the Ph-O-Ph moiety, after cleavage of the C-O bond during the reaction. The electron density maximum is at a position that suggests disorder with O1. A model was constructed for this disorder but, as it is in the region of 10%, it was abandoned in the interests of negating the mandatory inclusion of multiple restraints for the minor component in order to secure a chemically meaningful convergence.

Treatment of the hydride ligands in **4** and **5** (Figure S14) was similar to that in **2**. The asymmetric unit in **5** was also host to half of a guest molecule of benzene. In addition to one ruthenium complex molecule, the asymmetric unit in **7** was seen to contain one full molecule of dichloromethane and a separate solvent region that equated to 0.7 molecules of CH<sub>2</sub>Cl<sub>2</sub> disordered over two sites in a 40:30 ratio. C-Cl distances were restrained to being similar in both of the latter disordered components. The main feature in **7** was also a disorder composite, such that the motif represents 75% of a chloride complex overlaid with 25% of the analogous hydride complex. The included 25% hydride ligand (H1) in the minor component is tenuous in terms of refining it from the electron density and it is really included for completeness. The Ru1-H1 distance was restrained to a value of 1.6 Å (as per hydride treatment in the other structures presented here) and the U<sub>iso</sub> for the hydride was allowed to ride on that for the metal center. Interestingly, however, the phenyl ring based on C25 refined to a site-occupancy of 75% (quite separately to the refinement of the 75% occupancy for Cl1). The corresponding disordered minor component (25% site occupancy) of this ring (based on C25A) is more proximate to the Ru1-H1/Cl1 vectors, which corroborates the presence of a less sterically demanding ligand (i.e. H1) within the crystal in one quarter of instances. The ring based on C25A was treated as a rigid hexagon. ADP restraints were also incorporated into the model for the atoms therein and, finally, the P2-C25 and P2-C25A distances were refined subject to being similar.

CCDC 1532000-1532003 contain the supplementary crystallographic data for compounds **2**, **4**, **5** and **7** respectively. These data can be obtained free of charge at <http://www.ccdc.cam.ac.uk/conts/retrieving.html>, or from the Cambridge Crystallographic Data Centre, CCDC, 12 Union Road, Cambridge CB2 1EZ, UK (Fax: 44-1223-336-033; or E-Mail: [deposit@ccdc.cam.ac.uk](mailto:deposit@ccdc.cam.ac.uk)).

**Table S1.** Crystallographic details for **2**, **4** and **7**.

| Identification code                                                  | <b>2</b>                                                          | <b>4</b>                                                          | <b>7</b>                                                                                |
|----------------------------------------------------------------------|-------------------------------------------------------------------|-------------------------------------------------------------------|-----------------------------------------------------------------------------------------|
| Empirical formula                                                    | C <sub>50</sub> H <sub>54</sub> N <sub>4</sub> OP <sub>2</sub> Ru | C <sub>52</sub> H <sub>56</sub> N <sub>4</sub> OP <sub>2</sub> Ru | C <sub>55.7</sub> H <sub>44.9</sub> Cl <sub>4.15</sub> O <sub>2</sub> P <sub>3</sub> Ru |
| Formula weight                                                       | 889.98                                                            | 916.01                                                            | 1087.31                                                                                 |
| Temperature/K                                                        | 150.00(10)                                                        | 149.99(10)                                                        | 150.01(10)                                                                              |
| Crystal system                                                       | monoclinic                                                        | triclinic                                                         | monoclinic                                                                              |
| Space group                                                          | <i>P</i> 2 <sub>1</sub> / <i>n</i>                                | <i>P</i> -1                                                       | <i>P</i> 2 <sub>1</sub> / <i>c</i>                                                      |
| <i>a</i> /Å                                                          | 19.76710(12)                                                      | 11.0706(6)                                                        | 12.1394(2)                                                                              |
| <i>b</i> /Å                                                          | 10.96787(7)                                                       | 12.4859(6)                                                        | 36.4738(6)                                                                              |
| <i>c</i> /Å                                                          | 20.23805(12)                                                      | 17.8815(9)                                                        | 12.1334(2)                                                                              |
| $\alpha$ /°                                                          | 90                                                                | 73.508(4)                                                         | 90                                                                                      |
| $\beta$ /°                                                           | 95.4189(6)                                                        | 85.536(4)                                                         | 111.404(2)                                                                              |
| $\gamma$ /°                                                          | 90                                                                | 68.278(5)                                                         | 90                                                                                      |
| <i>U</i> /Å <sup>3</sup>                                             | 4368.06(5)                                                        | 2200.7(2)                                                         | 5001.77(17)                                                                             |
| <i>Z</i>                                                             | 4                                                                 | 2                                                                 | 4                                                                                       |
| $\rho_{\text{calc}}$ /g cm <sup>-3</sup>                             | 1.353                                                             | 1.382                                                             | 1.444                                                                                   |
| $\mu$ /mm <sup>-1</sup>                                              | 3.918                                                             | 0.473                                                             | 5.812                                                                                   |
| <i>F</i> (000)                                                       | 1856.0                                                            | 956.0                                                             | 2219.0                                                                                  |
| Crystal size/mm <sup>3</sup>                                         | 0.217 × 0.148 × 0.107                                             | 0.18 × 0.107 × 0.063                                              | 0.24 × 0.084 × 0.031                                                                    |
| Radiation                                                            | CuK $\alpha$ ( $\lambda$ = 1.54184)                               | MoK $\alpha$ ( $\lambda$ = 0.71073)                               | CuK $\alpha$ ( $\lambda$ = 1.54184)                                                     |
| 2 $\theta$ range for data collection/°                               | 8.988 to 143.898                                                  | 6.684 to 54.966                                                   | 7.822 to 146.782                                                                        |
| Index ranges                                                         | -24 ≤ <i>h</i> ≤ 24, -13 ≤ <i>k</i> ≤ 11,<br>-24 ≤ <i>l</i> ≤ 24  | -14 ≤ <i>h</i> ≤ 13, -16 ≤ <i>k</i> ≤ 15,<br>-23 ≤ <i>l</i> ≤ 23  | -15 ≤ <i>h</i> ≤ 13, -44 ≤ <i>k</i> ≤ 44,<br>-14 ≤ <i>l</i> ≤ 13                        |
| Reflections collected                                                | 61367                                                             | 20381                                                             | 59637                                                                                   |
| Independent reflections                                              | 8588, 0.0362                                                      | 10088 0.0550                                                      | 9999, 0.0499                                                                            |
| Data/restraints/parameters                                           | 8588/1/541                                                        | 10088/1/552                                                       | 9999/44/676                                                                             |
| Goodness-of-fit on <i>F</i> <sup>2</sup>                             | 1.029                                                             | 1.001                                                             | 1.152                                                                                   |
| Final <i>R</i> 1, <i>wR</i> 2 [ <i>I</i> >= 2 $\sigma$ ( <i>I</i> )] | 0.0296, 0.0725                                                    | 0.0518, 0.0852                                                    | 0.0421, 0.0995                                                                          |
| Final <i>R</i> 1, <i>wR</i> 2 [all data]                             | 0.0313, 0.0738                                                    | 0.0894, 0.0974                                                    | 0.0447, 0.1009                                                                          |
| Largest diff. peak/hole / e Å <sup>-3</sup>                          | 1.41/-0.51                                                        | 0.51/-0.59                                                        | 0.78/-0.64                                                                              |



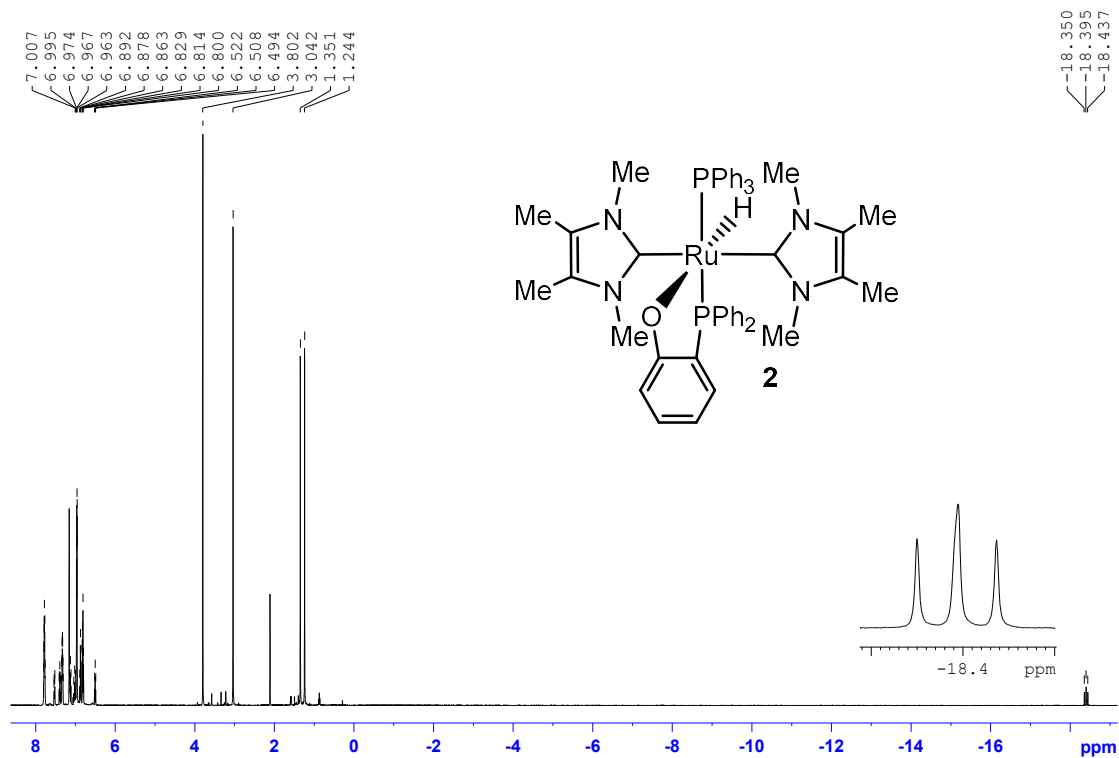

**Figure S1.** <sup>1</sup>H NMR spectrum ([D<sub>6</sub>]benzene, 500 MHz, 298 K) of **2**.

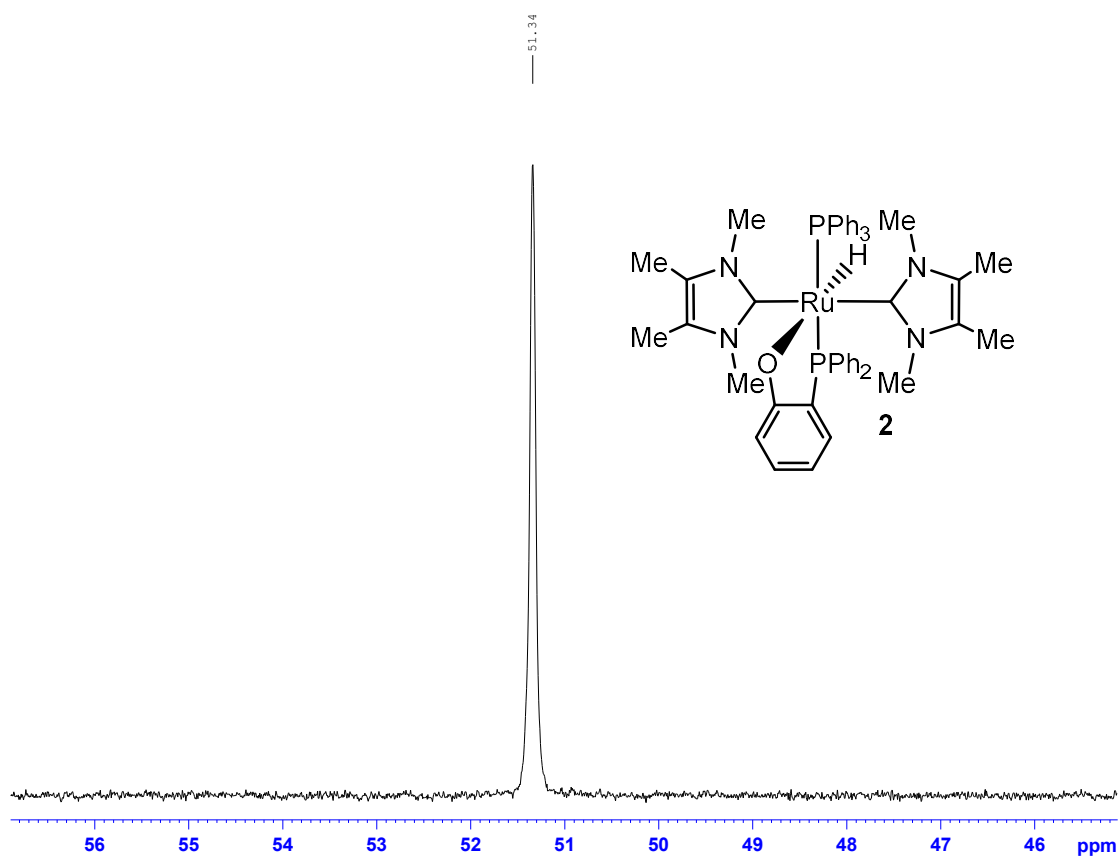

**Figure S2.** <sup>31</sup>P{<sup>1</sup>H} NMR spectrum ([D<sub>6</sub>]benzene, 202 MHz, 298 K) of **2**.

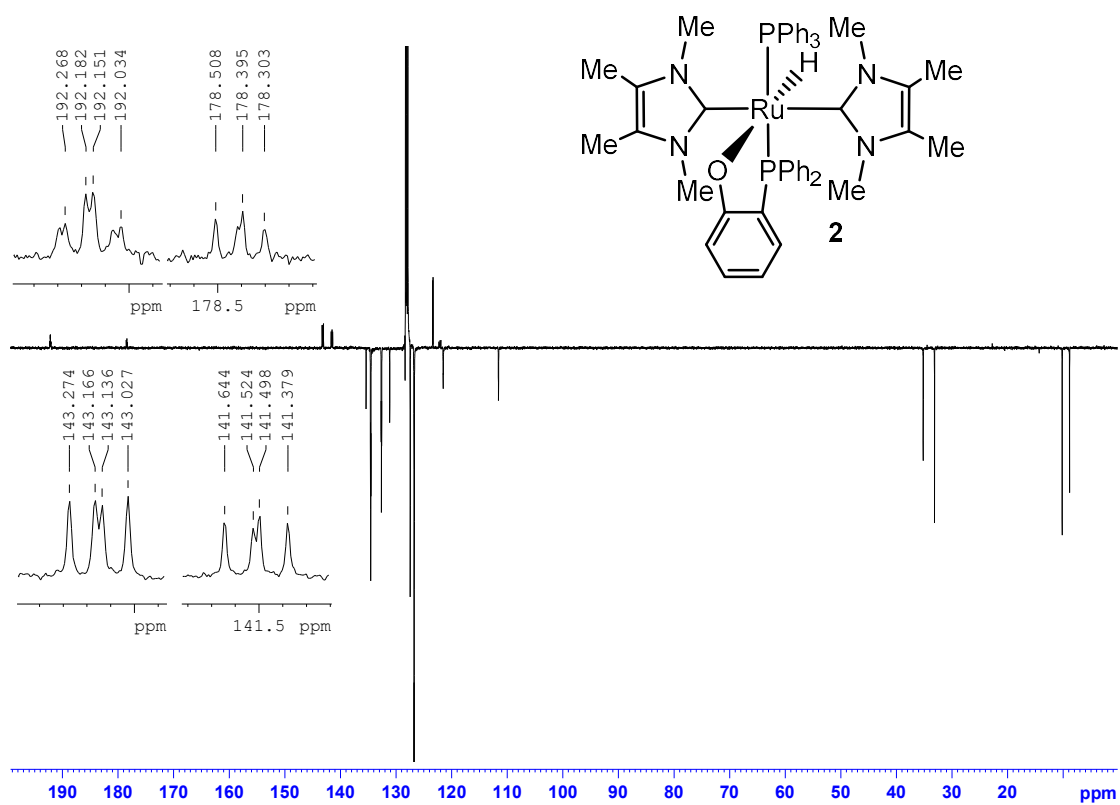

**Figure S3.** <sup>13</sup>C{<sup>1</sup>H} PENDANT NMR spectrum ([D<sub>6</sub>]benzene, 126 MHz, 298 K) of **2**.

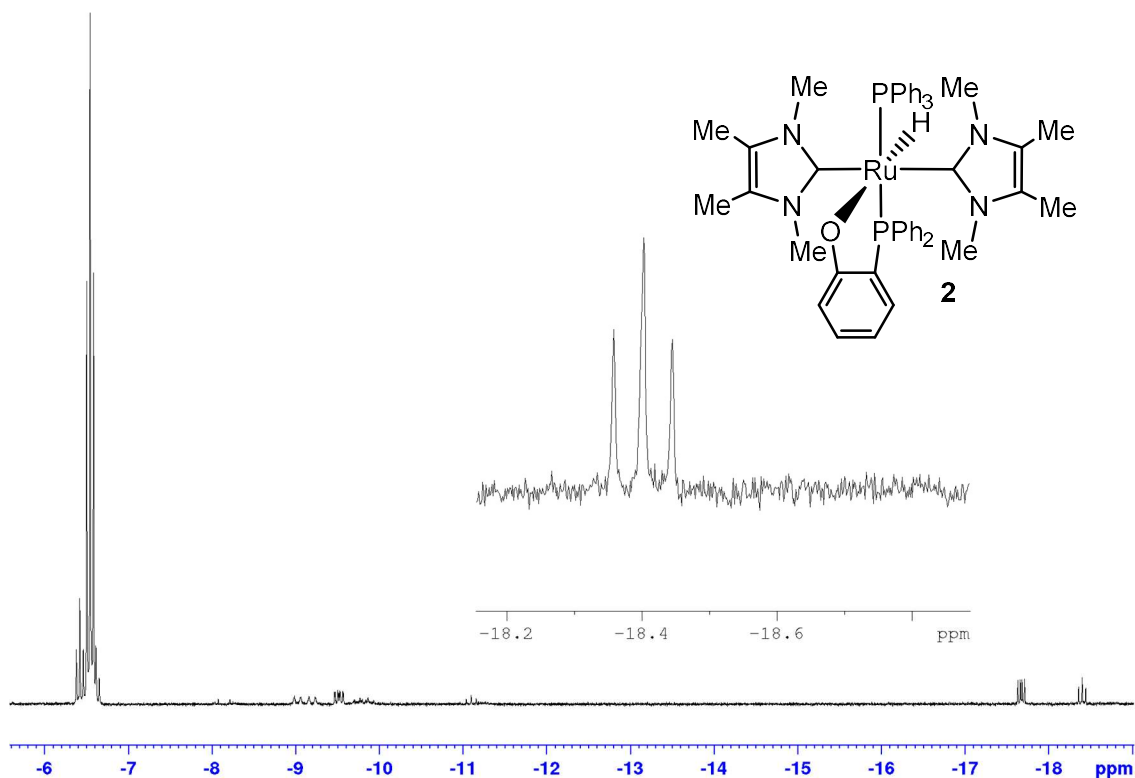

**Figure S4.** Low frequency region of a <sup>1</sup>H NMR spectrum ([D<sub>6</sub>]benzene, 500 MHz, 298 K) of the reaction of **1** with DPEphos recorded after 20 days at room temperature, illustrating the formation of **2** (Ru-H signal of **2** expanded in the inset). Note that the signal for **1** at ca.  $\delta = -6.5$  ppm is made complex by H/D exchange with solvent.

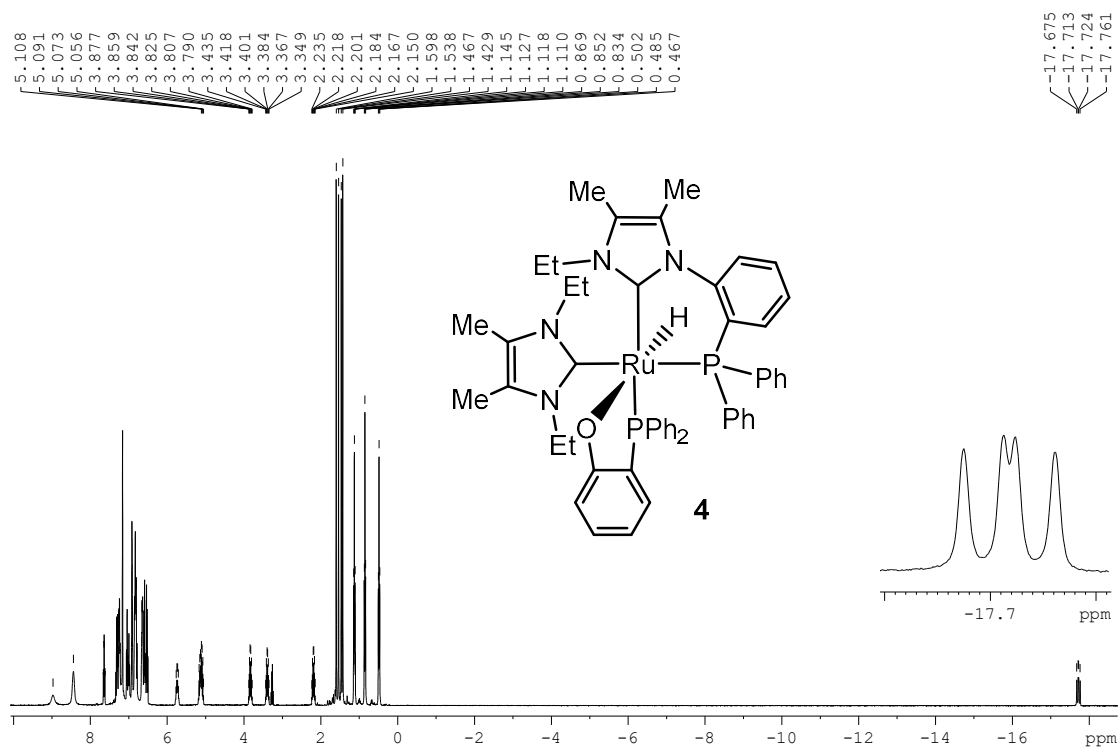

**Figure S5.**  $^1\text{H}$  NMR spectrum ( $[\text{D}_6]$ benzene, 500 MHz, 298 K) of **4**.

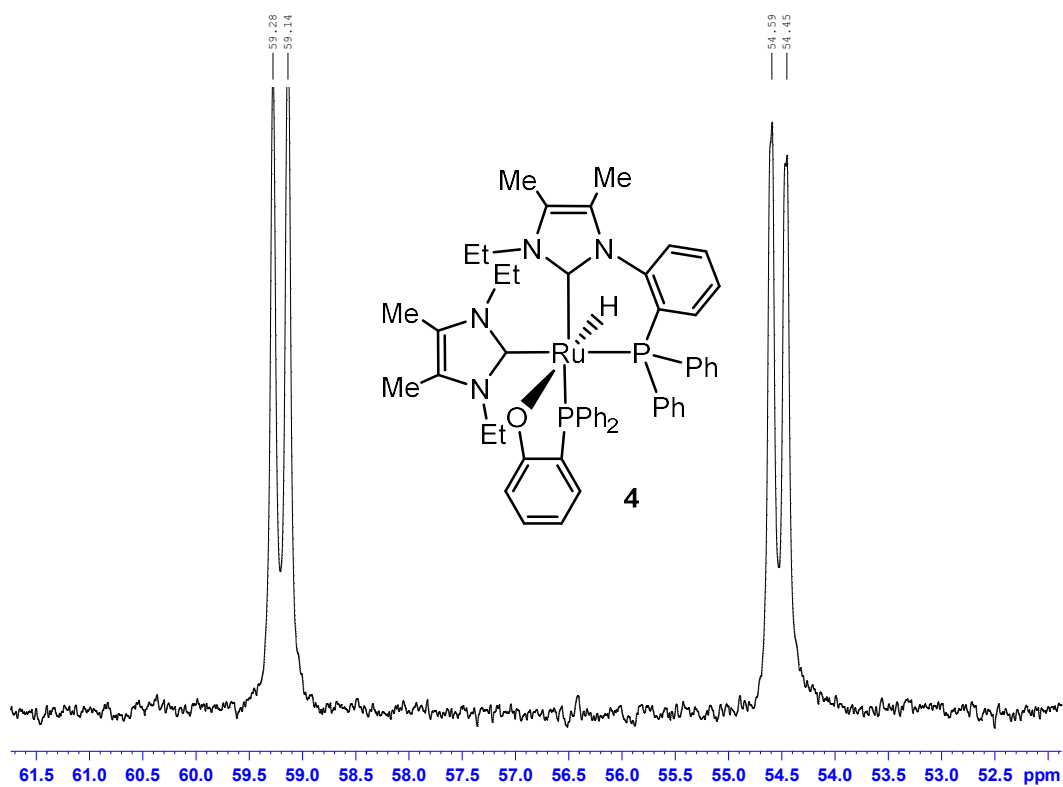

**Figure S6.**  $^{31}\text{P}\{^1\text{H}\}$  NMR spectrum ( $[\text{D}_6]$ benzene, 202 MHz, 298 K) of **4**.

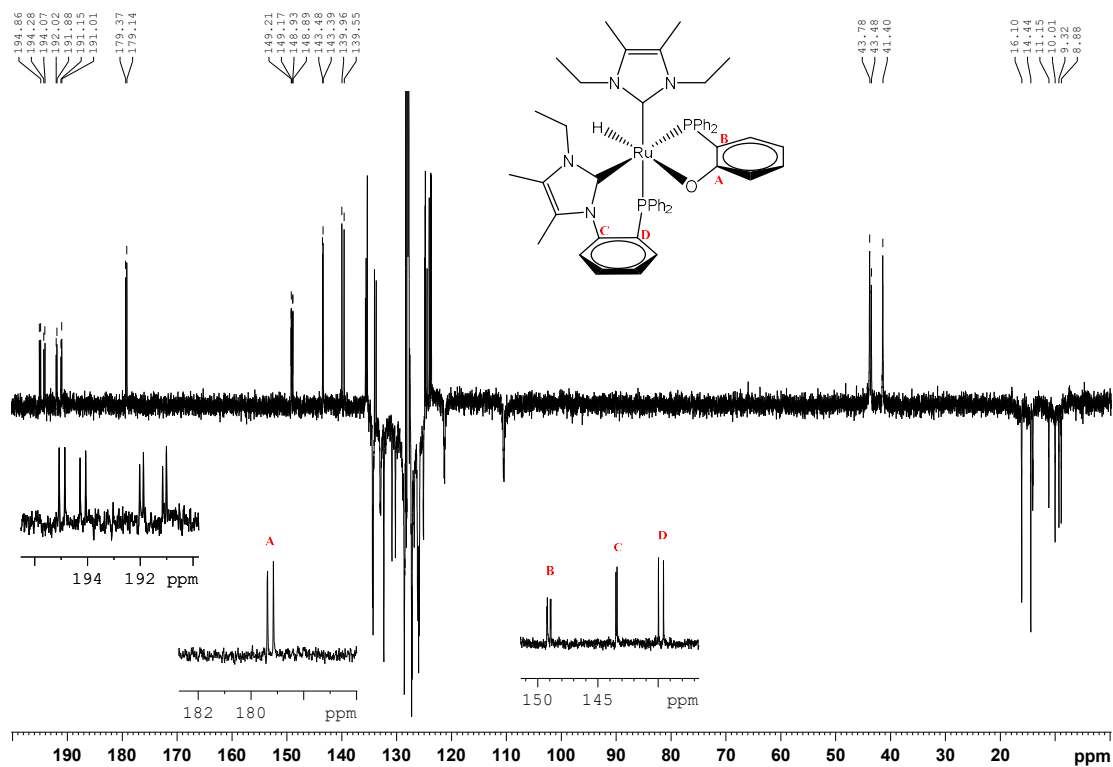

**Figure S7.**  $^{13}\text{C}\{^1\text{H}\}$  PENDANT NMR spectrum ( $[\text{D}_6]$ benzene, 126 MHz, 298 K) of **4**.

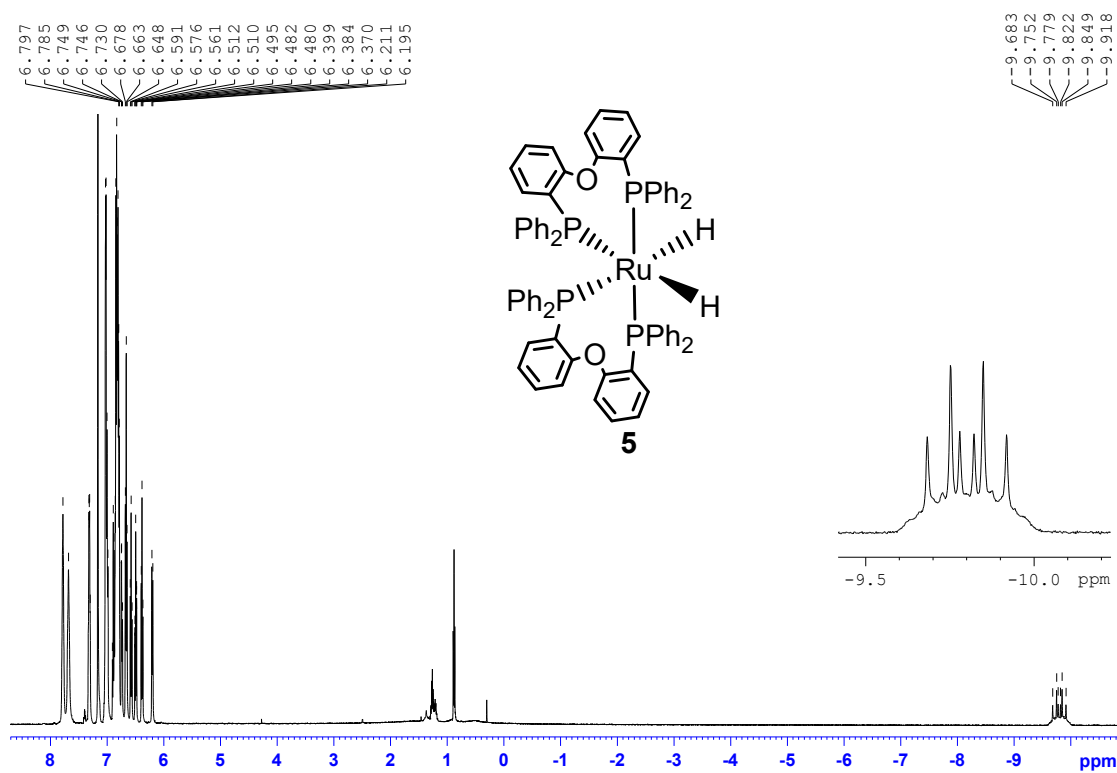

**Figure S8.**  $^1\text{H}$  NMR spectrum ( $[\text{D}_6]$ benzene, 500 MHz, 298 K) of **5**.

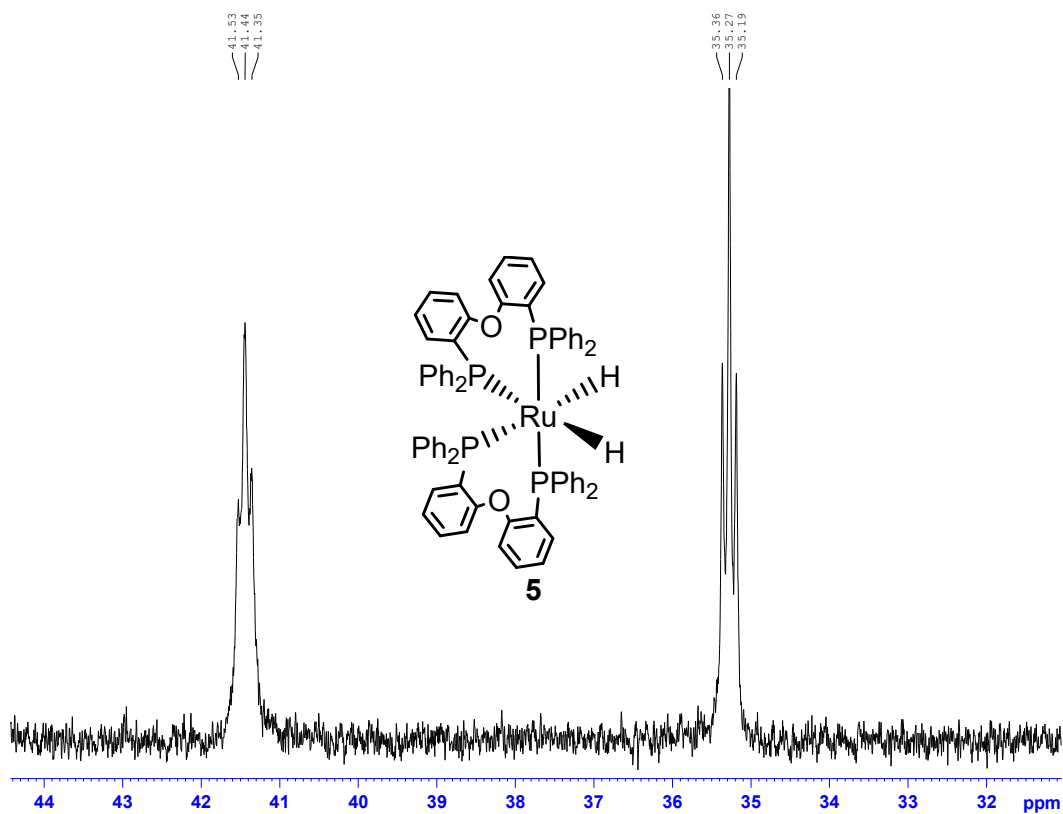

**Figure S9.**  $^{31}\text{P}\{^1\text{H}\}$  NMR spectrum ( $[\text{D}_6]$ benzene, 202 MHz, 298 K) of **5**.

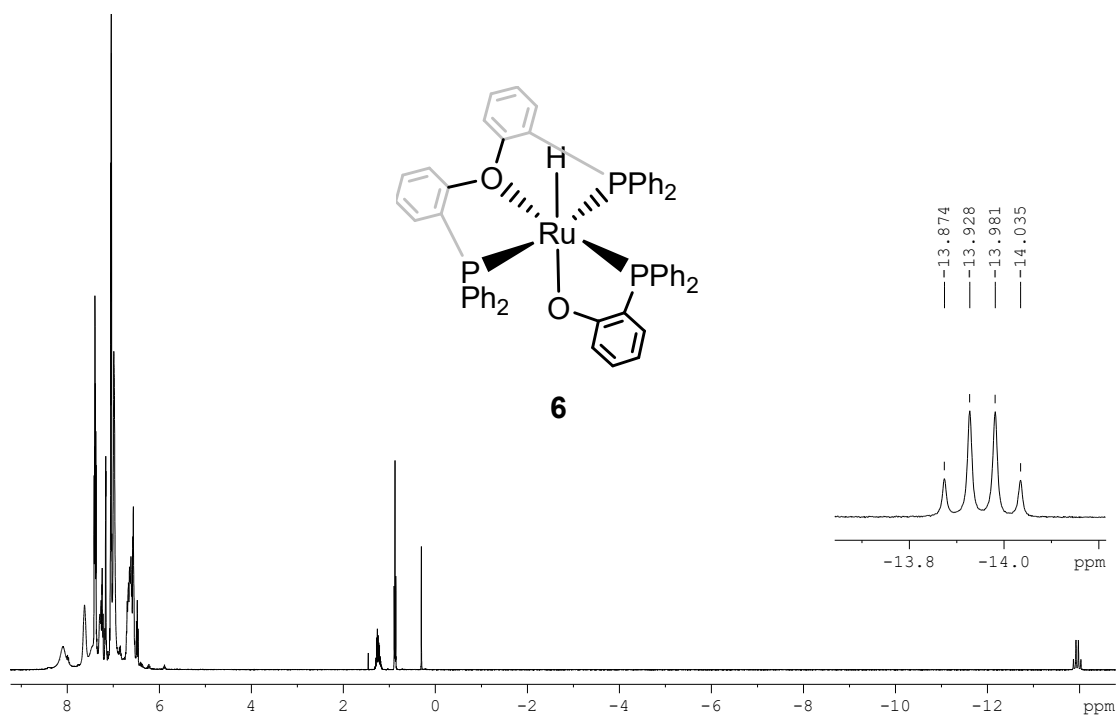

**Figure S10.**  $^1\text{H}$  NMR spectrum ( $[\text{D}_6]$ benzene, 500 MHz, 298 K) of **6**.

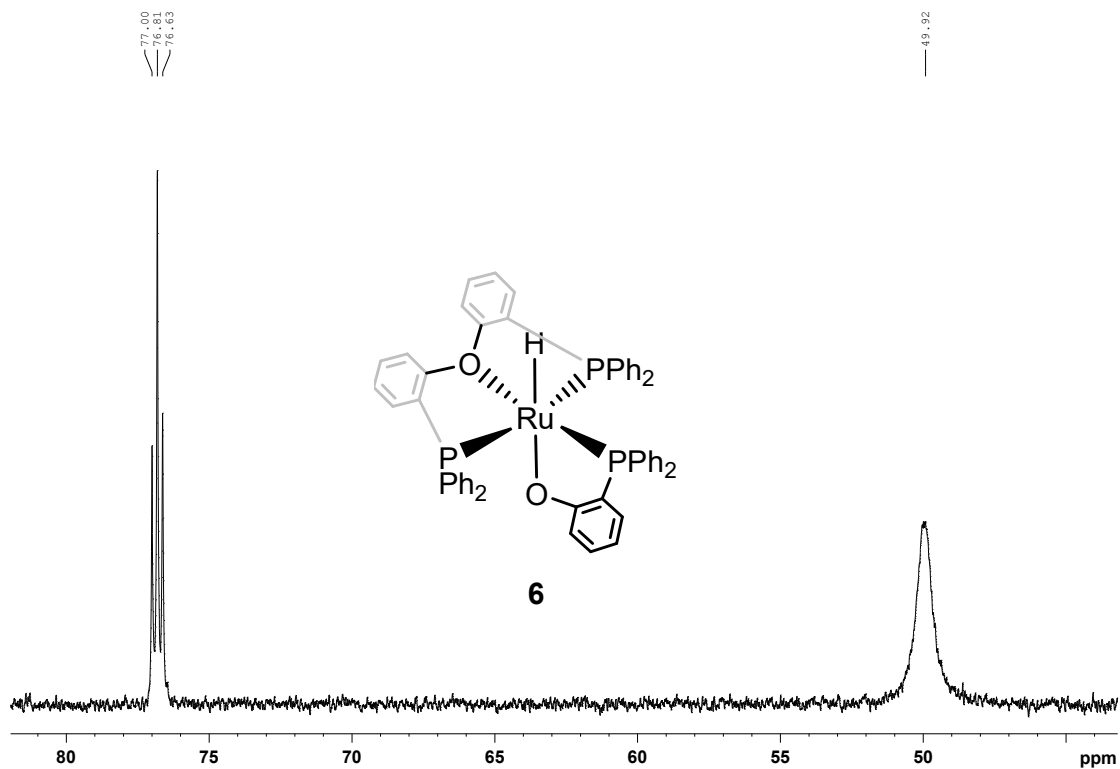

**Figure S11.** <sup>31</sup>P{<sup>1</sup>H} NMR spectrum ([D<sub>6</sub>]benzene, 202 MHz, 298 K) of **6**.

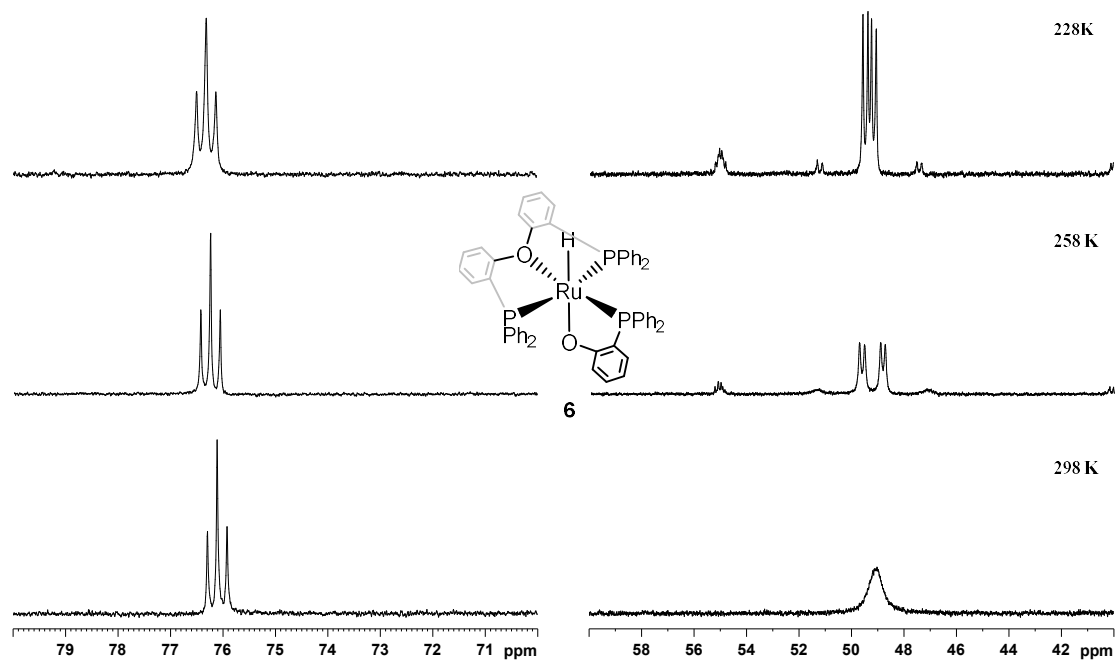

**Figure S12.** Variable temperature <sup>31</sup>P{<sup>1</sup>H} NMR spectra ([D<sub>8</sub>]toluene, 400 MHz) of **6**.

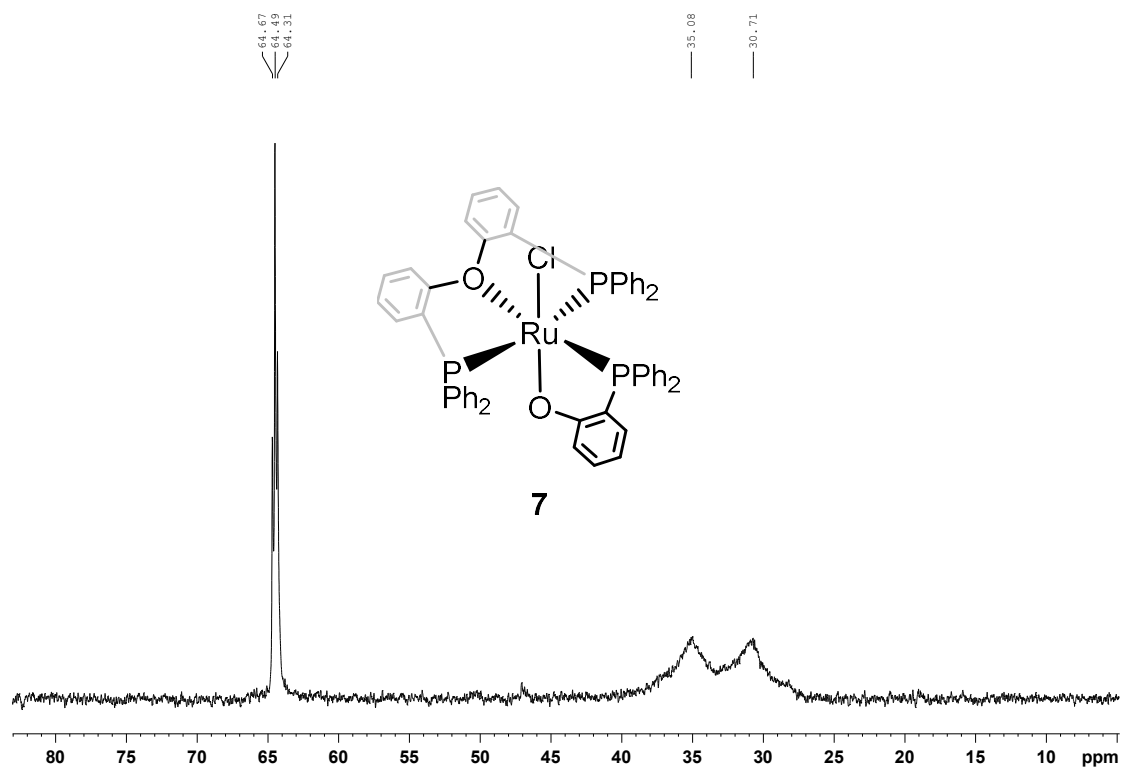

**Figure S13.**  $^{31}\text{P}\{^1\text{H}\}$  NMR spectrum ( $\text{CH}_2\text{Cl}_2$ , 202 MHz, 298 K) of **7**.



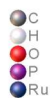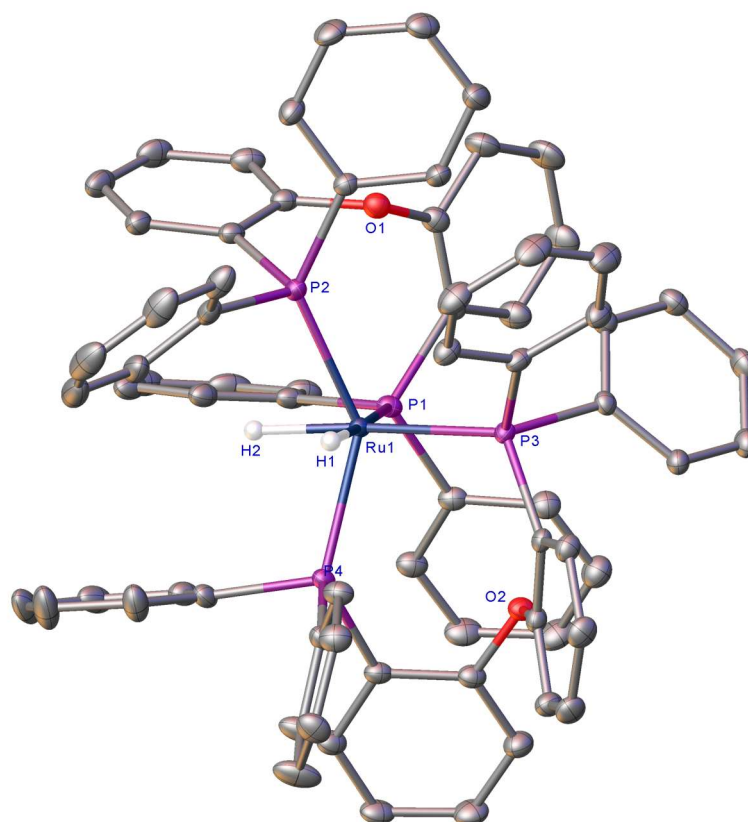

**Figure S14.** Molecular structure of *cis*-Ru(DPEphos)<sub>2</sub>H<sub>2</sub> (**5**). Ellipsoids are shown at the 30% level with all hydrogen atoms (except Ru-H) removed for clarity. Selected bond lengths (Å) and angles (°): Ru(1)-P(1) 2.4108(5), Ru(1)-P(2) 2.3179(5), Ru(1)-P(3) 2.3827(5), Ru(1)-P(4) 2.3156(5), P(1)-Ru(1)-P(3) 104.96(17), P(2)-Ru(1)-P(4) 138.806(18).

**Computational Details.** DFT calculations were run with Gaussian 09 (Revision D.01).<sup>[5]</sup> Ru and P centres were described with the Stuttgart RECPs and associated basis sets<sup>[6]</sup> and 6-31G\*\* basis sets were used for all other atoms.<sup>[7]</sup> A set of d-orbital polarisation functions was also added to P ( $\zeta^d = 0.387$ ).<sup>[8]</sup> Optimizations employed the BP86 functional<sup>[9]</sup> and all stationary points were fully characterised via analytical frequency calculations as either minima (all positive eigenvalues) or transition states (one negative eigenvalue). Transition states were also characterised via IRC calculations and subsequent geometry optimizations confirmed they linked to the minima as reported in the text or in below in the Supporting Information. All stationary points were subjected to rigorous conformational searching (details below) and the lowest energy conformer is reported in each case. SCF energies were corrected for the effects of benzene solvent via the polarizable continuum model (PCM<sup>[10]</sup>) and for dispersion using Grimme's D3 parameter set with Becke-Johnson damping.<sup>[11]</sup> Natural Bonding Orbital analyses employed the NBO 6.0 programs<sup>[12]</sup> and all geometries are supplied as a separate xyz file readable by Chemcraft<sup>[13]</sup> and Mercury.<sup>[14]</sup>

The following protocol was adopted to ensure that the lowest energy conformations were located for each stationary point.<sup>[15]</sup> For each initial structure (derived from experiment or derived from an initial optimisation or TS search) a molecular dynamics (MD) simulation was performed using the Tinker program<sup>[16]</sup> and the MM3 force field. These runs allowed movement of the substituents on the phosphine and IMe<sub>4</sub> ligands, with all other bonds being fixed. Additional force field parameters were added as required to describe the latter. MD simulations were run for 1 ns with a 1 fs time step in an NVT ensemble, with coordinates being collected every picosecond to generate 1000 structures. The trajectories were propagated using the modified Beeman integration algorithm,<sup>[17]</sup> and a Berendsen thermostat<sup>[18]</sup> was used to keep the temperature around 1000 K. This temperature was needed to span the conformational space in the most efficient way. The 1000 generated structures

were then optimised with the MM3 force field with the same geometry constraints as above. Energetically unique structures (typically between 5 and 100 conformations for each stationary point) were then selected for optimization at the DFT level using the approach described above. The lowest energy structure was then fully characterised with a frequency calculation. For transition states, key distances (Ru-H<sup>1</sup>, H<sup>1</sup>-C<sup>1</sup>, C<sup>1</sup>-O and O···Ru) were fixed for the MD and MM3 minimisations, as well as for the initial DFT optimisation. A full TS optimisation was then performed on the lowest energy structure. In some cases where >100 conformations were located (typically in the [Ru(DPEphos)<sub>2</sub>H<sub>2</sub>] systems) an initial optimization at the BP86 level was performed with the lan12dz basis sets and ECPs on Ru and P<sup>[19]</sup> and 6-31g basis sets<sup>[7]</sup> on other atoms (while maintaining the ultrafine grid). The lowest energy structures were then optimised and characterised with the full basis sets above.

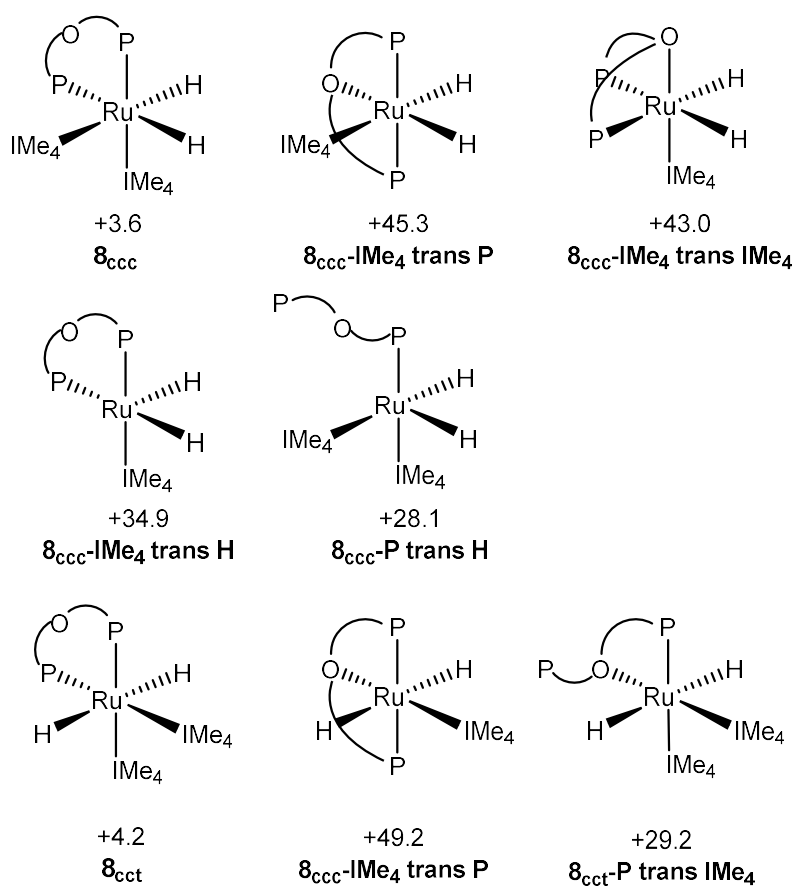

**Figure S15.** Computed ligand dissociation free energies (kcal/mol, BP86(benzene, D3BJ)) in  $[\text{Ru}(\text{IMe}_4)_2(\text{DPEphos})\text{H}_2]$ .

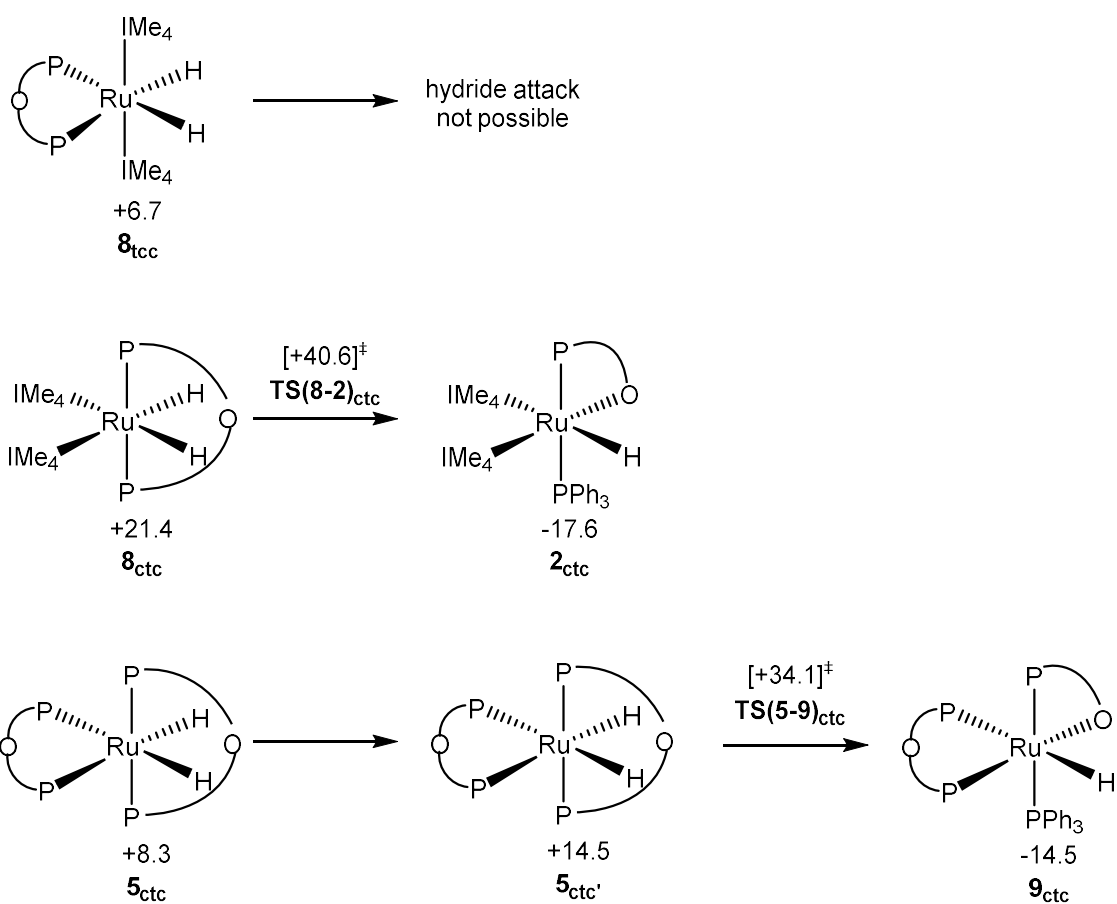

**Figure S16.** Free energy profiles (kcal/mol, BP86(benzene, D3BJ)) for C-O activation in alternative isomers of  $[\text{Ru}(\text{IME}_4)_2(\text{DPEphos})\text{H}_2]$  and  $[\text{Ru}(\text{DPEphos})_2\text{H}_2]$ .

1. Formation and reactivity of  
Ru((Ime4)2(DPEphos)H2

1

SCF = -2266.24091529  
H(0 K)= -2265.332508  
G(298 K)= -2265.427258  
SCF(C6H6) = -2266.24612511  
BP86(D3BJ) = -2266.59927766  
Low Freq. = 16.1734cm-1, 17.8349cm-1

113

C -3.20793 -2.59132 0.74636  
C -3.14690 -1.24562 1.17222  
C -3.64805 -0.92557 2.45002  
C -4.19017 -1.92071 3.28178  
C -4.24255 -3.25503 2.84968  
C -3.75063 -3.58580 1.57499  
P -2.33270 0.02658 0.02876  
C -3.33856 -0.39116 -1.52279  
C -2.68747 -0.45573 -2.76769  
C -3.39908 -0.77261 -3.93811  
C -4.77660 -1.03301 -3.87565  
C -5.43772 -0.98188 -2.63601  
C -4.72414 -0.66858 -1.46858  
Ru 0.00007 0.07742 -0.00011  
C 0.00052 2.18084 -0.00024  
N 0.46542 3.06212 0.97316  
C 0.30135 4.40663 0.61620  
C -0.29905 4.40665 -0.61723  
N -0.46390 3.06215 -0.97386  
C 1.07096 2.66260 2.23428  
C -1.06994 2.66263 -2.23474  
P 2.33281 0.02545 -0.02863  
C 3.14643 -1.24734 -1.17183  
C 3.64781 -0.92765 -2.44964  
C 4.18937 -1.92315 -3.28132  
C 4.24092 -3.25749 -2.84917  
C 3.74876 -3.58790 -1.57448  
C 3.20664 -2.59305 -0.74590  
C 3.18240 1.60604 -0.61346  
C 2.68327 2.20554 -1.79278  
C 3.25292 3.38504 -2.29623  
C 4.31495 4.00430 -1.61567  
C 4.80133 3.43248 -0.43065  
C 4.24373 2.23998 0.06442  
C 3.33823 -0.39258 1.52311  
C 2.68713 -0.45624 2.76805  
C 3.39854 -0.77321 3.93857  
C 4.77587 -1.03462 3.87617  
C 5.43700 -0.98440 2.63651  
C 4.72362 -0.67101 1.46898  
C -0.00048 -2.03932 -0.00015  
N -0.07424 -2.92168 1.07811  
C -0.04913 -4.26556 0.68453  
C 0.04645 -4.26559 -0.68485  
N 0.07258 -2.92173 -1.07844  
C -0.22936 -2.54617 2.47878  
C 0.22826 -2.54635 -2.47908  
C -3.18133 1.60766 0.61361  
C -2.68181 2.20694 1.79287  
C -3.25082 3.38674 2.29632  
C -4.31260 4.00652 1.61583  
C -4.79937 3.43490 0.43086  
C -4.24239 2.24210 -0.06421  
C -0.13487 -5.39803 1.65774  
C 0.13114 -5.39812 -1.65808  
C -0.73996 5.54329 -1.48326  
C 0.74297 5.54321 1.48195  
H -0.11824 0.11459 1.68554  
H -0.73528 3.33377 -3.04276  
H -2.17238 2.69160 -2.17630  
H -0.74295 1.63063 -2.43084  
H 0.73604 3.33377 3.04218  
H 2.17343 2.69149 2.17626  
H 0.74377 1.63065 2.43031

H -1.15111 -2.98934 2.89155  
H -0.29847 -1.44704 2.50275  
H 0.63988 -2.88524 3.06887  
H -0.64100 -2.88498 -3.06938  
H 1.14989 -2.99003 -2.89158  
H 0.29796 -1.44726 -2.50309  
H 5.62400 3.91025 0.11325  
H 4.75545 4.92906 -2.00400  
H 2.86047 3.82636 -3.21925  
H 1.82924 1.73849 -2.29540  
H -5.24666 -0.64799 -0.50628  
H -6.51131 -1.19275 -2.57660  
H -5.33352 -1.28248 -4.78552  
H -2.87367 -0.82066 -4.89876  
H -1.60645 -0.27149 -2.78896  
H 4.64291 1.80463 0.98533  
H 0.11854 0.11434 -1.68578  
H 3.63089 0.10903 -2.79901  
H 4.58023 -1.64869 -4.26750  
H 4.66967 -4.03197 -3.49439  
H 3.79289 -4.62314 -1.21797  
H 2.83106 -2.86675 0.24538  
H 1.60624 -0.27121 2.78932  
H 2.87311 -0.82055 4.89924  
H 5.33263 -1.28415 4.78612  
H 6.51044 -1.19605 2.57714  
H 5.24613 -0.65111 0.50666  
H -1.82800 1.73945 2.29547  
H -2.85808 3.82789 3.21930  
H -4.75260 4.93150 2.00417  
H -5.62183 3.91306 -0.11299  
H -4.64186 1.80692 -0.98508  
H -3.63047 0.11112 2.79935  
H -4.58081 -1.64596 4.26797  
H -4.67176 -4.02921 3.49496  
H -3.79543 -4.62102 1.21852  
H -2.83252 -2.86530 -0.24492  
H 1.82521 5.49944 1.70193  
H 0.54671 6.50222 0.97716  
H 0.21134 5.56768 2.45153  
H -0.54332 6.50229 -0.97859  
H -0.20815 5.56736 -2.45275  
H -1.82218 5.50002 -1.70343  
H -1.08037 -5.37702 2.23026  
H -0.08705 -6.36198 1.12685  
H 0.69084 -5.38168 2.39263  
H 0.08278 -6.36203 -1.12718  
H -0.69476 -5.38120 -2.39275  
H 1.07649 -5.37780 -2.23085

DPEphos

SCF = -1477.02441902  
H(0 K)= -1476.509312  
G(298 K)= -1476.583577  
SCF(C6H6) = -1477.02930551  
BP86(D3BJ) = -1477.20362745  
Low Freq. = 7.4117cm-1, 9.2942cm-1

67

C -2.31994 -1.41136 0.56461  
C -1.00083 -1.91237 0.66153  
C -0.69216 -3.03023 1.45600  
C -1.71508 -3.67509 2.16481  
C -3.03461 -3.20054 2.08573  
C -3.32688 -2.07820 1.29537  
O 0.00006 -1.20335 0.00013  
C 1.00093 -1.91243 -0.66124  
C 0.69222 -3.03034 -1.45563  
C 1.71511 -3.67526 -2.16443  
C 3.03465 -3.20072 -2.08542  
C 3.32696 -2.07833 -1.29515  
C 2.32005 -1.41144 -0.56439  
P 2.62796 0.02294 0.60355  
C 4.50321 0.00532 0.67611  
P -2.62779 0.02294 -0.60345  
C -4.50303 0.00516 -0.67631

C -2.32890 1.49433 0.51487  
 C 2.32877 1.49426 -0.51478  
 H 0.34274 -3.37960 1.51385  
 H -1.47560 -4.54499 2.78528  
 H -3.83566 -3.70102 2.63918  
 H -4.35637 -1.71282 1.22932  
 H 4.35646 -1.71296 -1.22915  
 H 3.83568 -3.70124 -2.63887  
 H 1.47560 -4.54520 -2.78483  
 H -0.34269 -3.37970 -1.51343  
 C 5.34861 0.71370 -0.20404  
 C 6.74360 0.66757 -0.04376  
 C 7.31282 -0.08916 0.99332  
 C 6.48064 -0.79652 1.87690  
 C 5.08681 -0.74131 1.72407  
 H 4.91143 1.30692 -1.01371  
 H 7.38735 1.22523 -0.73293  
 H 8.40052 -0.12211 1.11714  
 H 6.91670 -1.38268 2.69311  
 H 4.44002 -1.27819 2.42824  
 C 2.22068 2.75505 0.11218  
 C 2.01197 3.91588 -0.64735  
 C 1.88852 3.83033 -2.04414  
 C 1.97711 2.57939 -2.67546  
 C 2.19938 1.41777 -1.91711  
 H 2.29641 2.82507 1.20341  
 H 1.93538 4.88689 -0.14650  
 H 1.71741 4.73487 -2.63762  
 H 1.87517 2.50480 -3.76370  
 H 2.27113 0.44607 -2.41615  
 C -2.22078 2.75510 -0.11214  
 C -2.01228 3.91597 0.64737  
 C -1.88908 3.83050 2.04419  
 C -1.97768 2.57959 2.67555  
 C -2.19974 1.41792 1.91722  
 H -2.29633 2.82506 -1.20338  
 H -1.93568 4.88697 0.14649  
 H -1.71813 4.73508 2.63765  
 H -1.87593 2.50506 3.76382  
 H -2.27151 0.44623 2.41630  
 C -5.34863 0.71349 0.20369  
 C -6.74358 0.66724 0.04319  
 C -7.31258 -0.08958 -0.99395  
 C -6.48020 -0.79689 -1.87738  
 C -5.08640 -0.74156 -1.72433  
 H -4.91163 1.30678 1.01341  
 H -7.38750 1.22487 0.73224  
 H -8.40026 -0.12261 -1.11795  
 H -6.91608 -1.38312 -2.69364  
 H -4.43946 -1.27841 -2.42838

PPh3

SCF = -701.502629684  
 H(0 K) = -701.237099  
 G(298 K) = -701.284049  
 SCF(C6H6) = -701.505204420  
 BP86(D3BJ) = -701.583032714  
 Low Freq. = 23.0073cm-1, 25.2587cm-1

34

C -0.78046 4.21297 0.67511  
 C -0.01358 4.06660 -0.49293  
 C 0.19786 2.79152 -1.03889  
 C -0.33782 1.64207 -0.41587  
 C -1.10868 1.80016 0.75512  
 C -1.32915 3.07854 1.29461  
 P 0.00027 -0.00024 -1.25088  
 C -1.25337 -1.11399 -0.41619  
 C 1.59147 -0.52853 -0.41559  
 H -1.54080 0.92001 1.24212  
 H -1.93197 3.18699 2.20297  
 H -0.95512 5.20848 1.09685  
 H 0.41165 4.94747 -0.98590  
 H 0.78148 2.68379 -1.96082  
 C -1.00522 -1.86133 0.75444  
 C -2.00245 -2.69132 1.29346

C -3.25927 -2.78251 0.67390  
 C -3.51560 -2.04449 -0.49377  
 C -2.51669 -1.22402 -1.03931  
 H -0.02700 -1.79616 1.24167  
 H -1.79521 -3.26815 2.20153  
 H -4.03435 -3.43141 1.09530  
 H -4.49109 -2.11598 -0.98680  
 H -2.71495 -0.66419 -1.96097  
 C 2.32265 -1.56257 -1.04203  
 C 3.53271 -2.01665 -0.49591  
 C 4.03930 -1.42990 0.67579  
 C 3.32758 -0.39205 1.29882  
 C 2.11021 0.05582 0.75910  
 H 1.94031 -2.01065 -1.96679  
 H 4.08583 -2.82171 -0.99161  
 H 4.98881 -1.77607 1.09769  
 H 3.72015 0.07254 2.21003  
 H 1.56123 0.86668 1.24871

IME4

SCF = -383.432446140  
 H(0 K) = -383.255338  
 G(298 K) = -383.290232  
 SCF(C6H6) = -383.436076820  
 BP86(D3BJ) = -383.462871813  
 Low Freq. = 121.9546cm-1, 124.0941cm-1

21

C -0.68843 0.64433 -0.00009  
 N -1.06514 -0.71067 -0.00023  
 C 0.00000 -1.59189 -0.00005  
 N 1.06514 -0.71067 0.00006  
 C 0.68843 0.64433 0.00010  
 C -2.44336 -1.18034 0.00015  
 C 2.44336 -1.18034 -0.00002  
 C 1.66794 1.77560 0.00006  
 C -1.66794 1.77559 -0.00004  
 H 2.40319 -2.27846 0.00014  
 H 2.98833 -0.83447 0.89649  
 H 2.98817 -0.83473 -0.89673  
 H -2.98923 -0.83223 -0.89493  
 H -2.98726 -0.83697 0.89828  
 H -2.40320 -2.27846 -0.00270  
 H 1.14013 2.74304 0.00018  
 H 2.32521 1.75870 0.88945  
 H 2.32500 1.75882 -0.88949  
 H -1.14014 2.74304 0.00002  
 H -2.32510 1.75882 -0.88952  
 H -2.32512 1.75869 0.88942

8ccc

SCF = -2340.25299607  
 H(0 K) = -2339.361345  
 G(298 K) = -2339.456861  
 SCF(C6H6) = -2340.25937375  
 BP86(D3BJ) = -2340.60855419  
 Low Freq. = 17.5936cm-1, 20.7694cm-1

112

N 2.51531 1.71019 -2.34116  
 C 2.13364 1.35850 -1.04805  
 N 3.25807 1.71633 -0.31160  
 C 4.28310 2.25175 -1.10583  
 C 3.80664 2.25530 -2.39256  
 Ru 0.31414 0.59477 -0.45566  
 P 1.21123 -1.45314 0.41653  
 C 2.89508 -1.90530 -0.33503  
 C 3.39579 1.51786 1.12244  
 C 1.67722 1.58870 -3.52832  
 C 0.06630 2.05461 1.07271  
 N -0.37347 1.94658 2.39260  
 C -0.43957 3.18198 3.05367  
 C -0.02606 4.12515 2.14555  
 N 0.26914 3.43120 0.96184  
 C -0.81463 0.70401 3.01095

C 0.68762 4.11382 -0.25738  
P -2.00152 0.13128 -0.59992  
C -2.93950 1.72979 -0.96630  
C -2.64669 -0.94605 -2.02666  
C -3.15317 -0.57835 0.75525  
C -2.72746 -1.67108 1.54800  
C -3.50966 -2.18994 2.59248  
C -4.76825 -1.63400 2.86428  
C -5.22650 -0.55730 2.09020  
C -4.42582 -0.04138 1.05713  
O -1.43979 -2.18263 1.40765  
C -1.12999 -3.03815 0.35289  
C 0.18213 -2.92776 -0.15740  
C 0.57736 -3.86476 -1.13084  
C -0.31369 -4.84359 -1.60526  
C -1.62233 -4.90373 -1.10380  
C -2.03599 -4.00260 -0.11066  
C 1.56427 -2.06414 2.19501  
H 0.48173 -0.33424 -1.80976  
C 0.11893 5.60754 2.28488  
C -0.88326 3.31976 4.47563  
H 0.45540 3.44571 -1.09905  
H 1.77038 4.33273 -0.24959  
H 0.12973 5.05766 -0.36521  
H -0.57935 -0.11179 2.31492  
H -1.90269 0.72225 3.19582  
H -0.29148 0.53349 3.96614  
H -3.04680 -4.04192 0.30607  
H -2.32501 -5.65660 -1.47573  
H 0.01754 -5.55454 -2.36936  
H 1.59300 -3.81874 -1.53507  
H -4.79327 0.81049 0.47718  
H -6.20753 -0.11238 2.28829  
H -5.38145 -2.03880 3.67617  
H -3.10762 -3.01901 3.18292  
H -0.22947 1.69429 -1.51519  
C 4.44691 2.71527 -3.66352  
C 5.60597 2.67798 -0.55350  
H 3.97446 0.60386 1.34496  
H 3.89908 2.38571 1.57972  
H 2.38210 1.41657 1.53185  
H 0.85985 0.89737 -3.28423  
H 1.24422 2.56513 -3.81243  
H 2.27502 1.20354 -4.37091  
C -1.76278 -1.40196 -3.02151  
C -2.23046 -2.16326 -4.10650  
C -3.59268 -2.47968 -4.21334  
C -4.48530 -2.03260 -3.22440  
C -4.01653 -1.27452 -2.14100  
H -0.69973 -1.15580 -2.91577  
H -1.52304 -2.51378 -4.86642  
H -3.95860 -3.07409 -5.05790  
H -5.55154 -2.27573 -3.29450  
H -4.72649 -0.93984 -1.37827  
C -3.44262 2.02539 -2.24955  
C -4.03546 3.27091 -2.52137  
C -4.14851 4.23852 -1.51197  
C -3.65601 3.95309 -0.22690  
C -3.05002 2.71600 0.03990  
H -3.36982 1.27980 -3.04662  
H -4.41618 3.47864 -3.52770  
H -4.61848 5.20550 -1.72188  
H -3.74195 4.69685 0.57334  
H -2.65889 2.51545 1.04228  
C 3.98227 -2.38772 0.42542  
C 5.22211 -2.66256 -0.17882  
C 5.39610 -2.47779 -1.55838  
C 4.32076 -2.00447 -2.32897  
C 3.08971 -1.71062 -1.72238  
H 3.86498 -2.55744 1.49931  
H 6.05070 -3.03281 0.43558  
H 6.35946 -2.70108 -2.02991  
H 4.44115 -1.85851 -3.40851  
H 2.25840 -1.31445 -2.31473  
C 1.46797 -3.42232 2.56949  
C 1.75602 -3.83369 3.88095  
C 2.15720 -2.89527 4.84609

C 2.26378 -1.54218 4.48825  
C 1.96376 -1.13516 3.17700  
H 1.16738 -4.16738 1.82562  
H 1.67031 -4.89317 4.14786  
H 2.38374 -3.21635 5.86861  
H 2.57639 -0.79959 5.23147  
H 2.03219 -0.07559 2.91426  
H 5.51312 3.49521 0.18619  
H 6.13457 1.84474 -0.05535  
H 6.25591 3.04263 -1.36441  
H 3.85016 3.49283 -4.17478  
H 5.43971 3.14386 -3.45497  
H 4.58992 1.88882 -4.38436  
H -0.11538 5.91668 3.31579  
H 1.14617 5.94965 2.06119  
H -0.56146 6.16245 1.61235  
H -0.23162 2.76129 5.17317  
H -0.86502 4.37767 4.78174  
H -1.91300 2.94787 4.62899

8ccc' (from IRC)

SCF = -2340.24014594  
H(0 K) = -2339.347843  
G(298 K) = -2339.441986  
SCF(C6H6) = -2340.24652044  
BP86(D3BJ) = -2340.59315247  
Low Freq. = 11.0042cm<sup>-1</sup>, 23.6886cm<sup>-1</sup>

112

N 2.56115 1.13427 -2.53581  
C 2.13979 1.06724 -1.20810  
N 3.21893 1.63790 -0.53606  
C 4.24128 2.04928 -1.40337  
C 3.82209 1.73360 -2.67137  
Ru 0.28580 0.48373 -0.51320  
P 1.09525 -1.59023 0.44556  
C 2.91267 -1.61437 0.96300  
C 3.34184 1.76184 0.91081  
C 1.77682 0.71017 -3.68958  
C 0.30217 2.08785 0.90986  
N 0.26126 2.10508 2.30466  
C 0.25132 3.39717 2.84580  
C 0.29536 4.25884 1.77795  
N 0.32421 3.45765 0.62501  
C 0.23709 0.91490 3.13716  
C 0.42089 4.04531 -0.70671  
P -2.06920 0.27882 -0.47967  
C -3.04582 0.59231 1.11352  
C -2.89478 1.53765 -1.63805  
C -3.06059 -1.22820 -1.10866  
C -2.51967 -2.53363 -1.14581  
C -3.30519 -3.64934 -1.50191  
C -4.63812 -3.46677 -1.89062  
C -5.19029 -2.17626 -1.90281  
C -4.40966 -1.08207 -1.50353  
O -1.23040 -2.69137 -0.68018  
C -0.19651 -3.28081 -1.38619  
C 1.07992 -2.97333 -0.85187  
C 2.19004 -3.64288 -1.39264  
C 2.05334 -4.51858 -2.48679  
C 0.79159 -4.72498 -3.05778  
C -0.34743 -4.11260 -2.50495  
C 0.36954 -2.66093 1.84958  
H 0.17544 -0.51394 -1.81726  
C 0.30766 5.75437 1.73520  
C 0.18718 3.66433 4.31631  
H 0.22062 3.24214 -1.43107  
H 1.42954 4.46048 -0.88423  
H -0.32332 4.85030 -0.82381  
H 0.46184 0.06351 2.48098  
H -0.75749 0.76489 3.59129  
H 0.99509 0.98512 3.93578  
H -1.33249 -4.28245 -2.94448  
H 0.67700 -5.37876 -3.92907  
H 2.93566 -5.02363 -2.89359  
H 3.18309 -3.47058 -0.96867



|   |          |          |          |
|---|----------|----------|----------|
| H | -4.85728 | -0.08362 | -1.49693 |
| H | -6.23043 | -2.02110 | -2.20733 |
| H | -5.24506 | -4.33467 | -2.16954 |
| H | -2.87181 | -4.65079 | -1.43846 |
| H | -0.13672 | 1.54554  | -1.64018 |
| C | 4.48961  | 1.93876  | -3.99424 |
| C | 5.51108  | 2.47726  | -0.92332 |
| H | 4.33717  | 1.41555  | 1.23245  |
| H | 3.19033  | 2.80637  | 1.23725  |
| H | 2.57315  | 1.12919  | 1.36638  |
| H | 0.99760  | 0.02730  | -3.32003 |
| H | 1.29343  | 1.57530  | -4.17911 |
| H | 2.42751  | 0.19965  | -4.41800 |
| C | -2.44664 | 1.56140  | -2.97846 |
| C | -3.02010 | 2.43374  | -3.91393 |
| C | -4.04494 | 3.31554  | -3.52628 |
| C | -4.49949 | 3.29997  | -2.20055 |
| C | -3.93744 | 2.40903  | -1.26590 |
| H | -1.63437 | 0.89131  | -3.27711 |
| H | -2.66239 | 2.42905  | -4.94978 |
| H | -4.48657 | 4.00444  | -4.25454 |
| H | -5.30230 | 3.97611  | -1.88539 |
| H | -4.32243 | 2.39816  | -0.24199 |
| C | -2.90184 | 1.84199  | 1.76194  |
| C | -3.52822 | 2.09467  | 2.99262  |
| C | -4.29636 | 1.09612  | 3.61631  |
| C | -4.44034 | -0.15109 | 2.98917  |
| C | -3.82761 | -0.39798 | 1.74811  |
| H | -2.29635 | 2.62602  | 1.29667  |
| H | -3.41670 | 3.07814  | 3.46313  |
| H | -4.78178 | 1.29145  | 4.57855  |
| H | -5.04349 | -0.93633 | 3.45874  |
| H | -3.96404 | -1.37243 | 1.26983  |
| C | 3.30336  | -1.71704 | 2.31807  |
| C | 4.64907  | -1.58976 | 2.69987  |
| C | 5.64303  | -1.36483 | 1.73357  |
| C | 5.27244  | -1.25225 | 0.38289  |
| C | 3.92394  | -1.36035 | 0.00507  |
| H | 2.54844  | -1.91150 | 3.08610  |
| H | 4.92091  | -1.67944 | 3.75774  |
| H | 6.69455  | -1.28112 | 2.02894  |
| H | 6.03462  | -1.07627 | -0.38469 |
| H | 3.65253  | -1.23459 | -1.04719 |
| C | 0.95395  | -3.88858 | 2.23247  |
| C | 0.37113  | -4.67896 | 3.23489  |
| C | -0.81401 | -4.26045 | 3.86506  |
| C | -1.41389 | -3.05257 | 3.47863  |
| C | -0.82417 | -2.26231 | 2.47686  |
| H | 1.86966  | -4.23174 | 1.73899  |
| H | 0.83996  | -5.62743 | 3.52057  |
| H | -1.26978 | -4.87906 | 4.64604  |
| H | -2.34633 | -2.72100 | 3.94882  |
| H | -1.30783 | -1.33258 | 2.16138  |
| H | 5.32706  | 3.58785  | -0.32419 |
| H | 6.10367  | 1.98789  | -0.29355 |
| H | 6.14074  | 2.96601  | -1.77968 |
| H | 3.86642  | 2.53257  | -4.68773 |
| H | 5.44107  | 2.47704  | -3.85980 |
| H | 4.72068  | 0.98393  | -4.50244 |
| H | 0.30721  | 6.16392  | 2.75767  |
| H | 1.20166  | 6.15105  | 1.21970  |
| H | -0.57567 | 6.16727  | 1.21343  |
| H | 1.06558  | 3.26360  | 4.85571  |
| H | 0.15041  | 4.74853  | 4.50759  |
| H | -0.71010 | 3.21281  | 4.77757  |

TS (8-2) ccc

|              |                                                     |
|--------------|-----------------------------------------------------|
| SCF =        | -2340.20460858                                      |
| H(0 K)=      | -2339.315269                                        |
| G(298 K)=    | -2339.409267                                        |
| SCF(C6H6) =  | -2340.21165727                                      |
| BP86(D3BJ) = | -2340.55856003                                      |
| Low Freq. =  | -539.9240cm <sup>-1</sup> , 14.2400cm <sup>-1</sup> |

112

|   |         |         |          |
|---|---------|---------|----------|
| N | 2.38563 | 1.52509 | -2.37618 |
|---|---------|---------|----------|

|    |          |          |          |
|----|----------|----------|----------|
| C  | 1.94053  | 1.38028  | -1.06782 |
| N  | 2.94176  | 2.02247  | -0.34587 |
| C  | 3.95536  | 2.53558  | -1.16993 |
| C  | 3.60349  | 2.21407  | -2.45748 |
| Ru | 0.13737  | 0.57343  | -0.43853 |
| P  | 1.32067  | -1.48055 | 0.48367  |
| C  | 3.01315  | -1.33303 | 1.30293  |
| C  | 2.96345  | 2.17206  | 1.10396  |
| C  | 1.68436  | 1.03864  | -3.56036 |
| C  | -0.09560 | 2.08179  | 0.96340  |
| N  | -0.12908 | 2.02522  | 2.36177  |
| C  | -0.33044 | 3.27931  | 2.95743  |
| C  | -0.43763 | 4.17983  | 1.92829  |
| N  | -0.28911 | 3.44692  | 0.73947  |
| C  | 0.16416  | 0.83386  | 3.14161  |
| C  | -0.29601 | 4.10670  | -0.56104 |
| P  | -2.14987 | -0.00078 | -0.39956 |
| C  | -3.03826 | -0.77986 | 1.07002  |
| C  | -3.33077 | 1.44418  | -0.75077 |
| C  | -2.69892 | -1.15440 | -1.77859 |
| C  | -1.87276 | -2.24529 | -2.15100 |
| C  | -2.28459 | -3.14455 | -3.15880 |
| C  | -3.51161 | -2.96570 | -3.80923 |
| C  | -4.33925 | -1.88771 | -3.45352 |
| C  | -3.93449 | -0.99903 | -2.44702 |
| O  | -0.70447 | -2.50318 | -1.47022 |
| C  | 0.57154  | -2.01369 | -2.05361 |
| C  | 1.68490  | -2.26113 | -1.15138 |
| C  | 2.88307  | -2.79490 | -1.62565 |
| C  | 3.07607  | -3.07018 | -2.99893 |
| C  | 2.02835  | -2.78055 | -3.89015 |
| C  | 0.79539  | -2.28371 | -3.44658 |
| C  | 0.66477  | -2.93408 | 1.50037  |
| H  | 0.26133  | -0.61891 | -1.78886 |
| C  | -0.68998 | 5.65405  | 1.94727  |
| C  | -0.41105 | 3.47091  | 4.43867  |
| H  | -0.09579 | 3.33564  | -1.31659 |
| H  | 0.48529  | 4.88599  | -0.59998 |
| H  | -1.27835 | 4.56631  | -0.76198 |
| H  | 0.30919  | 0.01566  | 2.42159  |
| H  | -0.66768 | 0.58008  | 3.81926  |
| H  | 1.08532  | 0.96737  | 3.73645  |
| H  | -0.01550 | -2.11117 | -4.16093 |
| H  | 2.15676  | -2.97771 | -4.96211 |
| H  | 4.02623  | -3.47780 | -3.35604 |
| H  | 3.70924  | -2.95498 | -0.92342 |
| H  | -4.59503 | -0.17362 | -2.16579 |
| H  | -5.30552 | -1.74419 | -3.94856 |
| H  | -3.82545 | -3.67245 | -4.58518 |
| H  | -1.62675 | -3.98459 | -3.39847 |
| H  | -0.44050 | 1.57764  | -1.53918 |
| C  | 4.29920  | 2.47906  | -3.75454 |
| C  | 5.15113  | 3.26119  | -0.64017 |
| H  | 3.99685  | 2.07938  | 1.47062  |
| H  | 2.54734  | 3.14712  | 1.41441  |
| H  | 2.36069  | 1.36759  | 1.53927  |
| H  | 0.68582  | 0.71381  | -3.23766 |
| H  | 1.59176  | 1.84966  | -4.30296 |
| H  | 2.21419  | 0.18316  | -4.00917 |
| C  | -3.05080 | 2.27861  | -1.85611 |
| C  | -3.90065 | 3.34168  | -2.19642 |
| C  | -5.04897 | 3.60335  | -1.42944 |
| C  | -5.34384 | 2.77917  | -0.33413 |
| C  | -4.49936 | 1.70310  | -0.00477 |
| H  | -2.15161 | 2.08569  | -2.45034 |
| H  | -3.66419 | 3.96732  | -3.06457 |
| H  | -5.71037 | 4.43696  | -1.68940 |
| H  | -6.24143 | 2.96244  | 0.26701  |
| H  | -4.76410 | 1.06039  | 0.83911  |
| C  | -3.05434 | -0.07453 | 2.29575  |
| C  | -3.67151 | -0.61952 | 3.43259  |
| C  | -4.27036 | -1.89040 | 3.36890  |
| C  | -4.25093 | -2.60253 | 2.15988  |
| C  | -3.64525 | -2.05040 | 1.01801  |
| H  | -2.59280 | 0.91767  | 2.34949  |
| H  | -3.68988 | -0.05004 | 4.36889  |
| H  | -4.75164 | -2.31809 | 4.25501  |

H -4.71291 -3.59388 2.09905  
H -3.64645 -2.61399 0.08063  
C 3.17691 -1.59560 2.68201  
C 4.40850 -1.37572 3.32007  
C 5.50965 -0.89991 2.58990  
C 5.36342 -0.63938 1.21707  
C 4.12695 -0.84284 0.58225  
H 2.33648 -1.99502 3.25951  
H 4.51054 -1.59370 4.38916  
H 6.47476 -0.74278 3.08359  
H 6.21873 -0.28300 0.63139  
H 4.02658 -0.62638 -0.48497  
C 1.24387 -4.21336 1.34971  
C 0.79825 -5.29644 2.12014  
C -0.23615 -5.11955 3.05595  
C -0.82666 -3.85661 3.20437  
C -0.38133 -2.77113 2.42776  
H 2.03787 -4.36196 0.61070  
H 1.25685 -6.28267 1.98695  
H -0.58518 -5.96616 3.65738  
H -1.64799 -3.70836 3.91323  
H -0.87610 -1.80189 2.53237  
H 4.87346 4.15846 -0.05707  
H 5.76949 2.62277 0.01799  
H 5.79136 3.59342 -1.47237  
H 3.69199 3.10285 -4.43646  
H 5.24707 3.01089 -3.57726  
H 4.53707 1.54449 -4.29428  
H -0.77973 6.01146 2.98506  
H 0.12624 6.22676 1.46951  
H -1.62501 5.92183 1.42180  
H 0.51654 3.15901 4.95330  
H -0.57936 4.53274 4.67748  
H -1.24035 2.89487 4.88935

2ccc (from IRC)

SCF = -2340.29147879  
H(0 K)= -2339.396594  
G(298 K)= -2339.493025  
SCF(C6H6) = -2340.29921118  
BP86(D3BJ) = -2340.64148114  
Low Freq. = 4.5520cm<sup>-1</sup>, 14.3797cm<sup>-1</sup>

112

N -1.83008 2.02092 2.42616  
C -1.70914 1.59994 1.10181  
N -2.90257 2.05067 0.54528  
C -3.73278 2.68400 1.48151  
C -3.05381 2.66186 2.67330  
Ru -0.06477 0.60566 0.33214  
P -1.38275 -1.37190 -0.43816  
C -2.91391 -1.14274 -1.53174  
C -3.24410 2.00420 -0.86897  
C -0.79796 1.93008 3.46073  
C 0.06455 1.71588 -1.35614  
N 0.44275 1.33074 -2.64921  
C 0.48541 2.40550 -3.55109  
C 0.13587 3.52351 -2.83999  
N -0.10549 3.09910 -1.52243  
C 0.86300 -0.01045 -3.02785  
C -0.43941 4.04495 -0.46593  
P 2.28879 0.06684 0.49723  
C 3.38118 -1.27581 -0.28779  
C 3.52941 1.48875 0.34341  
C 2.35000 -0.39466 2.28536  
C 1.06596 -0.68880 2.85380  
C 1.04476 -1.19646 4.19464  
C 2.22066 -1.33517 4.93074  
C 3.47434 -0.99222 4.37574  
C 3.52568 -0.53491 3.05331  
O -0.06164 -0.49644 2.20589  
C -2.73231 -1.61713 2.05820  
C -2.18295 -2.33437 0.97388  
C -2.31363 -3.73833 0.95686  
C -2.97708 -4.40950 1.99832  
C -3.52920 -3.68664 3.06642

C -3.40774 -2.28749 3.08985  
C -0.58908 -2.81465 -1.36686  
H -2.61372 -0.53229 2.09581  
C 0.01348 4.95026 -3.27165  
C 0.86573 2.24169 -4.98810  
H -0.29119 3.54081 0.49769  
H -1.48760 4.38729 -0.53847  
H 0.22096 4.92595 -0.52846  
H 0.89543 -0.62613 -2.11944  
H 1.86596 0.01741 -3.48414  
H 0.16883 -0.47069 -3.75331  
H -3.82756 -1.71392 3.92375  
H -4.04764 -4.20967 3.87749  
H -3.06343 -5.50127 1.96832  
H -1.89863 -4.31635 0.12641  
H 4.49360 -0.27703 2.60801  
H 4.39110 -1.08436 4.96660  
H 2.16789 -1.71032 5.96018  
H 0.07163 -1.46148 4.62247  
H 0.68674 1.82002 1.08338  
C -3.45036 3.17514 4.02145  
C -5.08383 3.22249 1.13288  
H -4.14354 1.39316 -1.04549  
H -3.42450 3.02626 -1.24877  
H -2.39603 1.56340 -1.40179  
H 0.17552 1.82085 2.96684  
H -0.81282 2.85631 4.05842  
H -0.95517 1.06113 4.11664  
C 3.08343 2.82361 0.26329  
C 3.99477 3.89106 0.21280  
C 5.37600 3.64516 0.24432  
C 5.83632 2.32134 0.32155  
C 4.92396 1.25502 0.36435  
H 2.00771 3.01369 0.25036  
H 3.62176 4.91965 0.14879  
H 6.08800 4.47682 0.20698  
H 6.91168 2.11296 0.34702  
H 5.30523 0.23051 0.40429  
C 3.88017 -1.10293 -1.59831  
C 4.67633 -2.08435 -2.20759  
C 4.99631 -3.26354 -1.51365  
C 4.51152 -3.44761 -0.20911  
C 3.70742 -2.46574 0.39656  
H 3.67740 -0.16906 -2.13403  
H 5.05928 -1.92218 -3.22149  
H 5.62561 -4.02704 -1.98345  
H 4.76765 -4.35506 0.34969  
H 3.34884 -2.61263 1.42038  
C -2.76533 -0.56868 -2.81525  
C -3.87190 -0.35329 -3.65049  
C -5.16312 -0.69388 -3.21232  
C -5.32823 -1.25984 -1.93888  
C -4.21492 -1.48883 -1.11010  
H -1.77132 -0.27188 -3.16119  
H -3.72568 0.08736 -4.64301  
H -6.03001 -0.52198 -3.85926  
H -6.32810 -1.53611 -1.58587  
H -4.36315 -1.94204 -0.12618  
C -1.12473 -3.41379 -2.52678  
C -0.47274 -4.49834 -3.13882  
C 0.71491 -5.00943 -2.59413  
C 1.24975 -4.42767 -1.43307  
C 0.60652 -3.33661 -0.82983  
H -2.06094 -3.04389 -2.95368  
H -0.90410 -4.94819 -4.04021  
H 1.22137 -5.85592 -3.07039  
H 2.18081 -4.80704 -1.00147  
H 1.03234 -2.88620 0.07202  
H -5.03389 4.03295 0.38204  
H -5.74875 2.44056 0.72268  
H -5.57126 3.63615 2.02944  
H -2.80898 4.00861 4.36316  
H -4.48584 3.54900 3.99381  
H -3.39954 2.38779 4.79474  
H 0.18320 5.03389 -4.35648  
H -0.98783 5.36818 -3.05951  
H 0.75195 5.60617 -2.77361

H 0.21809 1.51478 -5.51187  
H 0.77987 3.20357 -5.51732  
H 1.90809 1.89214 -5.10811

2ccc (lowest conf)

SCF = -2340.30333676  
H(0 K)= -2339.408025  
G(298 K)= -2339.502086  
SCF(C6H6) = -2340.31030980  
BP86(D3BJ) = -2340.65899210  
Low Freq. = 16.5157cm-1, 20.5151cm-1

112

N -0.28162 -3.29959 0.73542  
C -0.14524 -1.91772 0.93640  
N -0.01191 -1.85288 2.32570  
C -0.06857 -3.10944 2.94182  
C -0.24632 -4.02653 1.93728  
Ru -0.17575 -0.46591 -0.47728  
C -2.00370 -1.21431 -1.11677  
N -2.37332 -1.49267 -2.42572  
C -3.61629 -2.13623 -2.50489  
C -4.06970 -2.26795 -1.21604  
N -3.08376 -1.70455 -0.39315  
C -1.53040 -1.28861 -3.60428  
C -3.21380 -1.70080 1.05836  
C 0.19851 -0.62965 3.08152  
C -0.48215 -3.95878 -0.55082  
P -1.20530 1.57396 0.44548  
C -0.51103 2.80325 1.71657  
C -1.31181 2.60673 -1.09127  
C -0.68812 2.02946 -2.24573  
C -0.72045 2.78763 -3.46068  
C -1.34112 4.03408 -3.51616  
C -1.95340 4.59402 -2.37205  
C -1.92664 3.87556 -1.17193  
O -0.08431 0.85744 -2.21914  
C 2.35556 2.67451 -0.87166  
C 3.09015 1.48265 -0.73739  
C 4.49151 1.52278 -0.92155  
C 5.13992 2.73176 -1.21087  
C 4.39602 3.91822 -1.33819  
C 3.00422 3.88525 -2.17297  
P 2.21316 -0.15099 -0.37277  
C 3.06943 -1.15288 -1.72393  
C -2.99779 1.55082 1.02732  
C 3.13341 -0.71219 1.16829  
H 1.26969 2.66182 -0.75777  
H 0.35990 -1.56397 -1.51394  
H 2.41093 4.79899 -1.28140  
H 4.90170 4.86130 -1.57283  
H 6.22709 2.74562 -1.34644  
H 5.07840 0.60120 -0.84733  
H -2.39543 4.30419 -0.27923  
H -2.43961 5.57347 -2.42134  
H -1.34921 4.58812 -4.46270  
H -0.23315 2.35716 -4.34239  
C -5.34978 -2.82623 -0.68057  
C -4.24618 -2.53577 -3.80137  
C -0.37465 -5.51614 1.99797  
C 0.07953 -3.29219 4.41875  
H -0.79274 -0.50780 -3.36617  
H -1.02185 -2.22978 -3.88234  
H -2.15785 -0.95908 -4.44775  
H -2.41431 -1.07695 1.46854  
H -4.18905 -1.28105 1.35145  
H -3.11570 -2.72464 1.46256  
H -1.55228 -4.16284 -0.73832  
H -0.10278 -3.28725 -1.33393  
H 0.07266 -4.91033 -0.57139  
H 0.03299 0.20959 2.39529  
H -0.51392 -0.56708 3.92178  
H 1.22856 -0.57764 3.47378  
C 2.57200 -0.97238 -3.03497  
C 3.17004 -1.63560 -4.11580  
C 4.26168 -2.49765 -3.90607

C 4.76032 -2.67850 -2.60832  
C 4.17367 -2.00207 -1.52189  
H 1.71778 -0.30249 -3.19140  
H 2.78081 -1.48041 -5.12838  
H 4.72237 -3.02039 -4.75141  
H 5.61425 -3.34276 -2.43373  
H 4.58385 -2.14342 -0.51709  
C 3.82034 0.18948 2.01057  
C 4.40394 -0.24725 3.21212  
C 4.31996 -1.59641 3.59100  
C 3.64563 -2.50624 2.75832  
C 3.05162 -2.06731 1.56446  
H 3.91323 1.24003 1.71825  
H 4.93366 0.47053 3.84813  
H 4.78260 -1.93860 4.52299  
H 3.57948 -3.56354 3.03756  
H 2.51652 -2.78428 0.93373  
C -1.26652 3.87259 2.25057  
C -0.68854 4.78888 3.14276  
C 0.65595 4.65231 3.52663  
C 1.41579 3.59135 3.01200  
C 0.83436 2.67784 2.11708  
H -2.32130 3.98424 1.98136  
H -1.29294 5.61169 3.54070  
H 1.10527 5.36635 4.22526  
H 2.46413 3.47040 3.30574  
H 1.43430 1.85262 1.72011  
C -3.32526 1.44160 2.39813  
C -4.65957 1.31124 2.81455  
C -5.69552 1.27683 1.86499  
C -5.38292 1.38146 0.49888  
C -4.04722 1.51810 0.08445  
H -2.52933 1.47577 3.15022  
H -4.89084 1.24170 3.88348  
H -6.73777 1.18144 2.18831  
H -6.18293 1.37042 -0.24998  
H -3.81174 1.61492 -0.98026  
H -5.18126 -3.64015 0.04810  
H -5.95497 -2.05329 -0.17185  
H -5.95826 -3.23711 -1.50133  
H -5.19747 -3.05844 -3.61521  
H -4.46822 -1.66334 -4.44350  
H -3.60163 -3.21576 -4.38720  
H -0.37039 -5.85289 3.04650  
H -1.31378 -5.87533 1.53866  
H 0.45627 -6.03419 1.48333  
H 0.02107 -4.36050 4.67994  
H 1.05191 -2.91148 4.78096  
H -0.70989 -2.76868 4.98921

8cct (lowest conf)

SCF = -2340.24984064  
H(0 K)= -2339.358599  
G(298 K)= -2339.451359  
SCF(C6H6) = -2340.25608673  
BP86(D3BJ) = -2340.61004571  
Low Freq. = 14.4994cm-1, 20.7437cm-1

112

N -2.97686 1.69261 -1.25213  
C -2.05736 1.59564 -0.21065  
N -2.64216 2.40265 0.76178  
C -3.85773 2.96008 0.34334  
C -4.07318 2.50610 -0.93308  
Ru -0.23603 0.59303 -0.11743  
C 0.54182 2.51579 -0.02903  
N 1.18580 3.17365 1.01635  
C 1.47618 4.51175 0.71615  
C 0.99653 4.73753 -0.54928  
N 0.44060 3.52591 -0.98226  
C 1.55636 2.57024 2.28805  
C -0.14191 3.36526 -2.30704  
C -2.08355 2.67514 2.07930  
C -2.84699 1.04303 -2.54821  
P 1.97112 -0.28629 -0.09868  
C 2.69723 -1.06666 1.47619

C 2.64227 -1.60966 -1.30389  
 C 1.93111 -2.81549 -1.49392  
 C 2.38426 -3.83043 -2.35142  
 C 3.59681 -3.66873 -3.03697  
 C 4.33262 -2.48748 -2.86403  
 C 3.85746 -1.47633 -2.01120  
 O 0.67156 -2.95220 -0.92991  
 C 0.46264 -3.43115 0.35363  
 C -0.66862 -2.87646 0.99302  
 C -1.03869 -3.41066 2.23999  
 C -0.27681 -4.42766 2.84371  
 C 0.86845 -4.92496 2.20304  
 C 1.24323 -4.43472 0.94181  
 P -1.45672 -1.42386 0.07841  
 C -2.11683 -2.43085 -1.39012  
 C 3.26867 1.03848 -0.46949  
 C -3.03385 -1.17638 1.08603  
 H -0.10946 0.55420 -1.80950  
 H -0.34094 0.55206 1.56621  
 H 2.12202 -4.82117 0.41722  
 H 1.47051 -5.70718 2.67725  
 H -0.57909 -4.82633 3.81778  
 H -1.92545 -3.02506 2.75194  
 H 4.44491 -0.56117 -1.89826  
 H 5.27970 -2.34433 -3.39506  
 H 3.95649 -4.45725 -3.70623  
 H 1.76579 -4.72403 -2.47875  
 C 1.01673 5.97321 -1.39146  
 C 2.20200 5.41665 1.65956  
 C -5.20963 2.74685 -1.87505  
 C -4.68849 3.84794 1.21383  
 H 2.64624 2.40812 2.34446  
 H 1.24453 3.22022 3.12352  
 H 1.03385 1.60342 2.34518  
 H 0.50539 3.84078 -3.06299  
 H -0.21444 2.27917 -2.48499  
 H -1.14821 3.81723 -2.36039  
 H -1.80645 0.68891 -2.61692  
 H -3.53172 0.18283 -2.63783  
 H -3.06478 1.76229 -3.35609  
 H -1.65852 3.69364 2.12630  
 H -2.86691 2.57088 2.84745  
 H -1.28749 1.93041 2.24045  
 C 1.92793 -1.04787 2.65431  
 C 2.42599 -1.59946 3.84694  
 C 3.70359 -2.17885 3.87692  
 C 4.47644 -2.21527 2.70376  
 C 3.97450 -1.67042 1.51158  
 H 0.92400 -0.60586 2.60518  
 H 1.80821 -1.58430 4.75180  
 H 4.09319 -2.61024 4.80569  
 H 5.47114 -2.67509 2.71426  
 H 4.58071 -1.72114 0.60094  
 C 4.32864 1.38193 0.39257  
 C 5.23517 2.40228 0.04742  
 C 5.10334 3.08399 -1.17096  
 C 4.05206 2.74557 -2.04161  
 C 3.13923 1.74055 -1.69009  
 H 4.45980 0.84377 1.33642  
 H 6.05316 2.65262 0.73248  
 H 5.81497 3.87087 -1.44387  
 H 3.94346 3.26684 -2.99948  
 H 2.31039 1.48540 -2.35950  
 C -2.95037 -3.55752 -1.22065  
 C -3.37190 -4.30884 -2.32969  
 C -2.95113 -3.95406 -3.62265  
 C -2.09610 -2.85385 -3.79696  
 C -1.68023 -2.10103 -2.68626  
 H -3.26591 -3.85686 -0.21514  
 H -4.02312 -5.17776 -2.18216  
 H -3.27745 -4.54220 -4.48759  
 H -1.74158 -2.58684 -4.79911  
 H -0.98136 -1.26240 -2.79766  
 C -2.91501 -0.74358 2.42684  
 C -4.05153 -0.48759 3.20941  
 C -5.33670 -0.62495 2.65721  
 C -5.46912 -1.02064 1.31827

C -4.32960 -1.30010 0.54279  
 H -1.91540 -0.58281 2.84386  
 H -3.93164 -0.17295 4.25249  
 H -6.22513 -0.42145 3.26504  
 H -6.46429 -1.12197 0.87072  
 H -4.45690 -1.62281 -0.49453  
 H 3.21106 5.03414 1.89911  
 H 2.32435 6.41498 1.21083  
 H 1.66596 5.54813 2.61784  
 H 0.00304 6.27642 -1.71168  
 H 1.44975 6.81222 -0.82433  
 H 1.62387 5.84767 -2.30727  
 H -5.96751 3.38891 -1.39935  
 H -4.88844 3.24993 -2.80622  
 H -5.70950 1.80631 -2.17047  
 H -5.05571 3.32091 2.11388  
 H -4.12927 4.73649 1.55971  
 H -5.57018 4.20652 0.65969

8cct (from IRC)

SCF = -2340.24915289  
 H(0 K) = -2339.357411  
 G(298 K) = -2339.449754  
 SCF(C6H6) = -2340.25528816  
 BP86(D3BJ) = -2340.60901768  
 Low Freq. = 14.0192cm-1, 22.5571cm-1

112

N -2.27662 2.38695 1.30035  
 C -1.54931 2.02919 0.16580  
 N -2.04228 2.91982 -0.78492  
 C -3.02264 3.77747 -0.26743  
 C -3.17320 3.43603 1.05367  
 Ru -0.02648 0.62723 -0.04390  
 P -1.70925 -1.04624 -0.18982  
 C -3.19200 -0.94893 0.98901  
 C -1.58697 2.99901 -2.16657  
 C -2.17140 1.77271 2.62067  
 C 1.19854 2.28966 -0.23846  
 N 1.92361 2.74548 -1.33829  
 C 2.53709 3.98328 -1.10400  
 C 2.19817 4.35121 0.17386  
 N 1.39789 3.31801 0.68038  
 C 2.10160 2.02976 -2.59552  
 C 0.89209 3.31829 2.04596  
 P 1.84193 -0.79558 0.13873  
 C 2.13812 -2.22084 -1.06614  
 C 3.51510 0.07500 -0.02790  
 C 2.17524 -1.66945 1.80265  
 C 1.12073 -2.24958 2.54778  
 C 1.30610 -2.74058 3.84970  
 C 2.58166 -2.71781 4.43205  
 C 3.66171 -2.21122 3.69581  
 C 3.45305 -1.69289 2.40646  
 O -0.16821 -2.30415 2.02540  
 C -0.42017 -3.26647 1.04797  
 C -1.24715 -2.87551 -0.02647  
 C -1.56268 -3.86384 -0.98277  
 C -1.08036 -5.17726 -0.87082  
 C -0.25866 -5.53270 0.20884  
 C 0.07423 -4.57503 1.17575  
 C -2.71875 -1.16354 -1.80140  
 H 0.08646 0.59807 1.63001  
 C 2.54871 5.57301 0.96224  
 C 3.39932 4.66566 -2.11732  
 H 1.69156 3.61985 2.74422  
 H 0.56247 2.28687 2.25587  
 H 0.03901 4.01036 2.15876  
 H 3.13768 1.66439 -2.69188  
 H 1.86730 2.69195 -3.44702  
 H 1.40169 1.17896 -2.57534  
 H 0.71210 -4.82828 2.02756  
 H 0.12513 -6.55406 0.30324  
 H -1.34117 -5.91702 -1.63462  
 H -2.18392 -3.59836 -1.84148



|   |          |          |          |
|---|----------|----------|----------|
| C | 0.78593  | -3.13549 | -1.85548 |
| C | 0.66117  | -4.40768 | -2.43796 |
| C | 1.01531  | -5.55266 | -1.70599 |
| C | 1.48683  | -5.41945 | -0.38946 |
| C | 1.61543  | -4.14770 | 0.19139  |
| H | 0.49915  | -2.24124 | -2.41849 |
| H | 0.28140  | -4.50269 | -3.46116 |
| H | 0.91776  | -6.54616 | -2.15722 |
| H | 1.75566  | -6.30989 | 0.18962  |
| H | 1.97548  | -4.04738 | 1.22035  |
| C | 4.16858  | -0.11407 | 0.30091  |
| C | 5.50399  | 0.09463  | -0.07530 |
| C | 6.08235  | -0.67895 | -1.09710 |
| C | 5.31252  | -1.66656 | -1.73045 |
| C | 3.97499  | -1.87684 | -1.35029 |
| H | 3.73322  | 0.48900  | 1.10290  |
| H | 6.09577  | 0.86182  | 0.43614  |
| H | 7.12662  | -0.51992 | -1.38759 |
| H | 5.75271  | -2.28615 | -2.51983 |
| H | 3.39411  | -2.65708 | -1.85072 |
| H | 4.39187  | 4.28344  | 1.74471  |
| H | 4.70700  | 5.13772  | 0.21753  |
| H | 3.20271  | 5.44722  | 1.11645  |
| H | 4.15332  | 3.80047  | -3.17962 |
| H | 5.19292  | 4.29239  | -1.82212 |
| H | 5.25690  | 2.62038  | -2.43126 |
| H | -3.96800 | 4.41680  | 1.85116  |
| H | -2.49389 | 5.24799  | 2.40145  |
| H | -3.42107 | 5.89984  | 1.02929  |
| H | -2.87000 | 6.29174  | -1.13153 |
| H | -1.40563 | 6.01191  | -2.10297 |
| H | -2.93155 | 5.21134  | -2.54274 |

2ccct (from IRC)

SCF = -2340.30176695  
H(0 K) = -2339.406466  
G(298 K) = -2339.501417  
SCF(C6H6) = -2340.30851034  
BP86(D3BJ) = -2340.65831393  
Low Freq. = 15.6813cm<sup>-1</sup>, 20.5404cm<sup>-1</sup>

112

|    |          |          |          |
|----|----------|----------|----------|
| N  | -2.15877 | 2.76327  | 0.70311  |
| C  | -1.66482 | 1.85533  | -0.21877 |
| N  | -2.39137 | 2.16883  | -1.36199 |
| C  | -3.28715 | 3.22751  | -1.15099 |
| C  | -3.13541 | 3.60887  | 0.15823  |
| Ru | -0.12168 | 0.49689  | 0.01149  |
| P  | -1.73812 | -1.22792 | 0.08985  |
| C  | -3.55487 | -0.69641 | 0.10088  |
| C  | -2.30598 | 1.48274  | -2.64448 |
| C  | -1.73269 | 2.84413  | 2.09677  |
| C  | 1.09416  | 2.21199  | 0.17301  |
| N  | 1.40788  | 3.11662  | -0.83689 |
| C  | 2.18906  | 4.18635  | -0.38138 |
| C  | 2.38458  | 3.97778  | 0.96042  |
| N  | 1.71286  | 2.78726  | 1.27587  |
| C  | 1.01805  | 3.00486  | -2.23676 |
| C  | 1.68761  | 2.26759  | 2.64081  |
| P  | 1.91485  | -0.75765 | -0.21144 |
| C  | 2.01950  | -2.59921 | -0.64247 |
| C  | 2.91776  | 0.01965  | -1.60155 |
| C  | 3.20270  | -0.88535 | 1.17202  |
| C  | 2.73732  | -0.86982 | 2.50233  |
| C  | 3.62520  | -1.08922 | 3.57088  |
| C  | 4.98673  | -1.32056 | 3.32456  |
| C  | 5.45692  | -1.34916 | 2.00016  |
| C  | 4.57048  | -1.14514 | 0.93215  |
| O  | -0.37668 | 0.12670  | 2.28482  |
| C  | -0.89887 | -1.01675 | 2.69270  |
| C  | -1.56593 | -1.92621 | 1.79920  |
| C  | -2.07192 | -3.15351 | 2.27468  |
| C  | -1.94180 | -3.51947 | 3.62106  |
| C  | -1.31498 | -2.62508 | 4.51392  |
| C  | -0.80890 | -1.40314 | 4.06819  |
| C  | -1.87363 | -2.64884 | -1.12811 |

|   |          |          |          |
|---|----------|----------|----------|
| H | 1.67529  | -0.68404 | 2.69196  |
| C | 3.13660  | 4.77908  | 1.97478  |
| C | 2.66773  | 5.28188  | -1.27967 |
| H | 2.69651  | 1.94816  | 2.95128  |
| H | 0.99755  | 1.41221  | 2.68773  |
| H | 1.33771  | 3.05581  | 3.33057  |
| H | 1.91159  | 3.01896  | -2.88261 |
| H | 0.34520  | 3.83360  | -2.51979 |
| H | 0.49991  | 2.04255  | -2.34712 |
| H | -0.31759 | -0.71010 | 4.76081  |
| H | -1.21583 | -2.89337 | 5.57270  |
| H | -2.32427 | -4.48323 | 3.97176  |
| H | -2.55916 | -3.84394 | 1.57861  |
| H | 4.94625  | -1.20026 | -0.09459 |
| H | 6.51598  | -1.54357 | 1.79658  |
| H | 5.67835  | -1.48917 | 4.15729  |
| H | 3.24494  | -1.08233 | 4.59838  |
| H | 0.02490  | 0.54142  | -1.57340 |
| C | -3.82924 | 4.66940  | 0.95168  |
| C | -4.21073 | 3.73022  | -2.21364 |
| H | -1.57948 | 0.66582  | -2.53286 |
| H | -3.29084 | 1.07499  | -2.92505 |
| H | -1.96311 | 2.17316  | -3.43569 |
| H | -1.22977 | 1.89938  | 2.35974  |
| H | -1.04836 | 3.69785  | 2.24990  |
| H | -2.61509 | 2.97986  | 2.74357  |
| C | -4.11545 | -0.16717 | 1.28293  |
| C | -5.44309 | 0.28909  | 1.30728  |
| C | -6.23679 | 0.22508  | 0.15010  |
| C | -5.69161 | -0.30218 | -1.03143 |
| C | -4.36221 | -0.75793 | -1.05476 |
| H | -3.51183 | -0.13491 | 2.19593  |
| H | -5.86305 | 0.68265  | 2.23987  |
| H | -7.27582 | 0.57139  | 0.17258  |
| H | -6.30589 | -0.37512 | -1.93633 |
| H | -3.95853 | -1.18917 | -1.97680 |
| C | -0.98289 | -2.67069 | -2.21919 |
| C | -1.05336 | -3.68530 | -3.18799 |
| C | -2.02192 | -4.69474 | -3.07796 |
| C | -2.93076 | -4.67368 | -2.00646 |
| C | -2.86488 | -3.65307 | -1.04518 |
| H | -0.23466 | -1.87479 | -2.29394 |
| H | -0.34745 | -3.68890 | -4.02540 |
| H | -2.07693 | -5.49006 | -3.82924 |
| H | -3.70163 | -5.44784 | -1.92418 |
| H | -3.61123 | -3.62187 | -0.24533 |
| C | 1.25053  | -3.47930 | 0.14850  |
| C | 1.34293  | -4.86798 | -0.02689 |
| C | 2.19845  | -5.40220 | -1.00372 |
| C | 2.97153  | -4.53630 | -1.79217 |
| C | 2.89102  | -3.14536 | -1.60739 |
| H | 0.57268  | -3.07759 | 0.90994  |
| H | 0.73621  | -5.53068 | 0.59914  |
| H | 2.26521  | -6.48615 | -1.14692 |
| H | 3.65004  | -4.94135 | -2.55157 |
| H | 3.51805  | -2.48968 | -2.21880 |
| C | 3.91742  | 0.98186  | -1.34765 |
| C | 4.57583  | 1.63657  | -2.40374 |
| C | 4.24809  | 1.34061  | -3.73647 |
| C | 3.24372  | 0.39434  | -4.00411 |
| C | 2.58084  | -0.24907 | -2.94772 |
| H | 4.18745  | 1.22409  | -0.31535 |
| H | 5.35491  | 2.37372  | -2.17923 |
| H | 4.77034  | 1.84027  | -4.55950 |
| H | 2.97376  | 0.15581  | -5.03885 |
| H | 1.79133  | -0.97329 | -3.17319 |
| H | 3.93932  | 4.19175  | 2.45664  |
| H | 3.60586  | 5.65307  | 1.49656  |
| H | 2.48198  | 5.15541  | 2.78267  |
| H | 1.83223  | 5.82623  | -1.75708 |
| H | 3.25552  | 6.01550  | -0.70591 |
| H | 3.31292  | 4.89816  | -2.09111 |
| H | -4.43874 | 4.24574  | 1.77131  |
| H | -3.11798 | 5.38204  | 1.40738  |
| H | -4.50737 | 5.24614  | 0.30331  |
| H | -4.78775 | 4.59042  | -1.83970 |
| H | -3.67049 | 4.06106  | -3.11960 |

H -4.93588 2.95673 -2.52749  
 2ccc (lowest conf)  
 SCF = -2340.31015976  
 H(0 K)= -2339.414533  
 G(298 K)= -2339.508299  
 SCF(C6H6) = -2340.31645484  
 BP86(D3BJ) = -2340.67031969  
 Low Freq. = 12.9425cm-1, 23.7055cm-1

112  
 N -2.26663 2.76804 0.63586  
 C -1.78808 1.82398 -0.26166  
 N -2.61558 2.01844 -1.36212  
 C -3.56138 3.03113 -1.14957  
 C -3.33621 3.51198 0.11629  
 Ru -0.13357 0.57855 -0.06878  
 P -1.60356 -1.29101 0.11589  
 C -3.35462 -1.24169 -0.60626  
 C -2.57067 1.26362 -2.60840  
 C -1.71060 3.01869 1.96383  
 C 0.95364 2.35931 0.03464  
 N 1.06501 3.34110 -0.94843  
 C 1.81113 4.44899 -0.52059  
 C 2.19802 4.17692 0.76758  
 N 1.66558 2.91998 1.08514  
 C 0.48308 3.27406 -2.28274  
 C 1.92292 2.28857 2.37860  
 P 1.89454 -0.67786 -0.22822  
 C 2.50402 -1.17871 -1.94917  
 C 3.51267 -0.15286 0.31586  
 C 2.03986 -2.28271 0.74222  
 C 1.64752 -2.21750 2.09893  
 C 1.76126 -3.34360 2.92982  
 C 2.24936 -4.55511 2.41368  
 C 2.61199 -4.63492 1.06017  
 C 2.51186 -3.50686 0.22862  
 O -0.31960 0.36227 2.20490  
 C -1.20807 -0.46585 2.72203  
 C -1.98322 -1.36571 1.91879  
 C -2.97088 -2.18606 2.50833  
 C -3.18839 -2.17695 3.89164  
 C -2.40437 -1.32289 4.69848  
 C -1.43944 -0.48713 4.13585  
 C -1.12252 -3.03793 -0.38887  
 H 1.23488 -1.28058 2.48882  
 C 3.03801 4.96477 1.72124  
 C 2.06966 5.64209 -1.38501  
 H 1.28137 1.40148 2.47676  
 H 1.67293 2.99607 3.18809  
 H 2.98705 2.01153 2.46084  
 H 1.22972 3.57539 -3.03637  
 H -0.39886 3.93361 -2.36724  
 H 0.17886 2.23078 -2.44820  
 H -0.84235 0.18632 4.76131  
 H -2.56196 -1.30601 5.78391  
 H -3.95711 -2.81626 4.33716  
 H -3.58593 -2.82910 1.86735  
 H 2.79173 -3.59088 -0.82484  
 H 2.97413 -5.58104 0.64306  
 H 2.33357 -5.43602 3.05953  
 H 1.45202 -3.27315 3.97815  
 H -0.05644 0.63628 -1.65977  
 C -4.02951 4.58838 0.88920  
 C -4.59508 3.39707 -2.16624  
 H -3.51581 0.71923 -2.76619  
 H -2.39351 1.94286 -3.46154  
 H -1.73873 0.55127 -2.52600  
 H -1.06322 2.16760 2.22944  
 H -1.13466 3.96139 1.97216  
 H -2.52832 3.09544 2.69935  
 C -4.28627 -0.34886 -0.03082  
 C -5.58101 -0.21884 -0.55649  
 C -5.97422 -0.98313 -1.66921  
 C -5.06268 -1.88487 -2.24049  
 C -3.76565 -2.01280 -1.71336

H -3.99524 0.23902 0.84548  
 H -6.28783 0.47497 -0.08773  
 H -6.98704 -0.88803 -2.07577  
 H -5.36109 -2.50125 -3.09598  
 H -3.07565 -2.73339 -2.16282  
 C -1.19352 -4.14212 0.48356  
 C -0.85442 -5.42882 0.03379  
 C -0.44344 -5.63458 -1.29260  
 C -0.35240 -4.53928 -2.16621  
 C -0.68180 -3.25157 -1.71335  
 H -1.50257 -3.99365 1.52196  
 H -0.91094 -6.27437 0.72805  
 H -0.18400 -6.64040 -1.64050  
 H -0.01461 -4.68159 -3.19857  
 H -0.58381 -2.39975 -2.39370  
 C 3.80803 -1.69061 -2.14080  
 C 4.26034 -2.04595 -3.42107  
 C 3.42200 -1.88421 -4.53707  
 C 2.13198 -1.36065 -4.36228  
 C 1.67985 -1.01116 -3.07801  
 H 4.48026 -1.80039 -1.28355  
 H 5.27388 -2.44230 -3.54734  
 H 3.77769 -2.15574 -5.53699  
 H 1.47491 -1.21700 -5.22757  
 H 0.68624 -0.57385 -2.92950  
 C 4.28369 -0.27622 1.41560  
 C 5.46300 0.40101 1.77544  
 C 5.89221 1.51747 1.04158  
 C 5.13619 1.94862 -0.06298  
 C 3.96085 1.27193 -0.42124  
 C 3.96708 -1.14777 1.99600  
 H 6.04880 0.04622 2.63081  
 H 6.81316 2.04158 1.31942  
 H 5.46497 2.81216 -0.65172  
 H 3.38423 1.61415 -1.28699  
 H 3.35264 5.91323 1.25826  
 H 2.49699 5.21317 2.65272  
 H 3.95113 4.41325 2.00941  
 H 2.65628 5.39040 -2.28822  
 H 1.13366 6.11971 -1.72868  
 H 2.64006 6.39911 -0.82434  
 H -4.51775 4.19999 1.80216  
 H -3.33443 5.38666 1.20751  
 H -4.81142 5.05658 0.27096  
 H -5.25953 2.54398 -2.39578  
 H -5.22469 4.21888 -1.79075  
 H -4.14825 3.73093 -3.12080

8tcc (lowest conf)  
 SCF = -2340.24967380  
 H(0 K)= -2339.356642  
 G(298 K)= -2339.449683  
 SCF(C6H6) = -2340.25554725  
 BP86(D3BJ) = -2340.60806019  
 Low Freq. = 16.1417cm-1, 24.0047cm-1

112  
 C -0.56287 0.81797 3.00381  
 C -1.47887 1.50354 2.16583  
 C -1.89337 2.78319 2.58567  
 C -1.40318 3.36677 3.76774  
 C -0.46584 2.67668 4.55017  
 C -0.03789 1.39330 4.17197  
 P -1.84041 0.75453 0.45279  
 C -2.97589 2.11782 -0.22253  
 O -0.24047 -0.44980 2.55708  
 C 0.84977 -1.19216 2.99346  
 C 1.85337 -1.50645 2.04669  
 C 2.86369 -2.39688 2.47745  
 C 2.88498 -2.93041 3.77524  
 C 1.86946 -2.60143 4.68713  
 C 0.83872 -1.73973 4.29009  
 P 1.81503 -0.77528 0.26180  
 C 2.80925 -2.16689 -0.58056  
 Ru -0.08042 0.00419 -0.99985  
 C 0.71570 1.90983 -1.39796

N 0.91801 2.43115 -2.67896  
 C 1.47585 3.71957 -2.66101  
 C 1.63238 4.05130 -1.33879  
 N 1.16833 2.95667 -0.60071  
 C 0.61614 1.72473 -3.91843  
 C 1.21450 2.94153 0.85264  
 C -0.94191 -1.87357 -1.38838  
 N -1.28550 -2.34376 -2.65657  
 C -1.88042 -3.61485 -2.62483  
 C -1.91496 -3.99127 -1.30556  
 N -1.34634 -2.93558 -0.58247  
 C -1.06252 -1.61460 -3.89936  
 C -1.16641 -2.99527 0.85882  
 C 3.25091 0.44776 0.47110  
 C -3.22205 -0.45373 0.91714  
 C 1.79990 4.50704 -3.89160  
 C 2.18156 5.28519 -0.69668  
 C -2.44395 -5.22756 -0.65107  
 C -2.35993 -4.34104 -3.84224  
 H -2.11019 -3.28012 1.35067  
 H -0.87493 -1.99588 1.19550  
 H -0.37860 -3.72219 1.12697  
 H -0.06771 -1.15060 -3.85835  
 H -1.81123 -0.81382 -4.02699  
 H -1.12513 -2.31487 -4.74574  
 H -0.38319 1.27431 -3.83969  
 H 1.34099 0.91113 -4.09123  
 H 0.65146 2.43574 -4.75709  
 H 0.51285 3.67642 1.28122  
 H 2.23649 3.15598 1.20369  
 H 0.92082 1.93864 1.17907  
 H 0.00927 -1.49919 4.96206  
 H 1.86686 -3.02614 5.69647  
 H 3.69201 -3.60971 4.06942  
 H 3.65407 -2.67881 1.77536  
 H -2.59953 3.34276 1.96537  
 H -1.74829 4.36171 4.06762  
 H -0.06369 3.12924 5.46290  
 H 0.69219 0.84595 4.77414  
 H -1.12189 0.43667 -2.16927  
 H 0.88635 -0.40671 -2.24775  
 C -3.61143 -0.73785 2.24175  
 C -4.63226 -1.66787 2.50808  
 C -5.28724 -2.32063 1.45187  
 C -4.91699 -2.03344 0.12567  
 C -3.89144 -1.11288 -0.13742  
 H -3.12212 -0.22218 3.07418  
 H -4.92020 -1.87450 3.54515  
 H -6.08706 -3.04018 1.65858  
 H -5.42837 -2.52846 -0.70742  
 H -3.59901 -0.90072 -1.17149  
 C -4.27439 2.33492 0.29122  
 C -5.09183 3.35398 -0.22381  
 C -4.62541 4.17563 -1.26335  
 C -3.33818 3.96825 -1.78272  
 C -2.52231 2.94594 -1.26814  
 H -4.65308 1.69830 1.09748  
 H -6.09696 3.50252 0.18654  
 H -5.26444 4.96794 -1.66858  
 H -2.96704 4.59891 -2.59851  
 H -1.52846 2.76608 -1.68622  
 C 3.84305 0.78532 1.70552  
 C 4.87301 1.74109 1.77483  
 C 5.33659 2.36826 0.60809  
 C 4.76186 2.03196 -0.63100  
 C 3.72661 1.08771 -0.69623  
 H 3.50280 0.29988 2.62491  
 H 5.31634 1.98866 2.74599  
 H 6.14393 3.10692 0.66078  
 H 5.11890 2.50882 -1.55048  
 H 3.27202 0.83822 -1.66076  
 C 4.22025 -2.18346 -0.64612  
 C 4.90351 -3.23609 -1.28045  
 C 4.19049 -4.29926 -1.85408  
 C 2.78762 -4.29758 -1.79135  
 C 2.10678 -3.24060 -1.16703  
 H 4.79694 -1.36614 -0.20360

H 5.99849 -3.22069 -1.32259  
 H 4.72231 -5.11940 -2.34870  
 H 2.21605 -5.11860 -2.23872  
 H 1.01484 -3.23492 -1.15195  
 H -3.12135 -3.76765 -4.40226  
 H -1.54057 -4.57453 -4.54770  
 H -2.81947 -5.29828 -3.54953  
 H -1.66783 -5.75787 -0.06940  
 H -3.27430 -4.99911 0.04220  
 H -2.82604 -5.92940 -1.40912  
 H 2.52675 3.99051 -4.54527  
 H 0.90513 4.72553 -4.50422  
 H 2.24384 5.47456 -3.60888  
 H 2.46269 6.02423 -1.46345  
 H 1.44779 5.76673 -0.02469  
 H 3.08351 5.06768 -0.09569

8ctc

SCF = -2340.23079832  
 H(0 K) = -2339.339647  
 G(298 K) = -2339.434508  
 SCF(C6H6) = -2340.23701167  
 BP86(D3BJ) = -2340.58056840  
 Low Freq. = 13.0108cm<sup>-1</sup>, 19.1969cm<sup>-1</sup>

112

N -0.67225 -0.33438 3.23896  
 C -0.72768 -0.96775 1.99674  
 N -1.47480 -2.10837 2.30837  
 C -1.85459 -2.16853 3.65740  
 C -1.34076 -1.04211 4.24852  
 Ru -0.02857 -0.28789 0.07654  
 C 0.41288 -2.18780 -0.79745  
 N 0.26668 -2.62203 -2.11777  
 C 0.82422 -3.89097 -2.34299  
 C 1.34906 -4.30055 -1.14359  
 N 1.09085 -3.26768 -0.23072  
 C -0.32920 -1.84214 -3.19483  
 C 1.55591 -3.30578 1.14656  
 C -1.91034 -3.10723 1.34448  
 C -0.05713 0.96133 3.50101  
 P 2.07331 0.58529 0.16270  
 C 3.47450 -0.28236 -0.76958  
 C 2.31927 2.31667 -0.61732  
 C 1.30919 3.18573 -1.10705  
 C 1.61328 4.50597 -1.50263  
 C 2.93403 4.96793 -1.50286  
 C 3.96230 4.10548 -1.09316  
 C 3.64449 2.81506 -0.65065  
 O -0.02875 2.80425 -1.11813  
 C -0.68514 2.50984 -2.30328  
 C -1.80364 1.63584 -2.19395  
 C -2.56934 1.41333 -3.35627  
 C -2.22359 1.98168 -4.59450  
 C -1.07963 2.78389 -4.68807  
 C -0.31000 3.05235 -3.54442  
 P -2.04370 0.61072 -0.62417  
 C -2.87221 1.83558 0.54006  
 C 2.89244 0.92946 1.83586  
 C -3.61438 -0.35269 -1.11378  
 H -0.16258 1.20456 0.74002  
 H 0.38754 0.22497 -1.42556  
 H 0.57765 3.68517 -3.61623  
 H -0.78048 3.21732 -5.64860  
 H -2.83882 1.78214 -5.47788  
 H -3.44145 0.75611 -3.29625  
 H 4.45344 2.16348 -0.30460  
 H 5.00511 4.43903 -1.09928  
 H 3.15483 5.99246 -1.82046  
 H 0.78864 5.15873 -1.80440  
 C 2.07661 -5.55265 -0.77087  
 C 0.79534 -4.56748 -3.67637  
 C -1.40590 -0.57092 5.66661  
 C -2.65857 -3.29326 4.22808  
 H 0.39676 -1.70197 -4.01506  
 H -1.22735 -2.33960 -3.60069



|   |          |          |          |    |          |          |          |
|---|----------|----------|----------|----|----------|----------|----------|
| H | -0.59764 | -0.85915 | -2.78586 | C  | -0.84634 | -3.97160 | -2.34411 |
| H | 2.65617  | -3.39738 | 1.18064  | Ru | 0.03640  | -0.29456 | -0.09033 |
| H | 1.24569  | -2.35925 | 1.61350  | C  | 0.78225  | -1.59310 | 1.43805  |
| H | 1.11363  | -4.15760 | 1.69370  | N  | 0.58599  | -1.58444 | 2.81779  |
| H | 0.84593  | 0.85704  | 4.12534  | C  | 1.26737  | -2.62099 | 3.47314  |
| H | 0.21083  | 1.39516  | 2.52959  | C  | 1.94024  | -3.31581 | 2.49991  |
| H | -0.78046 | -1.62444 | 4.00459  | N  | 1.64391  | -2.67935 | 1.28564  |
| H | -1.47060 | -2.83326 | 0.37706  | C  | -0.19639 | -0.59482 | 3.54828  |
| H | -1.56883 | -4.11526 | 1.64033  | C  | 2.29527  | -3.06612 | 0.03955  |
| H | -3.01049 | -3.11538 | 1.25606  | C  | 1.14218  | -1.16397 | -3.45468 |
| C | 3.20766  | -0.66843 | -2.10304 | C  | -1.56487 | -3.44598 | -0.00316 |
| C | 4.17868  | -1.32695 | -2.87081 | P  | -2.12430 | 0.40422  | 0.16986  |
| C | 5.43598  | -1.62767 | -2.31898 | C  | -3.03763 | 0.18430  | 1.81309  |
| C | 5.71358  | -1.25058 | -0.99640 | C  | -2.45942 | 2.28417  | -0.04392 |
| C | 4.74509  | -0.57792 | -0.23022 | C  | -1.47867 | 3.30509  | -0.14432 |
| H | 2.22421  | -0.44499 | -2.52963 | C  | -1.83721 | 4.65150  | -0.36570 |
| H | 3.95314  | -1.60727 | -3.90599 | C  | -3.18294 | 5.02528  | -0.44473 |
| H | 6.19315  | -2.14636 | -2.91694 | C  | -4.17677 | 4.04211  | -0.32061 |
| H | 6.69342  | -1.46872 | -0.55632 | C  | -3.80811 | 2.70344  | -0.13451 |
| H | 4.98966  | -0.27677 | 0.79310  | O  | -0.13034 | 2.98570  | -0.16650 |
| C | 3.00236  | 2.21864  | 2.40143  | C  | 0.74668  | 3.27864  | 0.86004  |
| C | 3.46436  | 2.39451  | 3.71740  | C  | 1.92449  | 2.48361  | 0.86620  |
| C | 3.84036  | 1.28731  | 4.49349  | C  | 2.92970  | 2.81371  | 1.79101  |
| C | 3.73808  | -0.00357 | 3.94401  | C  | 2.74846  | 3.84493  | 2.73186  |
| C | 3.25441  | -0.17726 | 2.63892  | C  | 1.54511  | 4.56259  | 2.75365  |
| H | 2.71991  | 3.09720  | 1.81430  | C  | 0.53766  | 4.28765  | 1.81235  |
| H | 3.53353  | 3.40585  | 4.13370  | P  | 1.94346  | 1.00864  | -0.32408 |
| H | 4.20781  | 1.42597  | 5.51593  | C  | 2.35685  | 2.03504  | -1.86811 |
| H | 4.02842  | -0.87857 | 4.53657  | C  | -3.42618 | -0.21944 | -1.06096 |
| H | 3.14932  | -1.18921 | 2.23525  | C  | 3.61200  | 0.22147  | 0.05288  |
| C | -3.06324 | 3.19403  | 0.22074  | H  | -0.38531 | 0.58698  | -1.41985 |
| C | -3.67116 | 4.06799  | 1.13954  | H  | -0.03566 | 0.79486  | 1.12835  |
| C | -4.10856 | 3.59319  | 2.38515  | H  | -0.39399 | 4.85991  | 1.80876  |
| C | -3.93444 | 2.23592  | 2.70772  | H  | 1.38591  | 5.35465  | 3.49336  |
| C | -3.31765 | 1.36666  | 1.79561  | H  | 3.54405  | 4.07511  | 3.44815  |
| H | -2.73940 | 3.57361  | -0.75328 | H  | 3.86332  | 2.24303  | 1.79403  |
| H | -3.80740 | 5.12252  | 0.87452  | H  | -4.59720 | 1.94866  | -0.06606 |
| H | -4.58571 | 4.27350  | 3.09892  | H  | -5.23627 | 4.31131  | -0.38311 |
| H | -4.28184 | 1.85191  | 3.67361  | H  | -3.45035 | 6.07350  | -0.61513 |
| H | -3.17789 | 0.31308  | 2.05921  | H  | -1.03672 | 5.38684  | -0.49126 |
| C | -3.47207 | -1.70132 | -1.49564 | C  | 2.84528  | -4.50248 | 2.59807  |
| C | -4.58840 | -2.47528 | -1.85499 | C  | 1.19530  | -2.83519 | 4.95176  |
| C | -5.87338 | -1.90966 | -1.82490 | C  | -1.55187 | -5.29008 | -2.36373 |
| C | -6.03154 | -0.56751 | -1.43985 | C  | 0.24826  | -3.75445 | -4.70076 |
| C | -4.91214 | 0.20523  | -1.08970 | H  | -0.43224 | 0.21695  | 2.84908  |
| H | -2.46883 | -2.14094 | -1.49360 | H  | -1.13410 | -1.02501 | 3.93831  |
| H | -4.45570 | -3.52251 | -2.15027 | H  | 0.39545  | -0.19330 | 4.38833  |
| H | -6.74781 | -2.51145 | -2.09571 | H  | 3.37686  | -3.19518 | 0.20838  |
| H | -7.03111 | -0.11907 | -1.41203 | H  | 1.87147  | -4.00252 | -0.36553 |
| H | -5.04817 | 1.25061  | -0.79378 | H  | 2.13204  | -2.25496 | -0.68047 |
| H | 1.27162  | -5.55844 | -3.61147 | H  | -1.45046 | -2.58314 | 0.66917  |
| H | -0.23524 | -4.71818 | -4.04788 | H  | -2.63442 | -3.62817 | -0.20783 |
| H | 1.33660  | -3.99102 | -4.44936 | H  | -1.13253 | -4.34359 | 0.47351  |
| H | 3.10727  | -5.34766 | -0.42681 | H  | 1.55667  | -0.47423 | -2.70792 |
| H | 1.56780  | -6.10872 | 0.03847  | H  | 1.95890  | -1.68823 | -3.97833 |
| H | 2.14786  | -6.22597 | -1.63958 | H  | 0.56482  | -0.57872 | -4.19227 |
| H | -1.92802 | 0.39894  | 5.76247  | C  | -3.52418 | -1.09037 | 2.18793  |
| H | -1.94914 | -1.30133 | 6.28687  | C  | -4.06616 | -1.31625 | 3.46226  |
| H | -0.40035 | -0.44114 | 6.10706  | C  | -4.11039 | -0.27555 | 4.40751  |
| H | -3.64528 | -3.39280 | 3.73901  | C  | -3.61895 | 0.99153  | 4.05573  |
| H | -2.14751 | -4.26903 | 4.12636  | C  | -3.09593 | 1.22005  | 2.77177  |
| H | -2.83870 | -3.12622 | 5.30173  | H  | -3.48494 | -1.91586 | 1.47045  |
|   |          |          |          | H  | -4.45354 | -2.30892 | 3.71868  |
|   |          |          |          | H  | -4.52659 | -0.45147 | 5.40517  |
|   |          |          |          | H  | -3.64810 | 1.81262  | 4.78089  |
|   |          |          |          | H  | -2.72598 | 2.21724  | 2.51338  |
|   |          |          |          | C  | -4.76192 | -0.54056 | -0.72964 |
|   |          |          |          | C  | -5.65514 | -1.01219 | -1.70728 |
|   |          |          |          | C  | -5.23632 | -1.15937 | -3.03843 |
|   |          |          |          | C  | -3.91314 | -0.83509 | -3.38275 |
|   |          |          |          | C  | -3.01765 | -0.37874 | -2.40407 |
|   |          |          |          | H  | -5.11436 | -0.42412 | 0.30000  |
|   |          |          |          | H  | -6.68528 | -1.25675 | -1.42404 |
|   |          |          |          | H  | -5.93411 | -1.52217 | -3.80094 |
|   |          |          |          | H  | -3.57391 | -0.94300 | -4.41919 |
|   |          |          |          | H  | -1.97965 | -0.14851 | -2.66549 |
|   |          |          |          | C  | 1.40107  | 2.19968  | -2.88770 |

8ctc (from IRC)

SCF = -2340.22877312  
H(0 K)= -2339.338009  
G(298 K)= -2339.432098  
SCF(C6H6) = -2340.23482532  
BP86(D3BJ) = -2340.57999678  
Low Freq. = 16.5476cm-1, 22.1580cm-1

112

|   |          |          |          |
|---|----------|----------|----------|
| N | -0.85987 | -3.11619 | -1.23249 |
| C | -0.15472 | -1.93431 | -1.44497 |
| N | 0.30166  | -2.11586 | -2.74744 |
| C | -0.10759 | -3.33483 | -3.30996 |

C 1.66161 3.02595 -3.99421  
 C 2.88619 3.70340 -4.09592  
 C 3.84194 3.56264 -3.07530  
 C 3.57562 2.74359 -1.96751  
 H 0.43866 1.68457 -2.78544  
 H 0.90083 3.14469 -4.77400  
 H 3.09234 4.34634 -4.95865  
 H 4.79507 4.09978 -3.13603  
 H 4.32081 2.66061 -1.16955  
 C 3.86512 -0.26001 1.36117  
 C 5.00711 -1.02470 1.64441  
 C 5.91496 -1.35350 0.62211  
 C 5.66548 -0.90425 -0.68556  
 C 4.53040 -0.12674 -0.96576  
 H 3.15134 -0.04462 2.16288  
 H 5.18520 -1.36791 2.66986  
 H 6.80650 -1.95026 0.84279  
 H 6.36329 -1.15132 -1.49383  
 H 4.36141 0.22029 -1.99025  
 H 1.76016 -3.73766 5.23418  
 H 1.62138 -1.98806 5.52099  
 H 0.15542 -2.96903 5.30212  
 H 3.88158 -4.26090 2.29714  
 H 2.88023 -4.87003 3.63588  
 H 2.50823 -5.33971 1.95959  
 H -2.64275 -5.18013 -2.22068  
 H -1.39510 -5.79266 -3.33114  
 H -1.18752 -5.97218 -1.57331  
 H -0.09693 -3.02535 -5.45660  
 H 1.33920 -3.87382 -4.83972  
 H -0.21991 -4.72284 -4.93792

TS(8-2)ctc

SCF = -2340.19156193  
 H(0 K)= -2339.303224  
 G(298 K)= -2339.397221  
 SCF(C6H6) = -2340.19862300  
 BP86(D3BJ) = -2340.54707675  
 Low Freq. = -413.8333cm-1, 14.6379cm-1

112

N -0.68342 -2.91833 -1.44477  
 C -0.07780 -1.66775 -1.56153  
 N 0.39912 -1.71053 -2.87072  
 C 0.11263 -2.92278 -3.51757  
 C -0.58017 -3.68728 -2.61375  
 Ru 0.00752 -0.14222 -0.16642  
 C 0.70115 -1.41591 1.42672  
 N 0.46896 -1.36272 2.79687  
 C 1.14655 -2.36394 3.50742  
 C 1.84787 -3.08854 2.57686  
 N 1.57302 -2.50092 1.33326  
 C -0.33351 -0.35200 3.47500  
 C 2.22309 -2.96187 0.11223  
 C 1.15086 -0.64140 -3.50944  
 C -1.36744 -3.40071 -0.25652  
 P -2.21838 0.32871 0.05462  
 C -3.18452 -0.04792 1.64206  
 C -2.53361 2.18869 -0.06513  
 C -1.54702 3.22153 -0.00074  
 C -1.94126 4.57155 -0.16862  
 C -3.27249 4.92814 -0.39309  
 C -4.25640 3.92713 -0.44009  
 C -3.87643 2.59063 -0.27490  
 O -0.18325 3.06808 0.11826  
 C 0.42326 2.43951 1.30357  
 C 1.85170 2.17325 1.14095  
 C 2.77340 2.59072 2.09789  
 C 2.35772 3.19775 3.30593  
 C 0.98059 3.37756 3.52215  
 C 0.02896 3.03359 2.55334  
 P 2.11711 1.02065 -0.28497  
 C 2.63110 2.20265 -1.66635  
 C -3.41391 -0.29697 -1.26732  
 C 3.72433 0.11914 0.06305  
 H -0.37924 0.83947 -1.43525

H -0.12620 1.16562 1.05688  
 H -1.02782 3.27427 2.71066  
 H 0.63378 3.84542 4.45211  
 H 3.09135 3.48704 4.06388  
 H 3.83667 2.37480 1.94015  
 H -4.64842 1.81607 -0.33054  
 H -5.30759 4.18024 -0.61237  
 H -3.54082 5.98238 -0.52205  
 H -1.15039 5.32554 -0.11546  
 C 2.76207 -4.26086 2.73909  
 C 1.04850 -2.51299 4.99233  
 C -1.17426 -5.05371 -2.74048  
 C 0.52369 -3.21069 -4.92636  
 H -0.70674 0.34243 2.71623  
 H -1.18808 -0.81166 3.99910  
 H 0.28489 0.20985 4.19439  
 H 3.30711 -3.06592 0.28045  
 H 1.81018 -3.93061 -0.22225  
 H 2.04916 -2.20878 -0.66524  
 H -1.23424 -2.63556 0.52067  
 H -2.44279 -3.55073 -0.45966  
 H -0.93281 -4.35645 0.08596  
 H 0.99625 0.26882 -2.91922  
 H 2.23083 -0.87285 -3.54619  
 H 0.78771 -0.48152 -4.53792  
 C -3.47266 -1.38839 1.98894  
 C -4.07764 -1.70958 3.21358  
 C -4.39181 -0.69470 4.13434  
 C -4.10764 0.64011 3.80773  
 C -3.51724 0.96009 2.57312  
 H -3.22878 -2.19223 1.28912  
 H -4.30322 -2.75574 3.44939  
 H -4.85778 -0.94334 5.09379  
 H -4.35156 1.44240 4.51291  
 H -3.31699 2.00751 2.33006  
 C -4.70065 -0.81109 -0.99865  
 C -5.52269 -1.26937 -2.04338  
 C -5.07797 -1.20991 -3.37274  
 C -3.80226 -0.69020 -3.65157  
 C -2.97589 -0.24516 -2.60938  
 H -5.07109 -0.85042 0.03031  
 H -6.51838 -1.66499 -1.81323  
 H -5.72111 -1.56229 -4.18642  
 H -3.44753 -0.63304 -4.68673  
 H -1.97608 0.14779 -2.82040  
 C 1.64071 2.71446 -2.52901  
 C 1.96308 3.67027 -3.50534  
 C 3.28141 4.13718 -3.62966  
 C 4.27173 3.65089 -2.76102  
 C 3.94960 2.69446 -1.78472  
 H 0.60642 2.37403 -2.40191  
 H 1.17783 4.05636 -4.16478  
 H 3.53403 4.88307 -4.39110  
 H 5.30053 4.02014 -2.83747  
 H 4.73167 2.33505 -1.10877  
 C 4.04083 -0.30992 1.37238  
 C 5.15263 -1.13421 1.61148  
 C 5.96401 -1.56297 0.54700  
 C 5.65010 -1.15978 -0.76220  
 C 4.54173 -0.33235 -1.00024  
 H 3.41119 0.00513 2.20961  
 H 5.38749 -1.43727 2.63808  
 H 6.83441 -2.20050 0.73566  
 H 6.27403 -1.48481 -1.60233  
 H 4.31611 -0.02134 -2.02607  
 H 1.64638 -3.37418 5.32989  
 H 1.42183 -1.61990 5.52635  
 H 0.00771 -2.67821 5.32636  
 H 3.79694 -4.02310 2.43065  
 H 2.79444 -4.57505 3.79422  
 H 2.43627 -5.13292 2.14269  
 H -2.27185 -5.04257 -2.60791  
 H -0.96714 -5.46819 -3.73953  
 H -0.76373 -5.76182 -1.99688  
 H 0.05061 -2.52187 -5.65087  
 H 1.61708 -3.12951 -5.06728  
 H 0.22925 -4.23422 -5.20663

2ctc (from IRC)

SCF = -2340.29453567  
H(0 K)= -2339.399980  
G(298 K)= -2339.496671  
SCF(C6H6) = -2340.30186232  
BP86(D3BJ) = -2340.64303532  
Low Freq. = 9.0046cm-1, 17.7904cm-1

112

N -1.03609 -0.04921 -2.98173  
C -0.44421 0.60391 -1.88811  
N -0.32598 1.91061 -2.38723  
C -0.81017 2.04193 -3.69780  
C -1.25501 0.80317 -4.07666  
Ru -0.07054 -0.07294 -0.00046  
C 0.27862 -2.16518 -0.48071  
N -0.15943 -3.29887 0.19670  
C 0.33372 -4.49312 -0.35006  
C 1.12736 -4.13136 -1.41012  
N 1.07886 -2.73137 -1.47216  
C -1.05536 -3.28871 1.34900  
C 1.81557 -1.97578 -2.47465  
C 0.15496 3.07377 -1.64944  
C -1.43366 -1.45005 -3.02488  
P -2.29818 0.18594 0.64478  
C -3.70785 -1.02126 0.29063  
C -2.13830 0.19178 2.47924  
C -0.83991 -0.18723 2.95465  
C -0.64367 -0.20897 4.37300  
C -1.67265 0.14651 5.24507  
C -2.94238 0.53712 4.76141  
C -3.16328 0.55658 3.37921  
O 0.14399 -0.52467 2.14075  
C 2.89850 -1.90043 1.72077  
C 3.17452 -0.52509 1.58999  
C 4.18520 0.04412 2.39385  
C 4.90945 -0.74812 3.30011  
C 4.63363 -2.11982 3.41580  
C 3.62586 -2.69236 2.62342  
P 2.23049 0.48931 0.31269  
C 2.46949 2.20363 1.05789  
C -3.17163 1.83250 0.31599  
C 3.51319 0.54057 -1.07645  
H -0.23776 1.46996 0.48962  
H 2.09118 -2.33898 1.13013  
H 3.39332 -3.75888 2.71737  
H 5.19581 -2.73696 4.12516  
H 5.68901 -0.28868 3.91781  
H 4.40861 1.11254 2.31469  
H -4.13814 0.86885 2.98512  
H -3.73745 0.82947 5.45457  
H -1.48754 0.12921 6.32601  
H 0.34269 -0.50419 4.74663  
C 1.93114 -4.96294 -2.35856  
C -0.00673 -5.84314 0.19654  
C -1.86545 0.34129 -5.36181  
C -0.80532 3.34208 -4.43706  
H -1.04950 -2.27690 1.76599  
H -2.07795 -3.58246 1.05890  
H -0.68214 -3.98538 2.11719  
H 2.90104 -2.00443 -2.28190  
H 1.62384 -2.38549 -3.48190  
H 1.47525 -0.93469 -2.42526  
H -1.45130 -1.82977 -1.99622  
H -2.43676 -1.54328 -3.47036  
H -0.72939 -2.05189 -3.62652  
H 0.50980 2.73039 -0.67009  
H 0.97467 3.57144 -2.19625  
H -0.66505 3.79513 -1.49385  
C -4.17601 -1.17791 -1.03404  
C -5.16818 -2.12072 -1.34638  
C -5.70573 -2.93805 -0.33783  
C -5.24912 -2.79460 0.98208  
C -4.26224 -1.84384 1.29450  
H -3.76945 -0.54019 -1.82634

H -5.52351 -2.21631 -2.37877  
H -6.47775 -3.67654 -0.57903  
H -5.66782 -3.42013 1.77848  
H -3.92014 -1.73236 2.32838  
C -4.48236 1.94613 -0.19065  
C -5.08229 3.20732 -0.36065  
C -4.39005 4.37521 -0.01175  
C -3.09106 4.27302 0.51586  
C -2.48921 3.01634 0.67429  
H -5.05380 1.04964 -0.44577  
H -6.10112 3.26908 -0.75928  
H -4.86025 5.35643 -0.13870  
H -2.54374 5.17542 0.81074  
H -1.47719 2.93977 1.08628  
C 1.69174 2.52099 2.19510  
C 1.82310 3.77082 2.81714  
C 2.72043 4.72691 2.30756  
C 3.49610 4.41780 1.18092  
C 3.37918 3.15820 0.56325  
H 0.99058 1.77610 2.58524  
H 1.21930 3.99867 3.70230  
H 2.81535 5.70580 2.79004  
H 4.20166 5.15348 0.77884  
H 4.00060 2.92455 -0.30663  
C 4.78792 -0.05716 -0.97358  
C 5.68703 -0.02514 -2.05404  
C 5.33424 0.61163 -3.25381  
C 4.06942 1.21271 -3.36849  
C 3.16747 1.17001 -2.29404  
H 5.08357 -0.55012 -0.04320  
H 6.67031 -0.49758 -1.95118  
H 6.03709 0.63839 -4.09339  
H 3.77949 1.71020 -4.30076  
H 2.17358 1.61130 -2.40772  
H 0.46589 -6.63025 -0.41180  
H 0.34277 -5.97467 1.23728  
H -1.09608 -6.02952 0.19401  
H 3.00593 -4.70628 -2.32855  
H 1.83886 -6.02981 -2.10150  
H 1.59869 -4.84644 -3.40707  
H -2.90552 -0.01259 -5.23284  
H -1.89076 1.16940 -6.08722  
H -1.29596 -0.48624 -5.82358  
H -1.41197 4.11195 -3.92608  
H 0.21337 3.75599 -4.55326  
H -1.22452 3.20759 -5.44642

2ttt

SCF = -2340.31236872  
H(0 K)= -2339.416549  
G(298 K)= -2339.510844  
SCF(C6H6) = -2340.31828521  
BP86(D3BJ) = -2340.66996203  
Low Freq. = 12.4684cm-1, 17.6552cm-1

112

Ru -0.04095 0.02620 -0.03585  
H 0.09552 0.04134 -1.62385  
P -2.38431 -0.19717 0.08934  
P 2.30426 0.18646 -0.02659  
O -0.38820 0.14234 2.23198  
N 0.06283 3.12842 0.69010  
N -0.71440 2.84025 -1.30402  
N 0.27146 -2.87140 -1.30815  
N 0.14282 -3.06132 0.83764  
C -0.25069 2.11711 -0.20787  
C -0.18266 4.40831 0.17449  
C -0.68370 4.22430 -1.08963  
C 0.67836 2.92418 1.99877  
H 0.49523 1.88216 2.29950  
H 0.21376 3.59916 2.73596  
H 1.76151 3.13471 1.95218  
C 0.09384 5.66258 0.94025  
H -0.15357 6.54354 0.32732  
H 1.15812 5.74456 1.22608  
H -0.50146 5.72806 1.86980

C -1.16141 5.21177 -2.10568  
H -2.22886 5.06225 -2.35155  
H -0.59496 5.14802 -3.05296  
H -1.04777 6.23776 -1.72195  
C -1.17483 2.27994 -2.56823  
H -0.54180 2.64017 -3.39967  
H -2.22211 2.56436 -2.76163  
H -1.08899 1.18802 -2.49272  
C 0.14538 -2.09245 -0.15830  
C 0.34109 -4.24220 -1.02857  
C 0.25541 -4.36432 0.33466  
C 0.39982 -2.38775 -2.67715  
H 1.41126 -2.59573 -3.06662  
H 0.23344 -1.30174 -2.65778  
H -0.34777 -2.87715 -3.32471  
C 0.47540 -5.28281 -2.09368  
H -0.39235 -5.29051 -2.77885  
H 0.54505 -6.28389 -1.63980  
H 1.38061 -5.12995 -2.70896  
C 0.24791 -5.57667 1.20991  
H 1.07391 -5.56914 1.94459  
H 0.35516 -6.48716 0.59969  
H -0.69397 -5.66887 1.78116  
C 0.04112 -2.80347 2.27033  
H -0.88096 -3.25414 2.67637  
H 0.01314 -1.71466 2.42165  
H 0.90955 -3.23632 2.79621  
C -2.77064 0.03091 1.87437  
C -1.61675 0.18509 2.71076  
C -1.84787 0.38828 4.10990  
H -0.97435 0.50348 4.76151  
C -3.14174 0.44739 4.62717  
H -3.28234 0.60783 5.70306  
C -4.27077 0.31398 3.78776  
H -5.28300 0.37574 4.19960  
C -4.07292 0.11285 2.41664  
H -4.93882 0.02969 1.74865  
C -3.15341 -1.83632 -0.40455  
C -3.86473 -2.64728 0.50237  
H -3.99593 -2.31277 1.53617  
C -4.40491 -3.87753 0.08934  
H -4.95590 -4.49432 0.80810  
C -4.24860 -4.31282 -1.23573  
H -4.67714 -5.26820 -1.55727  
C -3.53402 -3.51639 -2.14638  
H -3.40267 -3.84856 -3.18252  
C -2.98109 -2.29522 -1.72951  
H -2.40251 -1.69043 -2.43649  
C -3.59897 1.01677 -0.69668  
C -4.42746 0.70433 -1.79385  
H -4.43464 -0.31032 -2.20322  
C -5.26745 1.67849 -2.36143  
H -5.90857 1.41153 -3.20897  
C -5.29448 2.98110 -1.84000  
H -5.95300 3.73851 -2.27889  
C -4.48239 3.30022 -0.73720  
H -4.50709 4.30824 -0.30858  
C -3.64394 2.32790 -0.17156  
H -3.02343 2.58239 0.69356  
C 3.22930 -0.99830 -1.17901  
C 3.33754 -2.35316 -0.79279  
H 2.93016 -2.67731 0.17014  
C 3.96694 -3.29184 -1.62435  
H 4.04386 -4.33523 -1.29927  
C 4.50097 -2.89550 -2.86314  
H 4.99607 -3.62670 -3.51127  
C 4.40656 -1.55114 -3.25391  
H 4.83114 -1.22449 -4.20973  
C 3.77826 -0.61086 -2.41801  
H 3.73227 0.43559 -2.73332  
C 3.01718 1.83881 -0.58902  
C 2.52227 2.39533 -1.79061  
H 1.74622 1.85666 -2.34409  
C 3.00053 3.62666 -2.26437  
H 2.61309 4.03458 -3.20458  
C 3.96684 4.33806 -1.53320  
H 4.33626 5.30221 -1.89885

C 4.45062 3.80548 -0.32890  
H 5.20103 4.35294 0.25229  
C 3.98422 2.56351 0.13762  
H 4.38038 2.15792 1.07322  
C 3.30987 -0.14200 1.53488  
C 2.65735 -0.16093 2.78504  
H 1.57210 -0.00894 2.83080  
C 3.39158 -0.39599 3.96215  
H 2.87249 -0.41269 4.92710  
C 4.77634 -0.61422 3.90659  
H 5.34393 -0.79871 4.82538  
C 5.43267 -0.60161 2.66357  
H 6.51303 -0.77611 2.60927  
C 4.70493 -0.37053 1.48642  
H 5.22365 -0.37204 0.52202

2. Ligand Dissociation from  
Ru(IME4)2 (DPEphos)H2

(i) IME4 Dissociation

8ccc-IME4 trans P

SCF = -1956.77271846  
H(0 K) = -1956.060524  
G(298 K) = -1956.143413  
SCF(C6H6) = -1956.77953493  
BP86 (D3BJ) = -1957.05050685  
Low Freq. = 17.5117cm-1, 20.5285cm-1

91  
N 0.18589 2.82796 0.69691  
C -0.19238 1.98485 -0.34427  
N -0.72158 2.88863 -1.25955  
C -0.66744 4.21504 -0.80863  
C -0.08668 4.17866 0.43504  
Ru 0.03638 -0.10930 -0.56782  
O 0.15516 -0.87874 1.66950  
C -1.05173 -0.89541 2.39221  
C -2.25016 -0.78635 1.65168  
C -3.45577 -0.72344 2.38205  
C -3.47069 -0.73979 3.78492  
C -2.26046 -0.80456 4.49255  
C -1.04384 -0.87572 3.79714  
P -2.15897 -0.65351 -0.23874  
C -3.56286 0.54178 -0.59836  
C -1.30913 2.52713 -2.54469  
C 0.79213 2.37853 1.94172  
P 2.28416 -0.38954 -0.33324  
C 3.35174 -1.21481 -1.63891  
C 2.35141 -1.62686 1.09029  
C 1.20270 -1.79076 1.90491  
C 1.10978 -2.83655 2.83484  
C 2.19891 -3.70806 3.00320  
C 3.36627 -3.54219 2.24627  
C 3.42699 -2.51402 1.29177  
C 3.45304 0.97365 0.23405  
C -2.93439 -2.29128 -0.76543  
H 0.19280 -2.99092 3.40672  
H 2.11712 -4.52685 3.72547  
H 4.21355 -4.22309 2.37456  
H 4.31242 -2.41826 0.65476  
H 0.03715 0.12314 -2.12669  
H 0.25419 -1.67660 -1.06216  
H -4.39957 -0.62740 1.83669  
H -4.42269 -0.68062 4.32217  
H -2.25481 -0.78627 5.58716  
H -0.09306 -0.90109 4.33619  
H -2.38915 2.75273 -2.55620  
H -0.81222 3.07612 -3.36342  
H -1.15092 1.44756 -2.67857  
C -1.18056 5.36654 -1.61303  
C 0.24850 5.27647 1.39357  
H 1.80143 2.80552 2.06646  
H 0.86828 1.28520 1.89884  
H 0.16734 2.66597 2.80597  
H -0.05155 6.25132 0.97779

|   |          |          |          |
|---|----------|----------|----------|
| H | -0.26725 | 5.15868  | 2.36489  |
| H | 1.33266  | 5.32514  | 1.60522  |
| H | -0.65127 | 5.47217  | -2.57820 |
| H | -2.25684 | 5.26258  | -1.84259 |
| H | -1.04791 | 6.30919  | -1.05890 |
| C | -3.70965 | 1.71751  | 0.17085  |
| C | -4.63077 | 2.70872  | -0.20164 |
| C | -5.41252 | 2.55078  | -1.35926 |
| C | -5.26576 | 1.39192  | -2.13945 |
| C | -4.34818 | 0.39734  | -1.76373 |
| H | -3.09528 | 1.85817  | 1.06616  |
| H | -4.73724 | 3.60816  | 0.41501  |
| H | -6.13179 | 3.32417  | -1.64937 |
| H | -5.86945 | 1.25762  | -3.04385 |
| H | -4.24404 | -0.50116 | -2.38090 |
| C | -2.11291 | -3.25429 | -1.38125 |
| C | -2.63265 | -4.50658 | -1.74939 |
| C | -3.98039 | -4.81162 | -1.50397 |
| C | -4.80942 | -3.85616 | -0.89190 |
| C | -4.29127 | -2.60401 | -0.52742 |
| H | -1.05999 | -2.99830 | -1.55441 |
| H | -1.98043 | -5.24410 | -2.23006 |
| H | -4.38648 | -5.78806 | -1.78992 |
| H | -5.86366 | -4.08453 | -0.69984 |
| H | -4.95532 | -1.86335 | -0.07017 |
| C | 4.75843  | -1.09849 | -1.65902 |
| C | 5.51011  | -1.73448 | -2.66109 |
| C | 4.86524  | -2.48652 | -3.65613 |
| C | 3.46470  | -2.59566 | -3.64859 |
| C | 2.71064  | -1.96106 | -2.64918 |
| H | 5.26915  | -0.49974 | -0.89739 |
| H | 6.60138  | -1.63664 | -2.66544 |
| H | 5.45198  | -2.97818 | -4.43977 |
| H | 2.95463  | -3.17011 | -4.42975 |
| H | 1.61699  | -2.02201 | -2.63607 |
| C | 4.23570  | 0.91676  | 1.40599  |
| C | 5.02689  | 2.01385  | 1.79152  |
| C | 5.04999  | 3.17854  | 1.00799  |
| C | 4.27492  | 3.24370  | -0.16410 |
| C | 3.47778  | 2.15352  | -0.54287 |
| H | 4.22548  | 0.01229  | 2.02339  |
| H | 5.62867  | 1.95456  | 2.70543  |
| H | 5.66762  | 4.03197  | 1.30807  |
| H | 4.28698  | 4.14922  | -0.78085 |
| H | 2.85354  | 2.21490  | -1.44169 |

8cct-IMe4 trans IMe4

SCF = -1956.77034029  
H(0 K) = -1956.059266  
G(298 K) = -1956.142055  
SCF(C6H6) = -1956.77715723  
BP86(D3BJ) = -1957.04222900  
Low Freq. = 14.0281cm-1, 15.5829cm-1

91

|    |          |          |          |
|----|----------|----------|----------|
| N  | 0.50070  | 2.97499  | 0.96295  |
| C  | -0.00002 | 2.10039  | -0.00012 |
| N  | -0.50080 | 2.97500  | -0.96316 |
| C  | -0.32123 | 4.31954  | -0.60645 |
| C  | 0.32094  | 4.31955  | 0.60636  |
| Ru | -0.00001 | 0.11579  | -0.00009 |
| P  | 2.25378  | -0.31020 | -0.03247 |
| C  | 3.39565  | 0.61637  | -1.18460 |
| C  | -1.14872 | 2.55554  | -2.19715 |
| C  | -0.77822 | 5.45909  | -1.46071 |
| C  | 0.77779  | 5.45913  | 1.46064  |
| C  | 1.14857  | 2.55547  | 2.19696  |
| C  | 2.26166  | -2.06201 | -0.72994 |
| C  | 1.07134  | -2.81497 | -0.62703 |
| C  | 0.94868  | -4.08653 | -1.20704 |
| C  | 2.05840  | -4.64561 | -1.86115 |
| C  | 3.26901  | -3.94059 | -1.93790 |
| C  | 3.36047  | -2.65637 | -1.37764 |
| O  | -0.00009 | -2.16237 | -0.00009 |
| C  | -1.07122 | -2.81480 | 0.62756  |
| C  | -2.26153 | -2.06183 | 0.73056  |

|   |          |          |          |
|---|----------|----------|----------|
| C | -3.36011 | -2.65593 | 1.37888  |
| C | -3.26843 | -3.93993 | 1.93962  |
| C | -2.05785 | -4.64497 | 1.86271  |
| C | -0.94835 | -4.08613 | 1.20799  |
| P | -2.25382 | -0.31030 | 0.03240  |
| C | -3.39585 | 0.61660  | 1.18410  |
| C | -3.32694 | -0.59042 | -1.49798 |
| C | 3.32707  | -0.58963 | 1.49792  |
| H | -0.95704 | 3.29748  | -2.98792 |
| H | -2.24016 | 2.44356  | -2.06517 |
| H | -0.72395 | 1.57740  | -2.47113 |
| H | 2.23989  | 2.44253  | 2.06477  |
| H | 0.72318  | 1.57773  | 2.47143  |
| H | 0.95770  | 3.29790  | 2.98745  |
| H | -0.18717 | 0.08634  | 1.68660  |
| H | -4.29255 | -2.08947 | 1.46874  |
| H | -4.13226 | -4.37814 | 2.44935  |
| H | -1.96316 | -5.63409 | 2.32235  |
| H | 0.00238  | -4.62265 | 1.16750  |
| H | -0.00207 | -4.62302 | -1.16666 |
| H | 1.96389  | -5.63492 | -2.32043 |
| H | 4.13302  | -4.37899 | -2.44716 |
| H | 4.29294  | -2.08993 | -1.46739 |
| H | 0.18710  | 0.08626  | -1.68677 |
| H | 1.86480  | 5.42317  | 1.65870  |
| H | 0.56575  | 6.41639  | 0.95906  |
| H | 0.26705  | 5.48274  | 2.44165  |
| H | -0.26754 | 5.48272  | -2.44174 |
| H | -1.86524 | 5.42300  | -1.65872 |
| H | -0.56627 | 6.41638  | -0.95915 |
| C | -4.72734 | -0.76729 | -1.46073 |
| C | -5.43851 | -1.05822 | -2.63581 |
| C | -4.75997 | -1.18404 | -3.85989 |
| C | -3.36615 | -1.01992 | -3.90289 |
| C | -2.65431 | -0.72381 | -2.72879 |
| H | -5.26933 | -0.67173 | -0.51410 |
| H | -6.52560 | -1.18904 | -2.59429 |
| H | -5.31719 | -1.41123 | -4.77528 |
| H | -2.82977 | -1.12115 | -4.85306 |
| H | -1.56252 | -0.59506 | -2.73863 |
| C | -4.28245 | 1.60035  | 0.69734  |
| C | -5.02362 | 2.39785  | 1.58577  |
| C | -4.89020 | 2.22186  | 2.97156  |
| C | -4.00117 | 1.25145  | 3.46531  |
| C | -3.25174 | 0.46265  | 2.58037  |
| H | -4.40121 | 1.74278  | -0.38190 |
| H | -5.70877 | 3.15572  | 1.19023  |
| H | -5.47157 | 2.83998  | 3.66401  |
| H | -3.88446 | 1.11251  | 4.54574  |
| H | -2.53639 | -0.26939 | 2.96865  |
| C | 4.72756  | -0.76579 | 1.46075  |
| C | 5.43882  | -1.05626 | 2.63589  |
| C | 4.76030  | -1.18232 | 3.85994  |
| C | 3.36639  | -1.01887 | 3.90287  |
| C | 2.65446  | -0.72321 | 2.72872  |
| H | 5.26954  | -0.67002 | 0.51413  |
| H | 6.52598  | -1.18652 | 2.59442  |
| H | 5.31759  | -1.40915 | 4.77538  |
| H | 2.83002  | -1.12028 | 4.85304  |
| H | 1.56261  | -0.59490 | 2.73853  |
| C | 3.25194  | 0.46148  | -2.58081 |
| C | 4.00123  | 1.25005  | -3.46607 |
| C | 4.88971  | 2.22117  | -2.97273 |
| C | 5.02273  | 2.39810  | -1.58702 |
| C | 4.28170  | 1.60084  | -0.69826 |
| H | 2.53703  | -0.27114 | -2.96880 |
| H | 3.88483  | 1.11038  | -4.54644 |
| H | 5.47098  | 2.83911  | -3.66543 |
| H | 5.70744  | 3.15653  | -1.19180 |
| H | 4.40013  | 1.74401  | 0.38092  |

8ccc-IMe trans IMe4

SCF = -1956.77282011  
H(0 K) = -1956.061021  
G(298 K) = -1956.145537  
SCF(C6H6) = -1956.77980732

BP86(D3BJ) = -1957.05201336  
Low Freq. = 13.3468cm-1, 23.4979cm-1

91  
C -3.96616 -1.44179 -1.68462  
C -2.61216 -1.25266 -1.34903  
C -1.64640 -1.76533 -2.23688  
C -1.98921 -2.37847 -3.44786  
C -3.34887 -2.54459 -3.76353  
C -4.33545 -2.09118 -2.87543  
P -1.98851 -0.14496 0.05661  
C -3.43719 1.04062 0.24085  
O -0.28073 -1.55384 -1.91735  
C 0.47829 -2.65262 -1.44867  
C 1.59496 -2.36058 -0.63409  
C 2.37315 -3.44310 -0.17027  
C 2.06648 -4.76901 -0.50709  
C 0.94692 -5.02970 -1.31047  
C 0.14669 -3.97757 -1.78078  
P 1.88839 -0.58893 -0.08836  
C 2.42207 -0.90717 1.69737  
Ru 0.03798 0.54029 -0.95522  
C 0.35421 2.38741 -0.33072  
N 0.48329 2.88460 0.96676  
C 0.74745 4.26145 0.98793  
C 0.78315 4.67209 -0.32168  
N 0.53441 3.53311 -1.10576  
C 0.37622 2.07472 2.17046  
C 0.52924 3.54520 -2.56548  
C -2.26609 -1.25743 1.55296  
C 3.54297 -0.14263 -0.85759  
H 1.47709 3.14711 -2.96645  
H 0.38072 4.57718 -2.91710  
H -0.28096 2.89488 -2.92410  
C 1.02104 6.03288 -0.89602  
C 0.92322 5.02837 2.25967  
H -0.34432 2.52501 2.87485  
H 1.35320 1.96819 2.67286  
H 0.02798 1.07822 1.86277  
H 3.21803 -3.23232 0.49366  
H 2.68628 -5.58978 -0.13279  
H 0.68026 -6.05875 -1.57320  
H -0.73426 -4.19251 -2.38802  
H -0.98579 1.16149 -2.07053  
H 1.03542 0.90463 -2.17651  
H -1.20183 -2.69906 -4.13592  
H -3.62977 -3.01704 -4.71025  
H -5.39516 -2.21535 -3.12100  
H -4.74029 -1.03960 -1.02321  
H 0.00855 5.02328 2.88182  
H 1.74129 4.62103 2.88188  
H 1.16560 6.08022 2.04160  
H 1.88627 6.05370 -1.58377  
H 0.14707 6.41356 -1.45732  
H 1.22619 6.75152 -0.08704  
C 3.91086 1.22091 -0.82566  
C 5.12884 1.64796 -1.37549  
C 5.98822 0.72161 -1.99107  
C 5.62247 -0.63182 -2.04539  
C 4.41184 -1.06346 -1.47524  
H 3.22366 1.95037 -0.38292  
H 5.40109 2.70858 -1.33626  
H 6.93342 1.05541 -2.43249  
H 6.28061 -1.35978 -2.53261  
H 4.14072 -2.12235 -1.52702  
C 3.69680 -0.57781 2.20319  
C 3.99362 -0.76111 3.56591  
C 3.02603 -1.28266 4.43798  
C 1.75340 -1.61685 3.94134  
C 1.45166 -1.42236 2.58615  
H 4.46427 -0.18009 1.53190  
H 4.98956 -0.50068 3.94177  
H 3.26006 -1.42774 5.49824  
H 0.98702 -2.02454 4.60930  
H 0.45179 -1.67175 2.21346  
C -2.28468 -0.68397 2.84634  
C -2.34279 -1.49107 3.99237

C -2.36863 -2.89168 3.87073  
C -2.34377 -3.47374 2.59335  
C -2.29643 -2.66494 1.44543  
H -2.26722 0.40615 2.95631  
H -2.36945 -1.02467 4.98350  
H -2.41228 -3.52273 4.76467  
H -2.36845 -4.56376 2.48589  
H -2.28639 -3.13460 0.45641  
C -4.59931 0.74864 0.98843  
C -5.64623 1.68175 1.07220  
C -5.54610 2.91701 0.41163  
C -4.39295 3.21567 -0.33266  
C -3.34441 2.28584 -0.41562  
H -4.68429 -0.20719 1.51557  
H -6.54193 1.44095 1.65553  
H -6.36257 3.64420 0.47925  
H -4.30675 4.17842 -0.84859  
H -2.43944 2.50168 -0.99402

8ccc-Ime4 trans H

SCF = -1956.77434997  
H(0 K) = -1956.063504  
G(298 K) = -1956.148971  
SCF(C6H6) = -1956.78160744  
BP86(D3BJ) = -1957.06279461  
Low Freq. = 12.9641cm-1, 21.5357cm-1

91  
N -3.09853 -2.15559 -1.25073  
C -2.11292 -1.91854 -0.31525  
N -2.57166 -2.60627 0.79661  
C -3.78673 -3.26620 0.55651  
C -4.12555 -2.97080 -0.74304  
Ru -0.28988 -1.02283 -0.33237  
P 2.02316 -0.75058 -0.18682  
C 2.72195 -1.79552 1.21989  
C -1.78018 -2.67867 2.01573  
C -3.09885 -1.58737 -2.59196  
C 2.79483 0.92366 0.18125  
C 2.21625 1.69810 1.21386  
C 2.60893 3.02263 1.45821  
C 3.61127 3.59779 0.66241  
C 4.21309 2.85107 -0.36121  
C 3.80368 1.52811 -0.59556  
O 1.27563 1.04839 2.01361  
C 0.19768 1.77689 2.51946  
C -0.95578 1.97806 1.72131  
C -2.02950 2.67465 2.31977  
C -1.96815 3.12810 3.64826  
C -0.82412 2.88438 4.42290  
C 0.26396 2.20411 3.85456  
P -1.03481 1.18726 -0.00627  
C -0.27569 2.57121 -1.03726  
C -2.85955 1.47178 -0.40259  
C 3.10293 -1.35122 -1.60207  
H -2.13621 -1.07281 -2.72164  
H -3.92258 -0.86257 -2.71060  
H -3.19640 -2.38198 -3.35129  
C -5.31799 -3.36185 -1.55566  
C -4.48280 -4.09492 1.58837  
H -1.15579 -1.76767 2.07701  
H -1.11832 -3.56169 2.02517  
H -2.43498 -2.70392 2.90186  
H 4.26528 0.95637 -1.40607  
H 4.99592 3.29680 -0.98332  
H 3.91985 4.63181 0.84901  
H 2.13202 3.58996 2.26269  
H 1.17115 1.99235 4.42884  
H -0.77375 3.22143 5.46344  
H -2.82020 3.66627 4.07691  
H -2.93767 2.85262 1.73596  
H 0.18109 -2.52735 -0.80356  
H -0.33531 -0.80171 -1.87644  
H -4.76401 -3.50579 2.48148  
H -5.40953 -4.52019 1.17237  
H -3.85916 -4.93902 1.93625

H -5.99423 -3.99681 -0.96199  
H -5.89654 -2.48146 -1.89085  
H -5.03729 -3.93260 -2.46003  
C -3.82948 0.75520 0.33581  
C -5.19300 0.84938 0.02048  
C -5.61564 1.64848 -1.05677  
C -4.66265 2.35766 -1.50350  
C -3.29733 2.27515 -1.47595  
H -3.51066 0.11457 1.16464  
H -5.92639 0.29250 0.61413  
H -6.67954 1.71926 -1.30778  
H -4.97898 2.98678 -2.64303  
H -2.56916 2.84234 -2.06302  
C -0.39445 3.93445 -0.69344  
C 0.12123 4.92971 -1.53843  
C 0.75858 4.57576 -2.73957  
C 0.88399 3.22168 -3.08785  
C 0.37272 2.22557 -2.23931  
H -0.89303 4.22018 0.23885  
H 0.02460 5.98444 -1.25768  
H 1.16041 5.35348 -3.39818  
H 1.38722 2.93707 -4.01841  
H 0.47595 1.16408 -2.49106  
C 4.46995 -1.66140 -1.43644  
C 5.23471 -2.11170 -2.52429  
C 4.64196 -2.26018 -3.78981  
C 3.28038 -1.96345 -3.96058  
C 2.51446 -1.51537 -2.87151  
H 4.93561 -1.55985 -0.45007  
H 6.29406 -2.35226 -2.38189  
H 5.23866 -2.61555 -4.63700  
H 2.80894 -2.09116 -4.94135  
H 1.44315 -1.31363 -2.98057  
C 2.28841 -3.13643 1.32560  
C 2.77422 -3.96550 2.34883  
C 3.69302 -3.46686 3.28765  
C 4.12853 -2.13598 3.19084  
C 3.64921 -1.30641 2.16261  
H 1.56495 -3.51583 0.59474  
H 2.43395 -5.00531 2.41226  
H 4.06919 -4.11275 4.08850  
H 4.84766 -1.73896 3.91608  
H 4.00240 -0.27258 2.09251

(ii) Ru-P dissociation

8ccc-P trans IMe4

SCF = -2340.22942530  
H(0 K) = -2339.340766  
G(298 K) = -2339.444599  
SCF(C6H6) = -2340.23732936ctc  
BP86(D3BJ) = -2340.55676224  
Low Freq. = 6.9295cm<sup>-1</sup>, 13.1773cm<sup>-1</sup>

112

C 6.30604 1.02858 0.67166  
C 4.94329 1.12976 1.02204  
C 4.53333 2.21061 1.83578  
C 5.45368 3.17729 2.26680  
C 6.80808 3.06729 1.90889  
C 7.23076 1.98946 1.11524  
P 3.61928 -0.11869 0.56278  
C 2.92570 0.67345 -0.99152  
C 1.70162 0.18671 -1.50788  
C 1.10438 0.74481 -2.65170  
C 1.73684 1.81185 -3.30458  
C 2.95017 2.32295 -2.81044  
C 3.53107 1.76054 -1.66277  
O 1.03581 -0.82508 -0.81070  
C 0.67810 -1.98075 -1.51902  
C -0.57345 -2.57999 -1.25173  
C -0.85093 -3.80149 -1.90470  
C 0.05676 -4.39011 -2.79788  
C 1.28390 -3.76064 -3.05553  
C 1.59906 -2.55726 -2.41135  
P -1.85514 -1.71566 -0.16128

C -1.54750 -2.57837 1.49079  
C -0.54531 -3.54683 1.70650  
C -0.32743 -4.08130 2.98881  
C -1.11685 -3.66538 4.07250  
C -2.12618 -2.70729 3.86749  
C -2.33183 -2.16279 2.59085  
Ru -1.92701 0.58506 -0.37596  
C -1.96857 1.13132 1.64401  
N -1.03551 0.88412 2.65130  
C -1.44343 1.35659 3.90666  
C -2.67331 1.93839 3.71625  
N -2.96862 1.79950 2.35099  
C 0.23938 0.21898 2.42419  
C -0.62144 1.18294 5.14374  
C -3.59760 2.60667 4.68360  
C -4.19954 2.29277 1.75025  
C -2.02387 2.48404 -1.12215  
N -2.91590 3.03783 -2.03490  
C -2.58077 4.35419 -2.38358  
C -1.43986 4.66554 -1.68354  
N -1.12823 3.53085 -0.92002  
C -4.05059 2.31830 -2.59592  
C 0.05359 3.41659 -0.07780  
C -0.61824 5.91485 -1.65787  
C -3.38879 5.16916 -3.34235  
C -3.41060 -2.63031 -0.71873  
C -4.07569 -2.15351 -1.86971  
C -5.24191 -2.78084 -2.33242  
C -5.77176 -3.88725 -1.64598  
C -5.11976 -4.36681 -0.49980  
C -3.94313 -3.74704 -0.04200  
H -3.48187 0.48450 -0.39164  
H -1.99813 0.14081 -2.00052  
H 0.12680 0.36491 -2.96850  
H 1.26988 2.25398 -4.19088  
H 3.44613 3.15765 -3.31719  
H 4.47357 2.16213 -1.27713  
H -1.81331 -4.28818 -1.72005  
H -0.19790 -5.33359 -3.29164  
H 2.00530 -4.20727 -3.74788  
H 2.56354 -2.06924 -2.57746  
H 1.08659 0.89693 2.63188  
H 0.33631 -0.67741 3.05876  
H 0.27977 -0.09313 1.37078  
H -4.15270 2.03759 0.68213  
H -5.08295 1.80924 2.20411  
H -4.28899 3.38665 1.87496  
H -4.05698 2.40899 -3.69553  
H -3.92415 1.26362 -2.30932  
H -5.00804 2.70380 -2.20048  
H 0.19056 4.33429 0.51867  
H -0.11425 2.56447 0.59899  
H 0.96246 3.23460 -0.67805  
H -3.66089 -1.27912 -2.38313  
H -5.74359 -2.40022 -3.22948  
H -6.68755 -4.37158 -2.00252  
H -5.52300 -5.22968 0.04225  
H -3.44024 -4.13646 0.84860  
H 0.06931 -3.88782 0.86715  
H 0.45870 -4.83028 3.13743  
H -0.94960 -4.08560 5.07034  
H -2.75123 -2.37906 4.70568  
H -3.10091 -1.39739 2.43817  
H 3.48183 2.29056 2.13701  
H 5.11584 4.01053 2.89256  
H 7.53082 3.81442 2.25358  
H 8.28607 1.89381 0.83688  
H 6.64663 0.19261 0.05262  
H -0.44839 0.11578 5.37519  
H 0.37187 1.66159 5.05803  
H -1.13140 1.63320 6.01018  
H -4.58003 2.10184 4.74089  
H -3.16304 2.59780 5.69574  
H -3.79223 3.66222 4.41631  
H -2.95441 6.17559 -3.44952  
H -3.42562 4.71576 -4.35045  
H -4.43469 5.29342 -3.00524

H 0.43071 5.72791 -1.95311  
H -1.03151 6.65780 -2.35823  
H -0.59551 6.38419 -0.65624  
C 4.64767 -1.50490 -0.16654  
C 5.17463 -1.50239 -1.47650  
C 5.93851 -2.58674 -1.93899  
C 6.18691 -3.68525 -1.09907  
C 5.66600 -3.69811 0.20486  
C 4.89673 -2.61755 0.66528  
H 4.98257 -0.64829 -2.13511  
H 6.34084 -2.57279 -2.95794  
H 6.77998 -4.53124 -1.46231  
H 5.85006 -4.55483 0.86195  
H 4.47761 -2.63727 1.67790

5cct-P

SCF = -2340.21980500  
H(0 K) = -2339.330387  
G(298 K) = -2339.429324  
SCF(C6H6) = -2340.22773529  
BP86(D3BJ) = -2340.56063825

112

C 4.16800 -3.07738 -0.23451  
C 3.44960 -2.17626 -1.05154  
C 2.92430 -2.63795 -2.27646  
C 3.11891 -3.96900 -2.68242  
C 3.83819 -4.85491 -1.86528  
C 4.36227 -4.40738 -0.64009  
P 3.14307 -0.37611 -0.62712  
C 2.93078 -0.50896 1.23891  
C 1.68125 -0.91682 1.75765  
C 1.44466 -1.01949 3.13798  
C 2.46927 -0.70926 4.04133  
C 3.71909 -0.28526 3.55844  
C 3.93863 -0.18373 2.17523  
O 0.63689 -1.21992 0.86347  
C 0.06772 -2.50101 1.00239  
C -1.30361 -2.66240 0.72766  
C -1.83922 -3.96827 0.79089  
C -1.04996 -5.06971 1.14541  
C 0.31481 -4.87870 1.41950  
C 0.87900 -3.59974 1.34273  
P -2.31311 -1.17765 0.19052  
C -3.72690 -1.12498 1.42535  
C -3.81206 -1.94123 2.57068  
C -4.85907 -1.77428 3.49388  
C -5.84336 -0.79746 3.28091  
C -5.76836 0.02266 2.14177  
C -4.71451 -0.13264 1.22908  
Ru -0.88078 0.61210 0.08230  
C -2.21697 1.92495 -0.51674  
N -2.91047 2.00761 -1.73375  
C -3.77151 3.11353 -1.78745  
C -3.63504 3.77608 -0.59399  
N -2.70249 3.05164 0.16321  
C -2.74638 1.08906 -2.85087  
C -4.63147 3.41223 -2.97439  
C -4.29965 5.01967 -0.09443  
C -2.31919 3.43633 1.51367  
C 0.52071 2.14396 0.14477  
N 1.14359 2.75346 1.23392  
C 1.96604 3.82268 0.85765  
C 1.87574 3.91721 -0.51174  
N 1.00969 2.89740 -0.92152  
C 0.96557 2.36454 2.62708  
C 0.68447 2.65983 -2.32258  
C 2.52607 4.86830 -1.46644  
C 2.74568 4.63524 1.84300  
C -3.16501 -1.99847 -1.28927  
C -2.35658 -2.25445 -2.41853  
C -2.89383 -2.86574 -3.55979  
C -4.25533 -3.21827 -3.59801  
C -5.06820 -2.96229 -2.48382  
C -4.52567 -2.36205 -1.33206  
H -1.24263 0.86370 1.71990

H -0.37810 0.20263 -1.49024  
H 0.45473 -1.33178 3.48254  
H 2.28619 -0.78809 5.11793  
H 4.52735 -0.04118 4.25590  
H 4.91544 0.14327 1.80574  
H -2.89705 -4.11238 0.54671  
H -1.49155 -6.07024 1.19400  
H 0.95285 -5.73034 1.67745  
H 1.94605 -3.45214 1.52368  
H -2.62417 1.65471 -3.79085  
H -1.84042 0.49700 -2.63508  
H -3.61052 0.41053 -2.94927  
H -1.91862 2.52688 1.99375  
H -1.54105 4.22125 1.50484  
H -3.19957 3.80932 2.06213  
H 1.88679 1.91490 3.03300  
H 0.69489 3.24569 3.23516  
H 0.14509 1.62542 2.64167  
H 0.24492 1.64761 -2.36565  
H -0.04417 3.40249 -2.69323  
H 1.60005 2.71229 -2.93446  
H -1.30387 -1.94528 -2.39260  
H -2.25174 -3.06125 -4.42618  
H -4.67820 -3.68858 -4.49252  
H -6.12954 -3.23482 -2.50339  
H -5.16830 -2.17833 -0.46518  
H -3.05380 -2.70965 2.75018  
H -4.90466 -2.41562 4.38131  
H -6.66133 -0.67176 3.99848  
H -6.52827 0.79278 1.96782  
H -4.64788 0.53103 0.35965  
H 2.35116 -1.94838 -2.90629  
H 2.70197 -4.31473 -3.63436  
H 3.98684 -5.89378 -2.17865  
H 4.92350 -5.09617 0.00114  
H 4.57602 -2.73292 0.72241  
H -5.31048 2.57414 -3.21706  
H -5.25551 4.29872 -2.77962  
H -4.03833 3.62010 -3.88484  
H -4.95307 5.44042 -0.87500  
H -4.92869 4.83557 0.79689  
H -3.56776 5.80093 0.18224  
H 3.33182 5.40831 1.32141  
H 2.09305 5.15118 2.57146  
H 3.45270 4.01560 2.42441  
H 1.78413 5.40375 -2.08622  
H 3.10591 5.62558 -0.91528  
H 3.22120 4.35724 -2.15813  
C 4.87873 0.33609 -0.72363  
C 5.00629 1.72627 -0.48846  
C 6.24784 2.36595 -0.62051  
C 7.38120 1.63578 -1.01760  
C 7.26201 0.26157 -1.27431  
C 6.02304 -0.38517 -1.12451  
H 4.12331 2.31176 -0.20084  
H 6.32861 3.44068 -0.42329  
H 8.34824 2.13704 -1.13211  
H 8.13799 -0.31605 -1.58984  
H 5.94802 -1.45847 -1.32370

3. Ru(DPEphos)<sub>2</sub>H<sub>2</sub>

5ccc

SCF = -3050.34279863  
H(0 K) = -3049.290751  
G(298 K) = -3049.398271  
SCF(C6H6) = -3050.34972720  
Low Freq. = 15.3771cm<sup>-1</sup>, 18.5766cm<sup>-1</sup>

137

C -3.46097 1.19741 -1.58729  
C -2.44976 2.18265 -1.57322  
C -2.86677 3.53069 -1.58584  
C -4.22586 3.88201 -1.59017  
C -5.20560 2.87918 -1.58128  
C -4.82562 1.53042 -1.58307



P -0.63671 1.65001 -1.44986  
 C -0.30538 1.21801 -3.25755  
 C -1.23057 1.44187 -4.29887  
 C -0.91237 1.09614 -5.62375  
 C 0.33807 0.53485 -5.92920  
 C 1.26893 0.31360 -4.90070  
 C 0.94431 0.64529 -3.57571  
 Ru 0.02308 0.19892 0.38877  
 P 2.17340 0.95547 1.05831  
 C 3.50873 1.95023 0.14210  
 C 4.77391 2.15634 0.73763  
 C 5.78485 2.84672 0.05198  
 C 5.55135 3.33602 -1.24459  
 C 4.30283 3.12607 -1.84809  
 C 3.29213 2.43622 -1.15726  
 P -2.12898 -0.29600 1.23538  
 C -3.23805 1.14669 1.79060  
 C -4.59801 0.92858 2.10621  
 C -5.39103 1.96296 2.62475  
 C -4.84211 3.23764 2.83969  
 C -3.49437 3.46717 2.52817  
 C -2.70176 2.42985 2.00774  
 C -2.02865 -1.19377 2.89248  
 C -1.73335 -2.57355 2.93675  
 C -1.60159 -3.24341 4.16347  
 C -1.74288 -2.54108 5.37132  
 C -2.02078 -1.16585 5.33963  
 C -2.16974 -0.49845 4.11177  
 C -3.47444 -1.33599 0.38556  
 C -3.76571 -1.08963 -0.97456  
 C -4.73872 -1.81895 -1.67375  
 C -5.47916 -2.80570 -1.00717  
 C -5.23045 -3.05760 0.34965  
 C -4.23780 -2.33436 1.03104  
 P 0.59532 -1.95838 -0.68834  
 C -0.77354 -2.85826 -1.62762  
 C -1.19874 -2.33229 -2.86852  
 C -2.15204 -3.00758 -3.64557  
 C -2.72726 -4.20235 -3.18190  
 C -2.35220 -4.70563 -1.92759  
 C -1.37946 -4.04271 -1.15966  
 C 1.99557 -2.25204 -1.97497  
 C 1.85527 -3.04877 -3.13308  
 C 2.92685 -3.27540 -4.01349  
 C 4.18208 -2.70133 -3.76422  
 C 4.35593 -1.90430 -2.62376  
 C 3.27843 -1.70435 -1.74585  
 C 1.17192 -3.36750 0.45644  
 C 1.23826 -3.17865 1.84753  
 C 1.67441 -4.21091 2.69718  
 C 2.04799 -5.45279 2.16563  
 C 1.99007 -5.65516 0.77560  
 C 1.56232 -4.62158 -0.06961  
 C 0.10537 3.39356 -1.42473  
 C 0.35818 4.13199 -2.60118  
 C 0.87862 5.43539 -2.53145  
 C 1.14025 6.02859 -1.28607  
 C 0.88428 5.30616 -0.10972  
 C 0.37798 3.99873 -0.18046  
 C 2.02469 1.97355 2.64287  
 C 1.28774 1.44519 3.72799  
 C 1.13435 2.17352 4.91728  
 C 1.68667 3.46002 5.03743  
 C 2.39629 4.00596 3.95841  
 C 2.57155 3.26694 2.77429  
 C 3.32991 -0.41822 1.61797  
 C 3.81215 -1.24839 0.58315  
 C 4.63480 -2.35408 0.83254  
 C 5.00318 -2.63094 2.15905  
 C 4.56337 -1.80589 3.20583  
 C 3.73068 -0.70492 2.93426  
 H 0.37388 -0.52370 1.78914  
 H -0.30440 1.47432 1.30494  
 H -1.60588 -3.13275 2.00501  
 H -1.37851 -4.31555 4.16979  
 H -1.63830 -3.06243 6.32885  
 H -2.13570 -0.60601 6.27440

H -2.40068 0.57047 4.10605  
 H -5.04557 -0.05712 1.94965  
 H -6.44295 1.76908 2.86202  
 H -5.46191 4.04500 3.24459  
 H -3.05127 4.45630 2.68646  
 H -4.89709 -1.60187 -2.73365  
 H -6.24484 -3.37189 -1.54747  
 H -5.80761 -3.81878 0.88512  
 H -4.05736 -2.54801 2.08796  
 H 0.95266 -2.20547 2.25925  
 H 1.72233 -4.03351 3.77652  
 H 2.38875 -6.25798 2.82589  
 H 2.28336 -6.61956 0.34608  
 H 1.53579 -4.79387 -1.14995  
 H -0.76357 -1.40113 -3.24148  
 H -2.44384 -2.59348 -4.61681  
 H -3.46869 -4.73168 -3.79015  
 H -2.80514 -5.62672 -1.54515  
 H -1.07200 -4.47243 -0.20196  
 H 0.88593 -3.49932 -3.35967  
 H 2.77208 -3.90170 -4.89840  
 H 5.01915 -2.86664 -4.45041  
 H 5.31066 -1.41895 -2.39985  
 O 3.45614 -0.82253 -0.68830  
 H 4.97322 -2.98326 0.00437  
 H 5.64311 -3.49414 2.36935  
 H 3.38503 -0.06836 3.75466  
 H 4.97458 1.76674 1.74118  
 H 6.75896 2.99683 0.53064  
 H 6.34140 3.87269 -1.78113  
 H 4.10747 3.49796 -2.85942  
 H 2.32615 2.27345 -1.63737  
 H 0.80942 0.46584 3.62684  
 H 0.56814 1.73605 5.74662  
 H 1.55766 4.03309 5.96194  
 H 2.82444 5.01176 4.03332  
 H 3.13484 3.70862 1.94819  
 H 0.14948 3.68851 -3.57957  
 H 1.07507 5.98895 -3.45642  
 H 1.54525 7.04489 -1.23340  
 H 1.09039 5.75210 0.86918  
 H 0.21095 3.42634 0.73775  
 H -2.20347 1.89054 -4.07508  
 H -1.64536 1.27120 -6.41927  
 H 0.58393 0.26702 -6.96248  
 H 2.24267 -0.13582 -5.12094  
 H 1.66000 0.43955 -2.77389  
 H -2.11442 4.32274 -1.57909  
 H -4.51308 4.93832 -1.59293  
 H -6.26908 3.14041 -1.57632  
 H -5.57592 0.73517 -1.57868  
 O -3.03037 -0.12438 -1.66237  
 H 4.86471 -2.01712 4.23698  
 H -1.64884 2.60864 1.77058

5ccc' (from IRC)

SCF = -3050.33423059  
 H(0 K) = -3049.281869  
 G(298 K) = -3049.390616  
 SCF(C6H6) = -3050.34123065  
 BP86(D3BJ) = -3050.84876609  
 Low Freq. = 11.8472cm-1, 19.8233cm-1

137

C -2.92139 0.47446 -2.59443  
 C -1.99480 1.54173 -2.56506  
 C -1.92538 2.33493 -3.73337  
 C -2.67866 2.03994 -4.88103  
 C -3.53002 0.92552 -4.89987  
 C -3.65392 0.14019 -3.74530  
 P -0.91283 1.82069 -1.01187  
 C 0.26646 3.12914 -1.71699  
 C 0.97782 2.86334 -2.90927  
 C 1.90050 3.78841 -3.42381  
 C 2.15431 4.99022 -2.74241  
 C 1.47074 5.25572 -1.54605

C 0.53108 4.34025 -1.04216  
 Ru -0.02783 -0.02243 0.35646  
 P 2.06471 0.64829 1.20030  
 C 3.68246 0.94068 0.26511  
 C 4.93047 0.43021 0.67918  
 C 6.09861 0.72220 -0.04444  
 C 6.04288 1.54292 -1.18172  
 C 4.80654 2.06321 -1.59755  
 C 3.63522 1.75411 -0.88671  
 P -2.00828 -0.93443 1.23871  
 C -2.05700 -0.66427 3.11351  
 C -1.90035 -1.71801 4.03415  
 C -1.89927 -1.46858 5.41896  
 C -2.07665 -0.16626 5.90594  
 C -2.24884 0.89100 4.99550  
 C -2.22841 0.64578 3.61421  
 C -2.30411 -2.79355 1.20977  
 C -3.59767 -3.35350 1.16966  
 C -3.77425 -4.74607 1.21715  
 C -2.66268 -5.59696 1.31828  
 C -1.37134 -5.04738 1.36355  
 C -1.19122 -3.65660 1.30107  
 C -3.73887 -0.30277 0.81944  
 C -4.04455 0.01668 -0.52096  
 C -5.27571 0.58518 -0.88853  
 C -6.24882 0.80928 0.09496  
 C -5.99358 0.46152 1.43007  
 C -4.74940 -0.08464 1.78145  
 P 0.81132 -1.61641 -1.34511  
 C 1.06996 -0.95741 -3.10781  
 C 2.23065 -0.21780 -3.42942  
 C 2.44075 0.26824 -4.73026  
 C 1.47405 0.06400 -5.72848  
 C 0.30019 -0.63707 -5.41150  
 C 0.10581 -1.15287 -4.11885  
 C 2.53750 -2.37929 -1.09413  
 C 3.37763 -2.72391 -2.18047  
 C 4.66771 -3.24082 -1.99534  
 C 5.15990 -3.43452 -0.69560  
 C 4.34157 -3.14958 0.40253  
 C 3.04007 -2.65343 0.19748  
 C -0.11935 -3.20559 -1.80462  
 C 0.51867 -4.43776 -2.05785  
 C -0.22470 -5.56231 -2.45297  
 C -1.61611 -5.47363 -2.61094  
 C -2.26167 -4.25406 -2.35514  
 C -1.52113 -3.13380 -1.94468  
 C -2.06740 3.00426 -0.08355  
 C -3.20697 3.58913 -0.67334  
 C -3.98595 4.51974 0.03442  
 C -3.62939 4.90019 1.33698  
 C -2.48828 4.33682 1.92942  
 C -1.72154 3.39057 1.22908  
 C 2.00792 2.25113 2.20817  
 C 2.83720 3.35954 1.94701  
 C 2.73733 4.52944 2.72296  
 C 1.82547 4.60224 3.78516  
 C 1.00391 3.49563 4.06412  
 C 1.08604 2.33716 3.27768  
 C 2.71651 -0.51068 2.56660  
 C 2.65921 -1.92032 2.44244  
 C 3.00686 -2.77559 3.50067  
 C 3.48767 -2.24180 4.70476  
 C 3.62003 -0.85223 4.83449  
 C 3.23527 -0.00731 3.78071  
 H 0.31661 -1.11812 1.47275  
 H -0.43273 0.96225 1.55374  
 H -4.47433 -2.70194 1.10522  
 H -4.78636 -5.16430 1.17979  
 H -2.80142 -6.68284 1.35697  
 H -0.49644 -5.70249 1.43154  
 H -0.18146 -3.23302 1.31476  
 H -1.77605 -2.74361 3.67606  
 H -1.76674 -2.30375 6.11546  
 H -2.08519 0.02560 6.98427  
 H -2.40200 1.91283 5.36054  
 H -5.46619 0.83948 -1.93463

H -7.21088 1.24849 -0.18949  
 H -6.75537 0.62050 2.19992  
 H -4.55171 -0.33604 2.82694  
 H 1.60264 -4.52881 -1.94910  
 H 0.29137 -6.51069 -2.64043  
 H -2.19398 -6.35084 -2.92167  
 H -3.34941 -4.17489 -2.45589  
 H -2.03697 -2.19741 -1.71492  
 H 2.98967 -0.03295 -2.66399  
 H 3.36361 0.81375 -4.95697  
 H 1.63488 0.44532 -6.74261  
 H -0.46686 -0.80145 -6.17572  
 H -0.79946 -1.72868 -3.90726  
 H 3.01411 -2.57318 -3.19971  
 H 5.28422 -3.48615 -2.86602  
 H 6.16991 -3.82587 -0.53396  
 H 4.68987 -3.32364 1.42465  
 O 2.17304 -2.51030 1.27560  
 H 2.89723 -3.85476 3.35586  
 H 3.76286 -2.90905 5.52806  
 H 3.32423 1.07403 3.91261  
 H 4.99635 -0.19587 1.57323  
 H 7.05708 0.30911 0.28876  
 H 6.95642 1.77506 -1.73976  
 H 4.74249 2.71141 -2.47812  
 H 2.67686 2.15771 -1.22596  
 H 3.56891 3.31803 1.13593  
 H 3.38680 5.38188 2.49538  
 H 1.75632 5.51006 4.39408  
 H 0.29391 3.53034 4.89784  
 H 0.43216 1.48696 3.50029  
 H -3.49327 3.32212 -1.69422  
 H -4.87352 4.95153 -0.44101  
 H -4.23421 5.63093 1.88468  
 H -2.18594 4.63099 2.94047  
 H -0.83620 2.95324 1.70140  
 H 0.80781 1.92927 -3.44935  
 H 2.42065 3.56038 -4.36076  
 H 2.87468 5.71260 -3.14101  
 H 1.65655 6.18775 -1.00128  
 H -0.00186 4.58233 -0.11893  
 H -1.26171 3.20252 -3.75081  
 H -2.59040 2.68283 -5.76295  
 H -4.10460 0.67506 -5.79760  
 H -4.31975 -0.72755 -3.71100  
 O -3.07727 -0.32343 -1.46190  
 H 4.00973 -0.41708 5.76048  
 H -2.36200 1.47935 2.91715

TS(5-9) ccc

SCF = -3050.28854574  
 H(0 K) = -3049.239059  
 G(298 K) = -3049.343606  
 SCF(C6H6) = -3050.29520578  
 Low Freq. = -462.1166cm<sup>-1</sup>, 23.0332cm<sup>-1</sup>

137

C -2.36720 1.28317 -2.80025  
 C -1.12239 1.93643 -2.64783  
 C -0.61292 2.57796 -3.79990  
 C -1.28049 2.53188 -5.03474  
 C -2.48843 1.83119 -5.16059  
 C -3.03495 1.20379 -4.03213  
 P -0.26000 1.92284 -0.93758  
 C 1.35142 2.80042 -1.37950  
 C 2.15409 2.35407 -2.45261  
 C 3.34633 3.01890 -2.78378  
 C 3.78174 4.11679 -2.02446  
 C 3.01863 4.53657 -0.92239  
 C 1.81159 3.89093 -0.60762  
 Ru -0.08495 0.00189 0.44709  
 P 2.14361 0.19029 1.36726  
 C 3.83514 -0.07990 0.59532  
 C 4.54736 -1.28291 0.77244  
 C 5.80838 -1.45874 0.17648  
 C 6.37582 -0.43397 -0.59699

C 5.67536 0.77282 -0.76929  
 C 4.41467 0.94862 -0.18020  
 P -2.36923 -0.43228 0.95094  
 C -2.69146 -0.56096 2.81544  
 C -3.78878 -1.30412 3.30779  
 C -4.06832 -1.34966 4.68304  
 C -3.25787 -0.65410 5.59459  
 C -2.16146 0.08030 5.11924  
 C -1.87920 0.12227 3.74372  
 C -3.25997 -2.00335 0.42175  
 C -4.57756 -2.00149 -0.07917  
 C -5.22419 -3.21147 -0.38455  
 C -4.56576 -4.43435 -0.18359  
 C -3.25329 -4.44200 0.31660  
 C -2.59982 -3.23607 0.61135  
 C -3.66580 0.86140 0.52101  
 C -3.72593 1.31431 -0.81340  
 C -4.57368 2.35890 -1.21056  
 C -5.40770 2.95695 -0.25437  
 C -5.39432 2.50718 1.07475  
 C -4.52735 1.47008 1.45531  
 P 0.60844 -1.76386 -1.23377  
 C 1.53277 -1.19643 -2.78660  
 C 2.92216 -0.94101 -2.75684  
 C 3.60064 -0.51055 -3.90923  
 C 2.90092 -0.29711 -5.10757  
 C 1.51459 -0.51900 -5.14138  
 C 0.83898 -0.97081 -3.99561  
 C 1.83096 -3.04183 -0.58076  
 C 2.84666 -3.67723 -1.32869  
 C 3.71778 -4.59879 -0.72654  
 C 3.59230 -4.90063 0.64159  
 C 2.57498 -4.30637 1.39979  
 C 1.68440 -3.40571 0.77967  
 C -0.61833 -2.91633 -2.09485  
 C -0.30877 -4.25207 -2.42471  
 C -1.21821 -5.03661 -3.15193  
 C -2.44584 -4.49738 -3.56755  
 C -2.76591 -3.17226 -3.23523  
 C -1.86308 -2.39114 -2.49530  
 C -1.17617 3.43735 -0.23390  
 C -1.35015 4.58885 -1.03502  
 C -1.95885 5.74075 -0.51738  
 C -2.41187 5.76384 0.81270  
 C -2.25529 4.62422 1.61380  
 C -1.64161 3.47150 1.09217  
 C 2.57310 1.72680 2.38927  
 C 3.89126 1.95912 2.84527  
 C 4.18537 3.05979 3.66556  
 C 3.17148 3.95500 4.04266  
 C 1.86075 3.73887 3.59124  
 C 1.56838 2.63516 2.77308  
 C 2.00204 -1.12033 2.68595  
 C 0.79429 -1.92973 2.56656  
 C 0.30440 -2.53111 3.77653  
 C 1.00915 -2.42799 4.97840  
 C 2.24197 -1.75096 5.04558  
 C 2.70366 -1.07997 3.89719  
 H -0.04235 -1.04619 1.91131  
 H -0.37931 1.03872 1.63123  
 H -5.11041 -1.05571 -0.21738  
 H -6.24889 -3.19430 -0.77241  
 H -5.07188 -5.37709 -0.41779  
 H -2.72778 -5.39083 0.46746  
 H -1.56821 -3.24939 0.97964  
 H -4.43442 -1.84891 2.61319  
 H -4.92439 -1.93285 5.03972  
 H -3.47458 -0.69281 6.66760  
 H -1.50750 0.61196 5.81842  
 H -4.57630 2.69277 -2.25184  
 H -6.07238 3.77318 -0.55583  
 H -6.05139 2.96686 1.81985  
 H -4.50894 1.13626 2.49638  
 H 0.64561 -4.68713 -2.11521  
 H -0.96123 -6.07335 -3.39646  
 H -3.15242 -5.10991 -4.13810  
 H -3.72927 -2.74623 -3.53404

H -2.13631 -1.37387 -2.20581  
 H 3.48730 -1.08465 -1.83324  
 H 4.68081 -0.33746 -3.85754  
 H 3.42982 0.03683 -6.00687  
 H 0.95154 -0.35282 -6.06597  
 H -0.23626 -1.16284 -4.05362  
 H 2.96558 -3.44462 -2.39074  
 H 4.49447 -5.08213 -1.32834  
 H 4.27489 -5.61651 1.11250  
 H 2.43253 -4.54374 2.45815  
 O 0.58440 -2.92027 1.43223  
 H -0.61175 -3.12679 3.71860  
 H 0.60740 -2.92237 5.87067  
 H 3.58049 -0.42757 3.97844  
 H 4.11668 -2.08382 1.38050  
 H 6.34511 -2.40208 0.32280  
 H 7.36057 -0.57092 -1.05705  
 H 6.10905 1.58494 -1.36270  
 H 3.88758 1.89742 -0.31239  
 H 4.69948 1.28298 2.55159  
 H 5.21423 3.21761 4.00742  
 H 3.40329 4.81597 4.67887  
 H 1.05968 4.43368 3.86628  
 H 0.54852 2.47451 2.41346  
 H -1.00399 4.58994 -2.07316  
 H -2.07842 6.62313 -1.15562  
 H -2.88810 6.66328 1.21771  
 H -2.61588 4.62242 2.64797  
 H -1.52942 2.57954 1.71530  
 H 1.84662 1.49005 -3.04609  
 H 3.93558 2.66221 -3.63484  
 H 4.71103 4.63579 -2.28282  
 H 3.35400 5.37855 -0.30757  
 H 1.22242 4.24770 0.24121  
 H 0.33150 3.12352 -3.73685  
 H -0.84650 3.04443 -5.89956  
 H -3.00708 1.77753 -6.12319  
 H -3.97906 0.65291 -4.08216  
 O -2.92933 0.61320 -1.71336  
 H 2.79655 -1.68485 5.98627  
 H -1.00652 0.67528 3.38403

9ccc (from IRC)

SCF = -3050.37443468  
 H(0 K) = -3049.319992  
 G(298 K) = -3049.427895  
 SCF(C6H6) = -3050.38156243  
 BP86(D3BJ) = -3050.90086685  
 Low Freq. = 10.7689cm-1, 16.8291cm-1

137

C -2.55169 0.72861 -2.82725  
 C -1.17694 0.99281 -3.01583  
 C -0.72497 1.01443 -4.35446  
 C -1.58977 0.76816 -5.43428  
 C -2.94453 0.48852 -5.20783  
 C -3.42706 0.46361 -3.89172  
 P -0.07003 1.40667 -1.50260  
 C 1.56338 1.63011 -2.42702  
 C 2.10941 0.53365 -3.13122  
 C 3.29755 0.67023 -3.86797  
 C 3.98422 1.89530 -3.88203  
 C 3.47184 2.98007 -3.15302  
 C 2.26718 2.85302 -2.44090  
 Ru -0.01411 0.04767 0.40821  
 P 2.32283 0.39397 0.98487  
 C 3.70907 -0.72952 0.39377  
 C 3.99355 -1.92714 1.09034  
 C 5.00860 -2.78916 0.64498  
 C 5.75540 -2.47493 -0.50328  
 C 5.46156 -1.30214 -1.21669  
 C 4.44051 -0.44224 -0.77886  
 P -2.28425 0.26128 1.22053  
 C -2.30018 0.74213 3.05204  
 C -3.02852 0.01412 4.01524  
 C -3.06497 0.42996 5.35745

C -2.39104 1.59169 5.76096  
 C -1.67006 2.33299 4.81040  
 C -1.61993 1.90553 3.47424  
 C -3.48327 -1.18307 1.27920  
 C -4.84411 -1.05321 0.93655  
 C -5.71269 -2.15168 1.04584  
 C -5.23557 -3.38742 1.50907  
 C -3.88248 -3.52189 1.86010  
 C -3.00919 -2.43023 1.74071  
 C -3.40647 1.61429 0.55602  
 C -3.58068 1.67324 -0.84297  
 C -4.30266 2.70053 -1.46697  
 C -4.90504 3.68258 -0.66639  
 C -4.79438 3.62336 0.73175  
 C -4.04861 2.59704 1.33504  
 P 0.04517 -2.19582 -0.62397  
 C 1.04018 -2.69830 -2.14009  
 C 2.42110 -2.97565 -2.07329  
 C 3.13930 -3.30957 -3.23450  
 C 2.49698 -3.35808 -4.48127  
 C 1.12314 -3.07338 -4.55979  
 C 0.40067 -2.75228 -3.40069  
 C 0.79687 -3.11630 0.79041  
 C 1.43098 -4.37558 0.74610  
 C 1.87134 -5.00505 1.91934  
 C 1.65331 -4.36930 3.15964  
 C 1.03296 -3.11909 3.22959  
 C 0.60857 -2.44732 2.04302  
 C -1.47492 -3.25048 -1.03811  
 C -1.46696 -4.65148 -0.87209  
 C -2.56308 -5.42630 -1.28002  
 C -3.68543 -4.81526 -1.86326  
 C -3.70796 -3.42186 -2.01989  
 C -2.61188 -2.64583 -1.60561  
 C -0.62242 3.22241 -1.39356  
 C -0.69929 4.03353 -2.54805  
 C -1.09411 5.37631 -2.45646  
 C -1.43229 5.93021 -1.20998  
 C -1.37638 5.13008 -0.05944  
 C -0.97283 3.78737 -0.15552  
 C 3.08338 2.11652 0.78037  
 C 4.46814 2.34703 0.63589  
 C 4.97948 3.65473 0.62382  
 C 4.12271 4.75674 0.77261  
 C 2.74723 4.53789 0.94389  
 C 2.23793 3.22985 0.94870  
 C 2.63119 0.33691 2.85479  
 C 1.58042 0.56116 3.76329  
 C 1.83527 0.65648 5.14187  
 C 3.14276 0.52961 5.63350  
 C 4.19967 0.31678 4.73358  
 C 3.94711 0.22718 3.35644  
 H 0.55906 0.64050 3.39264  
 H 0.02705 1.35105 1.36646  
 H -5.23464 -0.09030 0.59441  
 H -6.76775 -2.03523 0.77417  
 H -5.91482 -4.24208 1.59716  
 H -3.49820 -4.48194 2.21925  
 H -1.95717 -2.53222 2.02052  
 H -3.57341 -0.88633 3.72259  
 H -3.63010 -0.16035 6.08678  
 H -2.42613 1.91823 6.80580  
 H -1.13574 3.24190 5.10697  
 H -4.38944 2.72469 -2.55669  
 H -5.47199 4.48972 -1.14181  
 H -5.28266 4.37840 1.35600  
 H -3.95276 2.56678 2.42362  
 H -0.60696 -5.14347 -0.40977  
 H -2.53820 -6.51297 -1.14110  
 H -4.53984 -5.42157 -2.18320  
 H -4.58467 -2.93012 -2.45471  
 H -2.65321 -1.55999 -1.69525  
 H 2.94043 -2.94003 -1.11295  
 H 4.20874 -3.53037 -3.15301  
 H 3.05872 -3.62268 -5.38375  
 H 0.60614 -3.11110 -5.52485  
 H -0.67300 -2.55504 -3.47669

H 1.60527 -4.85724 -0.22280  
 H 2.37560 -5.97529 1.87017  
 H 1.98698 -4.85295 4.08537  
 H 0.88473 -2.60934 4.18649  
 O 0.05714 -1.24236 2.14384  
 H 0.99765 0.82638 5.82688  
 H 3.33992 0.59958 6.70891  
 H 4.78677 0.07350 2.67266  
 H 3.42710 -2.18852 1.98905  
 H 5.21132 -3.70918 1.20277  
 H 6.55672 -3.14151 -0.84026  
 H 6.02587 -1.04865 -2.12066  
 H 4.22419 0.46147 -1.35341  
 H 5.16084 1.50779 0.53489  
 H 6.05756 3.80850 0.50353  
 H 4.52531 5.77534 0.76381  
 H 2.06158 5.38306 1.06761  
 H 1.16761 3.06261 1.08635  
 H -0.44647 3.61557 -3.52756  
 H -1.14014 5.99044 -3.36249  
 H -1.74483 6.97763 -1.13942  
 H -1.65481 5.54414 0.91533  
 H -0.94132 3.15383 0.73525  
 H 1.59884 -0.43262 -3.12448  
 H 3.68393 -0.19352 -4.41838  
 H 4.91337 2.00252 -4.45221  
 H 4.00399 3.93703 -3.13977  
 H 1.88081 3.71521 -1.89277  
 H 0.32625 1.22561 -4.56293  
 H -1.19465 0.79396 -6.45509  
 H -3.62152 0.28580 -6.04390  
 H -4.47281 0.23175 -3.66814  
 O -3.03673 0.59831 -1.52814  
 H 5.22784 0.22485 5.10052  
 H -1.03476 2.48215 2.75137

Scct (lowest conf)

SCF = -3050.31565805  
 H(0 K) = -3049.265430  
 G(298 K) = -3049.372250  
 SCF(C6H6) = -3050.32270708  
 Low Freq. = 13.9902cm-1, 15.9991cm-1

137

C 2.02331 -4.17123 1.29201  
 C 1.33263 -2.95761 1.50270  
 C 0.26296 -2.94542 2.42410  
 C -0.08362 -4.10431 3.13653  
 C 0.60954 -5.30570 2.91962  
 C 1.65758 -5.33690 1.98716  
 P 1.84836 -1.31934 0.70522  
 C 2.94995 -0.73543 2.15654  
 C 3.19159 -1.54135 3.29341  
 C 3.99791 -1.10613 4.35868  
 C 4.59176 0.16313 4.32258  
 C 4.37664 0.98610 3.20905  
 C 3.57961 0.53115 2.14609  
 C 3.22410 -1.90089 -0.45498  
 C 2.99915 -1.81865 -1.84080  
 C 3.96604 -2.27928 -2.75016  
 C 5.17088 -2.82538 -2.28306  
 C 5.41260 -2.89805 -0.90064  
 C 4.44871 -2.43374 0.00746  
 Ru 0.02131 0.01352 -0.01333  
 P -1.82790 1.24767 0.86057  
 C -1.92521 1.38881 2.76204  
 C -0.80312 1.16536 3.58202  
 C -0.88677 1.30203 4.97873  
 C -2.10113 1.66046 5.58235  
 C -3.22916 1.88756 4.77709  
 C -3.14074 1.75765 3.38217  
 P 1.24267 1.92283 -0.73540  
 C 0.66821 2.68028 -2.38012  
 C 0.51383 1.83708 -3.50443  
 C 0.15182 2.35312 -4.75903  
 C -0.08395 3.72930 -4.91516

C 0.04760 4.57557 -3.80503  
 C 0.42323 4.05822 -2.55242  
 P -1.30958 -1.74229 -0.91014  
 C -2.72046 -1.19106 -2.04675  
 C -3.84081 -2.00688 -2.30629  
 C -4.80303 -1.61813 -3.25217  
 C -4.65426 -0.41758 -3.96473  
 C -3.53854 0.39759 -3.71847  
 C -2.58391 0.01531 -2.76166  
 C 1.57801 3.48774 0.28603  
 C 2.44959 4.49917 -0.17567  
 C 2.75402 5.60548 0.63259  
 C 2.20419 5.71087 1.92147  
 C 1.35573 4.69962 2.39633  
 C 1.04889 3.59726 1.58177  
 C 3.04664 1.61887 -1.20212  
 C 3.61097 1.66365 -2.48986  
 C 4.97257 1.37507 -2.68886  
 C 5.79069 1.04202 -1.59852  
 C 5.25954 1.01889 -0.29977  
 C 3.90188 1.31455 -0.12337  
 C -2.22796 -3.08625 0.09161  
 C -2.26174 -4.45726 -0.25105  
 C -2.86384 -5.41570 0.58101  
 C -3.44759 -5.02903 1.79607  
 C -3.46252 -3.67183 2.14921  
 C -2.88646 -2.72399 1.28966  
 C -0.40818 -2.84076 -2.16471  
 C -0.46663 -2.54894 -3.54475  
 C 0.23993 -3.32597 -4.47749  
 C 1.00939 -4.42066 -4.05348  
 C 1.07817 -4.71915 -2.68451  
 C 0.38568 -3.93189 -1.75022  
 C -2.12351 3.06429 0.40625  
 C -2.21278 4.10686 1.35286  
 C -2.50744 5.41992 0.95196  
 C -2.73644 5.71448 -0.40097  
 C -2.64331 4.68837 -1.35375  
 C -2.32236 3.38032 -0.95467  
 C -3.62256 0.66380 0.61705  
 C -3.96159 -0.63663 1.04191  
 C -5.26216 -1.14971 0.91185  
 C -6.26561 -0.35175 0.34686  
 C -5.96323 0.95037 -0.07503  
 C -4.65778 1.44796 0.06586  
 H 0.15274 -0.04912 -1.67774  
 H 0.04854 -0.22851 1.62381  
 H -3.96632 -2.95219 -1.76999  
 H -5.67135 -2.26105 -3.43386  
 H -5.40401 -0.11987 -4.70583  
 H -3.40490 1.33501 -4.26952  
 H -1.70804 0.64180 -2.56196  
 H -1.07659 -1.71428 -3.90113  
 H 0.17269 -3.07944 -5.54300  
 H 1.54975 -5.03407 -4.78234  
 H 1.68079 -5.56360 -2.33330  
 H 0.46495 -4.17797 -0.68889  
 H -1.80434 -4.78742 -1.18693  
 H -2.86850 -6.46726 0.27579  
 H -3.90325 -5.77280 2.45804  
 H -3.92657 -3.32308 3.07712  
 O -2.95143 -1.38030 1.65754  
 H -5.47731 -2.16681 1.25069  
 H -7.28080 -0.74936 0.24413  
 H -6.73943 1.58609 -0.51306  
 H -4.44325 2.46713 -0.26292  
 H -2.05938 3.89690 2.41422  
 H -2.56449 6.21303 1.70544  
 H -2.97999 6.73643 -0.71092  
 H -2.80580 4.90214 -2.41510  
 H -2.24417 2.59176 -1.70845  
 H 0.13932 0.85496 3.11690  
 H 0.00231 1.11827 5.59172  
 H -2.17083 1.75890 6.67115  
 H -4.18571 2.16482 5.23370  
 H -4.03066 1.94042 2.77209  
 H 2.98376 1.92033 -3.34807

H 5.39082 1.40881 -3.70009  
 H 6.84933 0.80921 -1.75293  
 H 5.88128 0.78012 0.56823  
 O 3.31633 1.43365 1.12886  
 H 2.90883 4.41499 -1.16627  
 H 3.43104 6.38099 0.25739  
 H 2.44711 6.57112 2.55479  
 H 0.93540 4.75957 3.40616  
 H 0.41878 2.79241 1.96862  
 H 0.67053 0.75899 -3.38707  
 H 0.05133 1.67514 -5.61367  
 H -0.37112 4.13481 -5.89136  
 H -0.14361 5.64968 -3.90559  
 H 0.51050 4.73992 -1.70366  
 H 2.73503 -2.53117 3.35642  
 H 4.15333 -1.76608 5.21849  
 H 5.21456 0.51385 5.15201  
 H 4.80414 1.99096 3.14261  
 H 4.65211 -2.48363 1.08241  
 H 6.35593 -3.31201 -0.52712  
 H 5.92472 -3.18478 -2.99217  
 H 3.77167 -2.21103 -3.82542  
 H 2.05886 -1.38463 -2.19780  
 H -0.29410 -2.01546 2.58000  
 H -0.91079 -4.06768 3.85230  
 H 0.33186 -6.21127 3.46956  
 H 2.20384 -6.26855 1.80227  
 H 2.85685 -4.21040 0.58551

5cct (from IRC)

SCF = -3050.30870370  
 H(0 K) = -3049.258299  
 G(298 K) = -3049.364005  
 SCF(C6H6) = -3050.31642846  
 BP86 (D3BJ) = -3050.83591557  
 Low Freq. = 14.2336cm-1, 18.1403cm-1

137

C 4.46509 1.94984 0.40461  
 C 3.53980 1.17271 -0.31980  
 C 4.04099 0.07384 -1.04399  
 C 5.40762 -0.24065 -1.07520  
 C 6.30803 0.55007 -0.34702  
 C 5.83570 1.63983 0.39924  
 P 1.69124 1.56793 -0.52138  
 C 1.72206 3.21315 0.41139  
 C 1.81897 4.48893 -0.17874  
 C 1.91154 5.64105 0.61952  
 C 1.91078 5.54089 2.01920  
 C 1.79951 4.27624 2.61857  
 C 1.70118 3.12597 1.82013  
 O 3.10943 -0.65205 -1.78480  
 C 3.15272 -2.03957 -1.66344  
 C 2.54211 -2.67903 -0.55404  
 C 2.60900 -4.08938 -0.53599  
 C 3.25233 -4.81983 -1.54809  
 C 3.82623 -4.15746 -2.64092  
 C 3.76536 -2.75841 -2.70114  
 P 1.57722 -1.63456 0.71394  
 C 0.97766 -2.93344 1.96309  
 C -0.33297 -2.84153 2.46484  
 C -0.79170 -3.72437 3.45886  
 C 0.06254 -4.70856 3.97551  
 C 1.38804 -4.78433 3.51376  
 C 1.84576 -3.89708 2.52842  
 Ru -0.01679 -0.01199 0.02184  
 P -1.60311 1.70788 0.53507  
 C -1.40799 3.43650 -0.21668  
 C -1.21113 3.50845 -1.61225  
 C -1.16514 4.74322 -2.27852  
 C -1.30655 5.93722 -1.55347  
 C -1.47786 5.88002 -0.16171  
 C -1.52908 4.64275 0.50192  
 P -1.68829 -1.57538 -0.69476  
 C -2.97937 -2.46213 0.43255  
 C -3.59741 -1.73573 1.47779

C -4.40433 -2.34574 2.45150  
 C -4.68788 -3.71624 2.35885  
 C -4.17021 -4.44960 1.28132  
 C -3.32761 -3.82998 0.34304  
 C -1.00981 -3.08621 -1.61153  
 C -0.88592 -3.05443 -3.01720  
 C -0.43744 -4.17866 -3.72736  
 C -0.12007 -5.36560 -3.04915  
 C -0.21179 -5.40104 -1.65039  
 C -0.62987 -4.26581 -0.93573  
 C -2.88291 -1.01872 -2.06415  
 C -2.55364 0.07355 -2.88599  
 C -3.34506 0.41005 -3.99680  
 C -4.48812 -0.34404 -4.29999  
 C -4.83515 -1.42959 -3.47933  
 C -4.04055 -1.76493 -2.37253  
 C 1.90489 2.11714 -2.33383  
 C 2.95972 2.98552 -2.69850  
 C 3.14837 3.36752 -4.03593  
 C 2.30155 2.87090 -5.04041  
 C 1.27652 1.97746 -4.69530  
 C 1.08580 1.60527 -3.35399  
 C -3.43655 1.50264 0.09832  
 C -4.17561 2.35747 -0.74377  
 C -5.53691 2.12803 -1.00226  
 C -6.18900 1.03592 -0.41165  
 C -5.48186 0.17780 0.44197  
 C -4.12194 0.42263 0.68679  
 C -1.91628 2.15069 2.36155  
 C -3.03321 2.94212 2.71676  
 C -3.28686 3.27103 4.05765  
 C -2.43459 2.80832 5.07342  
 C -1.33206 2.01021 4.73445  
 C -1.08031 1.68759 3.39049  
 C 2.98322 -1.08762 1.86711  
 C 4.29334 -1.59566 1.77324  
 C 5.25148 -1.28896 2.75468  
 C 4.91148 -0.48517 3.85259  
 C 3.60265 0.01168 3.96342  
 C 2.64981 -0.28803 2.97906  
 H 0.00117 -0.04027 1.68709  
 H 0.04208 -0.22191 -1.63587  
 H 4.57379 -2.23378 0.93040  
 H 6.26805 -1.68518 2.65643  
 H 5.65867 -0.25081 4.61834  
 H 3.31956 0.63141 4.82140  
 H 1.62315 0.07920 3.07253  
 H -0.97920 -2.04432 2.09102  
 H -1.81995 -3.63162 3.82329  
 H -0.29131 -5.39905 4.74878  
 H 2.07630 -5.52583 3.93419  
 H 2.89663 -3.93555 2.22653  
 H 2.13207 -4.63730 0.27892  
 H 3.28199 -5.91249 -1.48629  
 H 4.31441 -4.72046 -3.44314  
 H 4.18765 -2.19894 -3.54135  
 H 5.75058 -1.10020 -1.65865  
 H 7.37689 0.31208 -0.36577  
 H 6.53153 2.25794 0.97562  
 H 4.11298 2.80821 0.98222  
 H 1.79836 4.59588 -1.26553  
 H 1.97656 6.62299 0.13850  
 H 1.98630 6.44134 2.63833  
 H 1.78385 4.18085 3.70948  
 H 1.61898 2.14252 2.29029  
 H 3.65640 3.35144 -1.93826  
 H 3.97002 4.04509 -4.29290  
 H 2.45380 3.16338 -6.08508  
 H 0.62843 1.55525 -5.47140  
 H 0.32144 0.87061 -3.07764  
 H -1.08856 2.58510 -2.18349  
 H -1.01099 4.76636 -3.36258  
 H -1.27300 6.90386 -2.06765  
 H -1.56983 6.80444 0.41890  
 H -3.72142 3.29556 1.94265  
 H -4.16019 3.88369 4.30719  
 H -2.63672 3.05852 6.12059

H -0.66899 1.62500 5.51709  
 H -0.24907 1.02909 3.11822  
 H -3.68080 3.21257 -1.21055  
 H -6.08313 2.80516 -1.66677  
 H -7.25018 0.85010 -0.60784  
 H -5.97285 -0.67630 0.91681  
 O -3.38859 -0.36295 1.57948  
 H -1.65958 0.65044 -2.63718  
 H -3.06696 1.26623 -4.62117  
 H -5.10772 -0.08635 -5.16576  
 H -5.72900 -2.02304 -3.70106  
 H -2.92425 -4.43434 -0.47257  
 H -4.41025 -5.51210 1.16959  
 H -5.32562 -4.19689 3.10798  
 H -4.81459 -1.72340 3.25271  
 H -0.67582 -4.31064 0.15616  
 H 0.04970 -6.31360 -1.10347  
 H 0.20471 -6.25134 -3.60534  
 H -0.35463 -4.12790 -4.81847  
 H -1.15935 -2.14987 -3.56731  
 H -1.65275 4.62587 1.58716  
 H -4.32587 -2.61745 -1.74965

TS (5-9) cct

SCF = -3050.25020474  
 H(0 K) = -3049.202713  
 G(298 K) = -3049.308167  
 SCF(C6H6) = -3050.25735062  
 Low Freq. = -958.8278cm<sup>-1</sup>, 13.1310cm<sup>-1</sup>

137

C 4.84533 -1.28895 -0.23851  
 C 3.55638 -1.09286 -0.76650  
 C 3.07251 -2.00439 -1.73150  
 C 3.81818 -3.13087 -2.12035  
 C 5.08941 -3.32643 -1.55956  
 C 5.60524 -2.40333 -0.63284  
 P 2.37506 0.35719 -0.49168  
 C 3.39558 1.37155 0.72135  
 C 3.76674 2.71280 0.49320  
 C 4.51354 3.42347 1.44868  
 C 4.90698 2.80901 2.64615  
 C 4.53600 1.47661 2.88930  
 C 3.78108 0.76966 1.94113  
 O 1.90421 -1.62810 -2.34604  
 C 0.67632 -2.42977 -2.14663  
 C 0.53409 -3.29528 -0.97674  
 C 0.12342 -4.62809 -1.14895  
 C -0.19580 -5.15310 -2.41127  
 C -0.17212 -4.29377 -3.52928  
 C 0.25960 -2.97486 -3.40913  
 P 0.49263 -2.32567 0.59547  
 C -0.65479 -3.18461 1.82826  
 C -1.59370 -2.40178 2.52481  
 C -2.41406 -2.97112 3.51491  
 C -2.30594 -4.33576 3.81813  
 C -1.34832 -5.12091 3.15222  
 C -0.51627 -4.54693 2.18018  
 Ru 0.01986 -0.08197 -0.02403  
 P -0.32618 2.26211 0.53011  
 C 0.63748 3.67639 -0.28415  
 C 0.66618 3.72323 -1.69331  
 C 1.30062 4.77620 -2.37236  
 C 1.92001 5.80702 -1.64807  
 C 1.89601 5.77451 -0.24456  
 C 1.26281 4.71883 0.43240  
 P -2.32059 -0.41324 -0.56300  
 C -3.72935 -0.46968 0.74200  
 C -3.70667 0.38767 1.86780  
 C -4.58842 0.23684 2.94974  
 C -5.59010 -0.74381 2.89818  
 C -5.69975 -1.55020 1.75628  
 C -4.77780 -1.41756 0.70469  
 C -2.82502 -1.95817 -1.53282  
 C -3.26134 -1.88803 -2.87322  
 C -3.73977 -3.03118 -3.53499

C -3.79210 -4.26507 -2.87192  
 C -3.33887 -4.35208 -1.54686  
 C -2.85335 -3.21353 -0.88643  
 C -3.01375 0.86090 -1.77037  
 C -2.16026 1.34313 -2.78234  
 C -2.64741 2.18580 -3.79416  
 C -3.99865 2.56721 -3.79992  
 C -4.85584 2.09384 -2.79384  
 C -4.37076 1.23843 -1.79109  
 C 2.79405 1.17152 -2.15172  
 C 4.09004 1.65274 -2.43264  
 C 4.40571 2.15295 -3.70614  
 C 3.44000 2.15460 -4.72558  
 C 2.15921 1.64123 -4.46554  
 C 1.84308 1.15401 -3.18792  
 C -2.02988 3.08123 0.39344  
 C -2.31415 4.23515 -0.36491  
 C -3.59548 4.80976 -0.36737  
 C -4.61972 1.65274 0.40726  
 C -4.36381 3.10060 1.17378  
 C -3.08058 2.53190 1.15187  
 C -0.03915 2.69723 2.35943  
 C -0.62044 3.85104 2.93246  
 C -0.40557 4.17060 4.28252  
 C 0.40296 3.34857 5.08392  
 C 0.99611 2.20893 4.52123  
 C 0.77333 1.88717 3.17212  
 C 2.01984 -2.79179 1.59443  
 C 2.87406 -3.83669 1.19635  
 C 3.90412 -4.27549 2.04620  
 C 4.08364 -3.68592 3.30638  
 C 3.22468 -2.65168 3.71740  
 C 2.19922 -2.20850 2.86807  
 H -0.04238 0.00787 1.57018  
 H 0.00084 -1.16423 -1.63509  
 H 2.73718 -4.30062 0.21508  
 H 4.56656 -5.08345 1.71739  
 H 4.88276 -4.03367 3.96973  
 H 3.34762 -2.19422 4.70539  
 H 1.51447 -1.42094 3.20259  
 H -1.66299 -1.33490 2.29278  
 H -3.13982 -2.34060 4.03843  
 H -2.94943 -4.78491 4.58234  
 H -1.23335 -6.18059 3.40542  
 H 0.27406 -5.15586 1.73090  
 H -0.01453 -5.26290 -0.26881  
 H -0.50679 -6.19693 -2.51274  
 H -0.45205 -4.67505 -4.51809  
 H 0.37609 -2.34346 -4.29596  
 H 3.40658 -3.81291 -2.87005  
 H 5.68914 -4.19142 -1.86341  
 H 6.60613 -2.54907 -0.21337  
 H 5.26056 -0.58035 0.48367  
 H 3.47839 3.21211 -0.43438  
 H 4.78624 4.46496 1.24734  
 H 5.49535 3.36329 3.38518  
 H 4.83438 0.98082 3.81952  
 H 3.49873 -0.26701 2.14877  
 H 4.86586 1.62617 -1.66162  
 H 5.41541 2.52927 -3.90345  
 H 3.69059 2.53699 -5.72106  
 H 1.40676 1.60903 -5.26146  
 H 0.86064 0.71903 -2.97810  
 H 0.17946 2.92950 -2.26476  
 H 1.31873 4.77928 -3.46698  
 H 2.41878 6.62844 -2.17363  
 H 2.37575 6.57297 0.33234  
 H -1.25329 4.50435 2.32413  
 H -0.87591 5.06432 4.70724  
 H 0.56783 3.59539 6.13837  
 H 1.63473 1.56172 5.13198  
 H 1.22383 0.99022 2.73981  
 H -1.52328 4.69465 -0.96234  
 H -3.78581 5.70287 -0.97102  
 H -5.61834 4.69496 0.42074  
 H -5.14771 2.64295 1.78380  
 O -2.77024 1.41713 1.93581

H -1.10939 1.03646 -2.76593  
 H -1.96983 2.54482 -4.57656  
 H -4.38188 3.22941 -4.58369  
 H -5.91133 2.38669 -2.78908  
 H -4.86886 -2.08166 -0.15709  
 H -6.49473 -2.29929 1.68241  
 H -6.28863 -0.85883 3.73354  
 H -4.48401 0.91208 3.80458  
 H -2.53138 -3.30004 0.15423  
 H -3.36045 -5.31013 -1.01714  
 H -4.17668 -5.15345 -3.38434  
 H -4.08029 -2.94670 -4.57275  
 H -3.24789 -0.93590 -3.40790  
 H 1.26494 4.70795 1.52485  
 H -5.05402 0.86385 -1.02324

9cct (from IRC)

SCF = -3050.36443296  
 H(0 K)= -3049.309476  
 G(298 K)= -3049.416602  
 SCF(C6H6) = -3050.37175381  
 BP86(D3BJ) = -3050.89489127  
 Low Freq. = 12.4244cm<sup>-1</sup>, 17.0004cm<sup>-1</sup>

137

C -2.69921 -2.47008 -3.07669  
 C -1.85806 -1.62197 -2.32489  
 C -0.88563 -0.79674 -2.97327  
 C -0.75333 -0.92881 -4.39313  
 C -1.55757 -1.81517 -5.11090  
 C -2.54252 -2.59246 -4.46271  
 P -2.06753 -1.25389 -0.52658  
 C -3.84478 -0.57942 -0.66486  
 C -4.95824 -1.08741 0.03279  
 C -6.25008 -0.59282 -0.21891  
 C -6.45174 0.42398 -1.16355  
 C -5.35021 0.92958 -1.87478  
 C -4.06475 0.42270 -1.63554  
 O -0.13541 0.06674 -2.31310  
 C -1.83018 2.90676 -1.85536  
 C -2.19023 3.04027 -0.49752  
 C -3.15547 4.01057 -0.14048  
 C -3.73976 4.83031 -1.11977  
 C -3.36848 4.69361 -2.46775  
 C -2.41426 3.73068 -2.83217  
 P -1.32239 1.87788 0.69773  
 C -0.41394 3.07352 1.86140  
 C 0.52982 2.54760 2.76955  
 C 1.12836 3.36440 3.74268  
 C 0.81567 4.72999 3.81116  
 C -0.09673 5.27267 2.89316  
 C -0.70901 4.45277 1.93136  
 Ru -0.07311 0.03066 -0.07289  
 P 1.19388 -1.97355 0.42691  
 C 0.89394 -3.58894 -0.50552  
 C 0.83439 -3.51829 -1.91427  
 C 0.68337 -4.67958 -2.68936  
 C 0.58580 -5.93404 -2.06560  
 C 0.63721 -6.01512 -0.66498  
 C 0.78749 -4.85301 0.10991  
 P 1.93868 1.33476 -0.57410  
 C 3.09702 2.00573 0.76977  
 C 3.47531 1.16182 1.84114  
 C 4.24239 1.62406 2.92149  
 C 4.71306 2.94555 2.92527  
 C 4.41745 3.78433 1.84112  
 C 3.61881 3.31821 0.78409  
 C 1.59984 2.89198 -1.59098  
 C 1.70847 2.85749 -2.99804  
 C 1.42918 3.99851 -3.76751  
 C 1.04907 5.19943 -3.14920  
 C 0.93011 5.24369 -1.75214  
 C 1.18925 4.09880 -0.98233  
 C 3.22715 0.57200 -1.73492  
 C 2.81348 -0.33432 -2.73261  
 C 3.72663 -0.80691 -3.68962

C 5.06508 -0.38647 -3.66113  
 C 5.48429 0.51354 -2.66911  
 C 4.57313 0.99295 -1.71458  
 C -2.44824 -2.85265 0.37088  
 C -2.84738 -2.76430 1.72469  
 C -3.21427 -3.91416 2.44081  
 C -3.17818 -5.17274 1.81855  
 C -2.76284 -5.27160 0.48232  
 C -2.39764 -4.12179 -0.23802  
 C 3.08415 -2.00209 0.33135  
 C 3.82732 -2.94155 -0.41159  
 C 5.23150 -2.93403 -0.40123  
 C 5.92140 -1.98508 0.36682  
 C 5.20740 -1.04119 1.11809  
 C 3.80487 -1.05734 1.08822  
 C 1.08413 -2.54924 2.22876  
 C 2.04206 -3.44594 2.75513  
 C 1.97520 -3.86658 4.09276  
 C 0.95162 -3.39683 4.93143  
 C -0.00267 -2.50567 4.41923  
 C 0.06497 -2.08733 3.07990  
 C -2.69001 1.43954 1.94010  
 C -4.06476 1.60309 1.67794  
 C -5.02558 1.30041 2.65981  
 C -4.63479 0.81636 3.91507  
 C -3.26784 0.62962 4.18249  
 C -2.30911 0.93760 3.20598  
 H 0.04518 0.03285 1.52062  
 H -1.10363 2.13605 -2.14330  
 H -4.40323 1.95433 0.70061  
 H -6.08633 1.43637 2.42517  
 H -5.38499 0.58537 4.67890  
 H -2.94244 0.25575 5.15960  
 H -1.25024 0.80386 3.44310  
 H 0.80142 1.48909 2.70171  
 H 1.85556 2.92892 4.43516  
 H 1.28622 5.36853 4.56639  
 H -0.34002 6.34054 2.92341  
 H -1.40968 4.90089 1.22279  
 H -3.46922 4.11910 0.90233  
 H -4.48985 5.57338 -0.82727  
 H -3.82580 5.33374 -3.23023  
 H -2.11985 3.61445 -3.88016  
 H -0.01067 -0.30174 -4.89850  
 H -1.43199 -1.89390 -6.19761  
 H -3.18633 -3.26792 -5.03452  
 H -3.49332 -3.03079 -2.57145  
 H -4.83316 -1.88285 0.77108  
 H -7.10091 -1.01236 0.32938  
 H -7.45916 0.80829 -1.35705  
 H -5.48702 1.71331 -2.62712  
 H -3.22709 0.79768 -2.22785  
 H -2.88957 -1.78647 2.21804  
 H -3.52679 -3.82420 3.48658  
 H -3.46554 -6.07098 2.37560  
 H -2.71322 -6.24937 -0.00835  
 H -2.05795 -4.21854 -1.27245  
 H 0.90229 -2.54875 -2.41193  
 H 0.62989 -4.59490 -3.77945  
 H 0.46626 -6.84158 -2.66728  
 H 0.55440 -6.98720 -0.16650  
 H 2.85737 -3.80884 2.12182  
 H 2.73185 -4.55780 4.47978  
 H 0.90315 -3.71952 5.97710  
 H -0.80504 -2.12789 5.06238  
 H -0.66471 -1.37570 2.68683  
 H 3.30037 -3.68885 -1.00990  
 H 5.78108 -3.67270 -0.99326  
 H 7.01621 -1.97539 0.38571  
 H 5.72782 -0.29087 1.71976  
 O 3.05016 -0.16506 1.85788  
 H 1.75579 -0.61096 -2.77142  
 H 3.38395 -1.50404 -4.46209  
 H 5.77711 -0.75524 -4.40747  
 H 6.52657 0.84920 -2.63469  
 H 3.39336 3.99344 -0.04473  
 H 4.80069 4.80944 1.81486

H 5.32020 3.30788 3.76132  
 H 4.46932 0.92960 3.73627  
 H 1.07349 4.15534 0.10193  
 H 0.62523 6.16899 -1.25184  
 H 0.84514 6.09176 -3.75055  
 H 1.52275 3.94551 -4.85772  
 H 2.01728 1.93813 -3.49970  
 H 0.81106 -4.93721 1.19927  
 H 4.91851 1.69975 -0.95478

5ctc

SCF = -3050.33158733  
 H(0 K) = -3049.279744  
 G(298 K) = -3049.388343  
 SCF(C6H6) = -3050.33852248  
 BP86(D3BJ) = -3050.84781805  
 Low Freq. = 10.0004cm<sup>-1</sup>, 19.3333cm<sup>-1</sup>

137

C -2.91003 -2.35761 -0.84305  
 C -2.06953 -2.08983 -1.94924  
 C -2.64943 -2.19594 -3.23296  
 C -4.00614 -2.51920 -3.40305  
 C -4.82618 -2.73050 -2.28380  
 C -4.27494 -2.64744 -0.99609  
 P -0.29182 -1.49366 -1.65630  
 Ru 0.05943 0.25248 -0.00360  
 P -0.04982 -1.18730 1.97327  
 C -0.62411 -2.98719 1.84393  
 C -1.72993 -3.30548 1.02495  
 C -2.18145 -4.62519 0.86006  
 C -1.52830 -5.66532 1.53450  
 C -0.43817 -5.38153 2.37035  
 C 0.00260 -4.05681 2.51903  
 O -2.40023 -2.23288 0.44777  
 P 2.25565 1.00485 -0.20400  
 C 2.50853 2.63800 -1.18773  
 C 1.54488 3.67360 -1.27787  
 C 1.81235 4.88839 -1.93712  
 C 3.06463 5.11752 -2.51775  
 C 4.03889 4.11083 -2.45437  
 C 3.75495 2.90115 -1.80488  
 O 0.24175 3.45354 -0.85668  
 C -0.27957 3.93374 0.32547  
 C -1.45020 3.26239 0.76673  
 C -2.08845 3.76590 1.91618  
 C -1.56969 4.86865 2.61965  
 C -0.38748 5.48266 2.18277  
 C 0.26446 5.01929 1.02841  
 P -1.92151 1.61967 -0.04913  
 C -3.64016 1.38407 0.73001  
 C -3.90646 0.27733 1.55424  
 C -5.17802 0.09868 2.12893  
 C -6.20007 1.02654 1.88432  
 C -5.94697 2.13540 1.05744  
 C -4.67980 2.31135 0.48327  
 C 3.20580 1.59506 1.33419  
 C 4.56669 1.97369 1.27108  
 C 5.22797 2.48049 2.39904  
 C 4.54061 2.62895 3.61519  
 C 3.19046 2.26066 3.69091  
 C 2.53330 1.74678 2.56010  
 C 3.57220 -0.02272 -1.08096  
 C 4.57572 -0.73215 -0.38430  
 C 5.45557 -1.58927 -1.06934  
 C 5.35069 -1.75210 -2.45963  
 C 4.35313 -1.05411 -3.16212  
 C 3.47084 -0.20341 -2.48091  
 C -2.57570 2.19098 -1.72700  
 C -2.48858 3.51735 -2.19583  
 C -3.03622 3.87450 -3.44071  
 C -3.68770 2.91590 -4.23146  
 C -3.79525 1.59564 -3.76444  
 C -3.24591 1.23847 -2.52410  
 H 0.10162 1.17448 -1.31176  
 H 0.27291 1.40637 1.10246



H 1.01164 5.63172 -1.99888  
H 3.26840 6.06438 -3.02833  
H 5.02047 4.25847 -2.91643  
H 4.52461 2.12528 -1.79485  
H -2.99413 3.27337 2.28069  
H -2.08837 5.23787 3.51034  
H 0.03199 6.33231 2.73192  
H 1.18203 5.49391 0.66948  
H -3.11956 -0.45488 1.73675  
H -5.36116 -0.76860 2.77242  
H -7.19093 0.88859 2.33100  
H -6.73982 2.86425 0.85550  
H -4.49838 3.17473 -0.16520  
H -2.00470 4.28359 -1.58538  
H -2.95783 4.91138 -3.78640  
H -4.11520 3.19668 -5.20006  
H -4.30943 0.83626 -4.36307  
H -3.34906 0.20891 -2.17034  
H 4.67559 -0.61242 0.69822  
H 6.23361 -2.12173 -0.51046  
H 6.03968 -2.41616 -2.99219  
H 4.25308 -1.17450 -4.24573  
H 2.69385 0.32468 -3.04270  
H 1.48053 1.46194 2.62311  
H 2.64007 2.36692 4.63156  
H 5.05602 3.02903 4.49505  
H 6.28322 2.76533 2.32367  
H 5.12246 1.87748 0.33471  
C 1.53855 -1.50108 2.95492  
C -1.13711 -0.61557 3.41031  
C 0.56432 -3.17570 -1.55240  
C 0.16406 -1.05231 -3.44080  
H -3.03822 -4.82374 0.20964  
H -1.87846 -6.69535 1.40884  
H 0.07416 -6.18718 2.90581  
H 0.85796 -3.84895 3.16710  
H -2.02928 -2.00408 -4.11328  
H -4.42219 -2.59355 -4.41326  
H -5.88948 -2.95969 -2.40787  
H -4.88539 -2.79567 -0.10063  
C -0.06778 -4.39223 -1.88454  
C 0.64652 -5.60192 -1.85694  
C 2.00635 -5.61368 -1.51037  
C 2.64756 -4.40678 -1.18939  
C 1.93030 -3.20030 -1.20610  
H -1.12310 -4.39886 -2.17212  
H 0.13506 -6.53692 -2.11100  
H 2.56274 -6.55710 -1.49265  
H 3.71094 -4.39536 -0.92858  
H 2.44040 -2.26264 -0.97026  
C -0.06304 0.26495 -3.89476  
C 0.26023 0.63863 -5.20916  
C 0.82526 -0.29628 -6.09218  
C 1.05337 -1.60985 -5.65293  
C 0.72178 -1.98686 -4.33992  
H -0.48734 1.00465 -3.20940  
H 0.07234 1.66621 -5.53779  
H 1.08569 -0.00294 -7.11499  
H 1.49151 -2.34966 -6.33219  
H 0.90603 -3.01488 -4.01547  
C -1.22576 0.76674 3.67596  
C -1.96598 1.24356 4.76914  
C -2.64875 0.34528 5.60488  
C -2.57917 -1.03236 5.34251  
C -1.82190 -1.51069 4.25957  
H -0.73132 1.47590 3.00366  
H -2.01819 2.32175 4.95412  
H -3.23621 0.71628 6.45162  
H -3.11018 -1.74233 5.98642  
H -1.76198 -2.58825 4.07751  
C 1.66248 -1.27382 4.34073  
C 2.87080 -1.54483 5.00692  
C 3.96690 -2.06593 4.30429  
C 3.85016 -2.30577 2.92486  
C 2.65177 -2.01367 2.25628  
H 0.81370 -0.88529 4.91011  
H 2.94814 -1.35265 6.08278

H 4.90507 -2.28402 4.82567  
H 4.69555 -2.72025 2.36457  
H 2.57002 -2.19919 1.18133

5ctc (from IRC)

SCF = -3050.32151335  
H(0 K)= -3049.269257  
G(298 K)= -3049.375825  
SCF(C6H6) = -3050.32849114  
BP86(D3BJ) = -3050.84033967  
Low Freq. = 17.4315cm<sup>-1</sup>, 21.2633cm<sup>-1</sup>

137

C 1.61804 2.58378 2.32761  
C 0.99622 1.50398 2.99603  
C 0.32064 1.79109 4.19850  
C 0.28054 3.09591 4.71746  
C 0.92208 4.14202 4.03712  
C 1.59962 3.89002 2.83478  
P 1.00586 -0.14930 2.10391  
Ru -0.08767 -0.28433 -0.06755  
P -0.18608 2.09740 -0.64824  
C 1.42412 3.06171 -0.93460  
C 2.42227 3.08045 0.06945  
C 3.61647 3.80163 -0.07862  
C 3.84856 4.53114 -1.25446  
C 2.88878 4.51405 -2.27648  
C 1.69490 3.79027 -2.11300  
O 2.30735 2.23440 1.17294  
P 1.51514 -1.20316 -1.55734  
C 1.62826 -3.07650 -1.27931  
C 0.46022 -3.85305 -1.03911  
C 0.55648 -5.15724 -0.52168  
C 1.81420 -5.74354 -0.31514  
C 2.97841 -5.03138 -0.62450  
C 2.87398 -3.70862 -1.08387  
O -0.75558 -3.25096 -1.36755  
C -1.94746 -3.65215 -0.76712  
C -2.69067 -2.74994 0.04705  
C -3.86563 -3.27437 0.63570  
C -4.32480 -4.57735 0.39639  
C -3.63425 -5.40169 -0.50132  
C -2.45146 -4.93121 -1.08347  
P -2.33165 -0.86650 0.18336  
C -3.47661 -0.30136 -1.21210  
C -3.94559 1.03085 -1.20900  
C -4.79957 1.49424 -2.22033  
C -5.18825 0.63977 -3.26478  
C -4.71390 -0.67973 -3.28794  
C -3.86818 -1.14855 -2.26760  
C 1.12276 -1.10780 -3.40170  
C 1.52936 0.03805 -4.12108  
C 1.27613 0.15010 -5.49652  
C 0.60663 -0.87955 -6.17847  
C 0.19220 -2.01865 -5.47132  
C 0.44977 -2.13405 -4.09409  
C 3.34803 -0.76240 -1.73080  
C 4.14143 -1.25245 -2.79565  
C 5.49147 -0.88944 -2.90497  
C 6.06827 -0.02481 -1.95752  
C 5.28657 0.47270 -0.90578  
C 3.93309 0.10682 -0.79517  
C -3.48980 -0.42316 1.63855  
C -4.89478 -0.31436 1.50646  
C -5.69613 0.04602 2.60191  
C -5.11131 0.30483 3.85248  
C -3.71846 0.20917 3.99535  
C -2.91875 -0.14461 2.89541  
H -0.01035 -1.81814 0.37682  
H -0.78345 -0.56213 -1.49642  
H -0.34694 -5.71873 -0.27868  
H 1.87069 -6.76282 0.08130  
H 3.96512 -5.48518 -0.48725  
H 3.78856 -3.13654 -1.25598  
H -4.45336 -2.63274 1.29571  
H -5.23880 -4.92797 0.88648

H -4.00699 -6.40043 -0.75106  
H -1.90064 -5.54441 -1.80218  
H -3.65287 1.71296 -0.40446  
H -5.15035 2.53096 -2.19554  
H -5.85384 1.00197 -4.05550  
H -5.00822 -1.35765 -4.09679  
H -3.52493 -2.18630 -2.29687  
H -5.36827 -0.50400 0.53865  
H -6.78133 0.12635 2.47434  
H -5.73691 0.58661 4.70630  
H -3.24744 0.41601 4.96222  
H -1.83303 -0.19034 3.00962  
H 3.70012 -1.91736 -3.54526  
H 6.09297 -1.27833 -3.73412  
H 7.12230 0.26081 -2.04535  
H 5.72371 1.14816 -0.16360  
H 3.32527 0.49595 0.02399  
H 0.12191 -3.02940 -3.56108  
H -0.32669 -2.83096 -5.99229  
H 0.41341 -0.79560 -7.25335  
H 1.60334 1.04598 -6.03496  
H 2.05767 0.84599 -3.60404  
C -1.11466 2.57676 -2.23648  
C -0.98842 3.35320 0.52629  
C 2.82457 -0.64925 2.31269  
C 0.44450 -1.34248 3.47167  
H 4.35763 3.76138 0.72550  
H 4.77957 5.09482 -1.37302  
H 3.06216 5.06749 -3.20531  
H 0.95099 3.79630 -2.91485  
H -0.18280 0.98284 4.73693  
H -0.25306 3.29247 5.65285  
H 0.89511 5.16069 4.43723  
H 2.09813 4.69259 2.28359  
C 3.79782 0.14501 2.94958  
C 5.10962 -0.33245 3.11799  
C 5.46227 -1.61306 2.66575  
C 4.49259 -2.41647 2.04356  
C 3.18656 -1.93742 1.86722  
H 3.53669 1.13806 3.32707  
H 5.85457 0.30010 3.61409  
H 6.48377 -1.98436 2.80118  
H 4.74910 -3.42071 1.68978  
H 2.44035 -2.57332 1.38009  
C -0.43652 -2.39886 3.17283  
C -0.77905 -3.35244 4.14743  
C -0.24749 -3.25982 5.44163  
C 0.64524 -2.21885 5.75034  
C 0.99808 -1.27842 4.77147  
H -0.84669 -2.47962 2.16137  
H -1.46459 -4.16624 3.88797  
H -0.51606 -3.99910 6.20398  
H 1.08083 -2.14643 6.75301  
H 1.72724 -0.49907 5.01534  
C -0.70364 4.73744 0.49578  
C -1.41732 5.63413 1.30686  
C -2.41811 5.16329 2.17304  
C -2.68737 3.78788 2.23412  
C -1.97337 2.89407 1.41839  
H 0.08336 5.11986 -0.16258  
H -1.18671 6.70456 1.26311  
H -2.97399 5.86436 2.80513  
H -3.44705 3.39879 2.92037  
H -2.16668 1.82046 1.48453  
C -1.66399 3.85882 -2.46624  
C -2.31023 4.15985 -3.67564  
C -2.41986 3.18651 -4.68206  
C -1.89080 1.90699 -4.46116  
C -1.25262 1.60567 -3.24693  
H -1.60013 4.63189 -1.69613  
H -2.72956 5.16079 -3.82798  
H -2.92297 3.42288 -5.62620  
H -1.97565 1.13012 -5.22726  
H -0.87050 0.59752 -3.07177

TS (5-9) ctc

SCF = -3050.28281141  
H(0 K)= -3049.233218  
G(298 K)= -3049.338271  
SCF(C6H6) = -3050.28988954  
BP86(D3BJ) = -3050.80803949  
Low Freq. = -233.4547cm<sup>-1</sup>, 20.6206cm<sup>-1</sup>

137

C 1.33714 -0.84879 3.36309  
C 0.64710 -1.92136 2.75258  
C -0.12230 -2.75712 3.58471  
C -0.19508 -2.53259 4.96987  
C 0.50989 -1.46496 5.54632  
C 1.28750 -0.61613 4.74376  
P 0.75013 -2.01287 0.88142  
Ru -0.09413 -0.03589 -0.36138  
P -0.18827 1.60411 1.35928  
C 1.46746 2.19428 2.06326  
C 2.35755 1.26362 2.65008  
C 3.56523 1.66148 3.24194  
C 3.91839 3.01929 3.25765  
C 3.06699 3.96182 2.66342  
C 1.85718 3.55076 2.07752  
O 2.12396 -0.10179 2.49560  
P 1.84179 0.77506 -1.61700  
C 1.79745 -0.48969 -2.96763  
C 0.53600 -1.22585 -2.99770  
C 0.59559 -2.53819 -3.59446  
C 1.75070 -2.99417 -4.23762  
C 2.90501 -2.19595 -4.33565  
C 2.91599 -0.95720 -3.66240  
O -0.65364 -0.38902 -3.49870  
C -1.84438 -1.07365 -3.54898  
C -2.70322 -1.23468 -2.42007  
C -3.87312 -2.01027 -2.60197  
C -4.21638 -2.56757 -3.84178  
C -3.38817 -2.35730 -4.95514  
C -2.20737 -1.62474 -4.79976  
P -2.38987 -0.34359 -0.77384  
C -3.36136 1.23872 -1.09561  
C -3.86789 1.98019 -0.00652  
C -4.60334 3.15551 -0.22106  
C -4.83240 3.61709 -1.52712  
C -4.31815 2.89600 -2.61512  
C -3.59011 1.71330 -2.40227  
C 1.64193 2.43574 -2.47291  
C 2.16076 3.61630 -1.89853  
C 1.99208 4.85426 -2.53883  
C 1.29920 4.92980 -3.75863  
C 0.77229 3.76006 -4.33070  
C 0.94128 2.51908 -3.69357  
C 3.67634 0.89800 -1.20537  
C 4.57879 1.55803 -2.07297  
C 5.95308 1.58335 -1.79020  
C 6.44793 0.95494 -0.63512  
C 5.55962 0.30274 0.23220  
C 4.18327 0.27544 -0.05038  
C -3.66486 -1.22955 0.32707  
C -5.05052 -0.95195 0.26324  
C -5.95945 -1.63642 1.08621  
C -5.50269 -2.61209 1.98758  
C -4.12986 -2.89341 2.06378  
C -3.22197 -2.20364 1.24276  
H 0.13280 -1.21731 -1.74207  
H -0.59258 1.13872 -1.32782  
H -0.29880 -3.16716 -3.58334  
H 1.73565 -3.99164 -4.69310  
H 3.79745 -2.55439 -4.85668  
H 3.85207 -0.39209 -3.59701  
H -4.54657 -2.16889 -1.75662  
H -5.13889 -3.15010 -3.93522  
H -3.65205 -2.77276 -5.93369  
H -1.51929 -1.46298 -5.63453  
H -3.70109 1.63449 1.01872  
H -4.98865 3.71451 0.63768  
H -5.40717 4.53420 -1.69454  
H -4.48980 3.24554 -3.63906

H -3.20884 1.15524 -3.26181  
H -5.42349 -0.19418 -0.43181  
H -7.02807 -1.40430 1.02093  
H -6.21242 -3.14505 2.62939  
H -3.75896 -3.64724 2.76618  
H -2.15252 -2.41203 1.32566  
H 4.20678 2.06051 -2.97107  
H 6.63727 2.09667 -2.47490  
H 7.52080 0.97585 -0.41442  
H 5.93254 -0.19627 1.13255  
H 3.50227 -0.24313 0.62629  
H 0.52372 1.60947 -4.13744  
H 0.23300 3.80900 -5.28317  
H 1.17368 5.89483 -4.26162  
H 2.40401 5.76113 -2.08281  
H 2.70888 3.56777 -0.95165  
C -0.95088 3.28706 0.91263  
C -1.05659 1.33859 3.02427  
C 2.52826 -2.62857 0.66685  
C -0.00286 -3.71195 0.51912  
H 4.22441 0.89443 3.65911  
H 4.86159 3.33223 3.71674  
H 3.33765 5.02271 2.65647  
H 1.19561 4.29777 1.63001  
H -0.66935 -3.59603 3.14410  
H -0.80159 -3.19415 5.59655  
H 0.45810 -1.28720 6.62528  
H 1.84097 0.22371 5.17356  
C 3.40467 -2.88728 1.73985  
C 4.69112 -3.40171 1.50126  
C 5.11435 -3.67188 0.19052  
C 4.24085 -3.42868 -0.88161  
C 2.95818 -2.91198 -0.64652  
H 3.08637 -2.69753 2.76936  
H 5.35930 -3.59815 2.34753  
H 6.11686 -4.07288 0.00640  
H 4.55093 -3.63248 -1.91157  
H 2.29173 -2.73751 -1.49707  
C -0.93241 -3.86138 -0.52643  
C -1.43816 -5.12753 -0.86914  
C -1.02046 -6.26537 -0.16468  
C -0.08137 -6.13296 0.87340  
C 0.43251 -4.87057 1.20333  
H -1.26240 -2.97891 -1.08226  
H -2.16017 -5.21497 -1.68779  
H -1.41443 -7.25309 -0.42719  
H 0.26309 -7.01778 1.41983  
H 1.19270 -4.78744 1.98683  
C -0.69563 2.04550 4.19470  
C -1.44236 1.90525 5.37517  
C -2.55556 1.04929 5.41277  
C -2.90952 0.32778 4.26333  
C -2.16277 0.47382 3.08216  
H 0.17120 2.71365 4.18644  
H -1.14988 2.46729 6.26918  
H -3.13614 0.94044 6.33520  
H -3.76294 -0.35830 4.27646  
H -2.43569 -0.10449 2.19800  
C -1.52066 4.14978 1.87661  
C -2.02437 5.40746 1.50867  
C -1.96819 5.83003 0.17107  
C -1.41566 4.97801 -0.79600  
C -0.91823 3.71737 -0.42849  
H -1.58173 3.84383 2.92391  
H -2.46271 6.05654 2.27502  
H -2.36004 6.81231 -0.11484  
H -1.36975 5.28276 -1.84591  
H -0.51293 3.05431 -1.19570

9ctc

SCF = -3050.37280812  
H(0 K)= -3049.317995  
G(298 K)= -3049.427141  
SCF(C6H6) = -3050.38010609  
BP86(D3BJ) = -3050.89111623  
Low Freq. = 14.5528cm-1, 16.3801cm-1

137

C -0.14532 -2.24328 2.99876  
C -0.16315 -2.98288 1.79347  
C -0.91084 -4.17285 1.75474  
C -1.66254 -4.58349 2.87188  
C -1.66878 -3.80094 4.03723  
C -0.90497 -2.62325 4.11417  
P 0.84973 -2.23188 0.40175  
Ru -0.02046 0.08021 -0.42175  
P -0.56627 1.26219 1.56066  
C 0.17789 1.13958 3.33320  
C 0.64393 -0.09378 3.83392  
C 1.13083 -0.24550 5.14404  
C 1.10896 0.84910 6.01809  
C 0.60391 2.07928 5.56856  
C 0.14791 2.21594 4.24871  
O 0.71817 -1.16297 2.95253  
P 2.05743 1.13441 -0.99169  
C 3.49792 0.16223 -1.76177  
C 3.28015 -1.08798 -2.38173  
C 4.34976 -1.79022 -2.96142  
C 5.64928 -1.26101 -2.93371  
C 5.87432 -0.01758 -2.32236  
C 4.80865 0.68943 -1.74199  
O 0.39754 -0.63536 -2.38227  
C -0.55270 -0.76813 -3.29361  
C -1.93467 -0.64543 -2.97460  
C -2.91725 -0.84159 -3.96943  
C -2.55432 -1.14564 -5.28539  
C -1.18387 -1.26030 -5.61069  
C -0.19814 -1.07798 -4.64241  
P -2.27857 -0.22529 -1.20682  
C -3.29155 1.35301 -1.36840  
C -4.32764 1.68273 -0.46848  
C -5.04186 2.88533 -0.61278  
C -4.72935 3.77476 -1.65326  
C -3.69393 3.45632 -2.54872  
C -2.98072 2.25579 -2.40762  
C 1.77710 2.38936 -2.36114  
C 1.04442 3.56478 -2.08631  
C 0.79602 4.50206 -3.09989  
C 1.25528 4.27080 -4.40773  
C 1.97079 3.09841 -4.69109  
C 2.23736 2.16578 -3.67362  
C 3.02139 2.12499 0.27952  
C 3.62271 3.37167 0.00558  
C 4.37337 4.03321 0.99230  
C 4.53867 3.45668 2.26245  
C 3.94471 2.21487 2.54410  
C 3.18646 1.55821 1.56136  
C -3.67235 -1.44662 -0.80450  
C -4.99157 -1.28324 -1.28540  
C -5.96985 -2.26135 -1.04462  
C -5.65309 -3.41727 -0.31293  
C -4.34883 -3.58673 0.17672  
C -3.37186 -2.60898 -0.07026  
H 2.26373 -1.48861 -2.42066  
H -0.50005 1.44929 -1.07679  
H 4.15868 -2.76060 -3.43196  
H 6.48180 -1.81324 -3.38313  
H 6.88321 0.40870 -2.29319  
H 5.00849 1.65324 -1.26505  
H -3.97731 -0.75540 -3.70917  
H -3.32287 -1.28946 -6.05123  
H -0.88757 -1.49747 -6.63936  
H 0.86457 -1.17134 -4.88723  
H -4.58483 1.00135 0.34777  
H -5.84326 3.12306 0.09488  
H -5.29217 4.70748 -1.76897  
H -3.44231 4.14037 -3.36630  
H -2.17925 2.01206 -3.11189  
H -5.26691 -0.38098 -1.83901  
H -6.98541 -2.11459 -1.42863  
H -6.41920 -4.17641 -0.12184  
H -4.08535 -4.47506 0.76066  
H -2.36341 -2.74752 0.32806

H 3.49670 3.83236 -0.97893  
H 4.83128 5.00210 0.76451  
H 5.12459 3.97395 3.02982  
H 4.05730 1.75918 3.53324  
H 2.70781 0.60236 1.79418  
H 2.80081 1.25894 -3.90767  
H 2.32781 2.90270 -5.70794  
H 1.05395 4.99952 -5.20039  
H 0.23519 5.41214 -2.86198  
H 0.66455 3.75194 -1.07826  
C -0.47456 3.13425 1.31005  
C -2.32795 1.08591 2.24284  
C 2.53843 -2.62981 1.19074  
C 0.77877 -3.60251 -0.89008  
H 1.52507 -1.21823 5.45302  
H 1.48174 0.73940 7.04163  
H 0.56497 2.93982 6.24443  
H -0.24346 3.18396 3.92634  
H -0.90828 -4.77598 0.84048  
H -2.23705 -5.51448 2.83035  
H -2.26242 -4.10953 4.90407  
H -0.89686 -2.01522 5.02261  
C 2.69133 -3.76058 2.02706  
C 3.93297 -4.07045 2.60269  
C 5.05152 -3.25712 2.35602  
C 4.91451 -2.13746 1.52411  
C 3.66928 -1.83099 0.94799  
H 1.83367 -4.40796 2.23262  
H 4.02372 -4.95259 3.24623  
H 6.02015 -3.49761 2.80745  
H 5.77444 -1.49303 1.31367  
H 3.59275 -0.96526 0.29150  
C -0.34915 -3.67392 -1.73523  
C -0.45540 -4.67119 -2.71718  
C 0.57741 -5.60639 -2.88654  
C 1.71498 -5.53360 -2.06770  
C 1.81647 -4.54211 -1.07753  
H -1.14832 -2.93465 -1.64421  
H -1.34111 -4.69879 -3.35988  
H 0.50073 -6.38024 -3.65797  
H 2.53237 -6.25204 -2.19514  
H 2.71142 -4.50283 -0.45152  
C -3.04246 2.14328 2.84588  
C -4.30600 1.91729 3.41341  
C -4.86989 0.62978 3.40362  
C -4.15674 -0.43221 2.82701  
C -2.89491 -0.20168 2.25304  
H -2.62118 3.15234 2.86479  
H -4.85177 2.75302 3.86531  
H -5.85737 0.45735 3.84512  
H -4.57928 -1.44181 2.80642  
H -2.34388 -1.03034 1.80233  
C -1.51258 3.77607 0.59706  
C -1.45591 5.15127 0.32034  
C -0.35479 5.91525 0.74032  
C 0.69100 5.28681 1.43276  
C 0.63400 3.91030 1.71354  
H -2.37711 3.20329 0.25340  
H -2.28051 5.61760 -0.22850  
H -0.31089 6.98874 0.52710  
H 1.56458 5.86164 1.75728  
H 1.46521 3.44797 2.25113

4. Small Model of cis-Ru(DPEphos)<sub>2</sub>H<sub>2</sub>

5ccc

SCF = -1201.99987247  
H(0 K) = -1201.588220  
G(298 K) = -1201.649536  
SCF(C6H6) = -1202.00529593  
BP86(D3BJ) = -1202.18062579  
Low Freq. = 19.6051cm<sup>-1</sup>, 22.9291cm<sup>-1</sup>

57

C 2.57760 -1.78376 -0.05606  
C 1.76961 -1.56215 1.08260

C 1.41339 -2.68664 1.85486  
C 1.83835 -3.97864 1.50485  
C 2.63067 -4.17103 0.36261  
C 3.00182 -3.06890 -0.42351  
P 1.11871 0.15545 1.46923  
H 0.49440 -0.21624 2.71930  
Ru 0.00004 1.60321 0.00007  
P -1.80744 1.97906 1.37133  
H -1.85875 1.40385 2.69773  
P 1.80741 1.97899 -1.37132  
H 2.07509 3.33193 -1.77381  
H 1.85853 1.40370 -2.69770  
C 3.52263 1.57034 -0.77874  
C 3.82843 0.22510 -0.48697  
C 5.03425 -0.13916 0.13145  
C 5.96357 0.86263 0.45340  
C 5.69149 2.20770 0.15392  
C 4.47528 2.55543 -0.45675  
P -1.11845 0.15530 -1.46909  
H -0.49386 -0.21649 -2.71899  
C -1.76953 -1.56225 -1.08249  
C -1.41337 -2.68679 -1.85469  
C -1.83859 -3.97872 -1.50472  
C -2.63109 -4.17097 -0.36259  
C -3.00216 -3.06878 0.42349  
C -2.57769 -1.78371 0.05607  
H -2.32399 0.66587 -2.07708  
H 2.32439 0.66607 2.07689  
H -2.07509 3.33203 1.77372  
C -3.52262 1.57046 0.77860  
C -3.82844 0.22522 0.48684  
C -5.03423 -0.13901 -0.13164  
C -5.96351 0.86279 -0.45365  
C -5.69142 2.20786 -0.15417  
C -4.47523 2.55557 0.45656  
H -0.65942 2.85080 -0.82618  
H 0.65944 2.85084 0.82632  
H 5.23618 -1.19231 0.34896  
H 6.90695 0.58603 0.93548  
H 6.42013 2.98585 0.40174  
H 4.25239 3.60683 -0.67023  
H -0.78444 -2.54659 -2.74095  
H -1.54559 -4.83347 -2.12277  
H -2.96216 -5.17566 -0.08059  
H -3.61320 -3.18536 1.32376  
O -2.89210 -0.71945 0.90797  
H -5.23618 -1.19216 -0.34915  
H -6.90688 0.58620 -0.93576  
H -4.25232 3.60697 0.67002  
H 0.78461 -2.54634 2.74121  
H 1.54531 -4.83334 2.12295  
H 2.96155 -5.17577 0.08058  
H 3.61274 -3.18558 -1.32385  
O 2.89208 -0.71959 -0.90805  
H -6.42003 2.98603 -0.40203

TS(5-9)ccc

SCF = -1201.93459417  
H(0 K) = -1201.525703  
G(298 K) = -1201.586308  
SCF(C6H6) = -1201.94040354  
BP86(D3BJ) = -1202.11669541  
Low Freq. = -234.6537cm<sup>-1</sup>, 19.3151cm<sup>-1</sup>

57

C 3.77640 -0.77900 -0.12823  
C 3.11997 -2.00692 -0.35025  
C 3.64918 -3.16539 0.25089  
C 4.79585 -3.09378 1.05853  
C 5.42311 -1.85570 1.27673  
C 4.91859 -0.68872 0.68079  
P 1.49070 -1.98119 -1.24197  
H 1.94500 -1.61386 -2.56392  
Ru -0.29766 -0.96070 -0.26938  
P -1.96635 -2.38898 -1.11281  
H -2.44865 -2.37142 -2.47769

P 0.96647 0.19683 1.27251  
H 1.86767 -0.57690 2.08347  
H 0.26340 0.82903 2.35651  
C 2.09018 1.63884 0.87870  
C 3.09206 1.52540 -0.11299  
C 3.87207 2.62478 -0.49961  
C 3.66829 3.86897 0.11771  
C 2.68862 4.00536 1.11359  
C 1.90714 2.89889 1.48440  
P -0.66518 0.82151 -1.77750  
H -1.31909 0.61345 -3.04803  
C -1.72853 2.13917 -1.03926  
C -1.34324 3.48867 -0.91596  
C -2.17940 4.40592 -0.26064  
C -3.40704 3.97577 0.27572  
C -3.80268 2.63586 0.16265  
C -2.96660 1.70332 -0.49371  
H 0.39325 1.66063 -2.28565  
H 1.40090 -3.39979 -1.49339  
H -1.80860 -3.81516 -1.01120  
C -3.36218 -1.98333 -0.01065  
C -3.17098 -0.63934 0.51857  
C -3.94159 -0.31025 1.68761  
C -4.89271 -1.20496 2.18993  
C -5.13815 -2.45464 1.58820  
C -4.34343 -2.83843 0.48810  
H -1.91969 -0.46706 0.63677  
H -0.25391 -2.11608 0.89587  
H 4.62364 2.48870 -1.28297  
H 4.27672 4.72852 -0.18102  
H 2.52594 4.97273 1.59896  
H 1.13153 3.01639 2.24916  
H -0.39119 3.82417 -1.34209  
H -1.88154 5.45665 -0.18210  
H -4.06682 4.69433 0.77420  
H -4.76638 2.29214 0.54861  
O -3.34544 0.40639 -0.68355  
H -3.79641 0.66424 2.16443  
H -5.47262 -0.90829 3.07225  
H -4.44345 -3.84633 0.06677  
H 3.14860 -4.12765 0.09670  
H 5.19435 -4.00192 1.52121  
H 6.31434 -1.79453 1.90952  
H 5.40148 0.28140 0.83232  
O 3.26157 0.32626 -0.81084  
H -5.88452 -3.13908 2.00065

5cct

SCF = -1201.98085177  
H(0 K) = -1201.569827  
G(298 K) = -1201.631331  
SCF(C6H6) = -1201.98812535  
BP86(D3BJ) = -1202.15785058  
Low Freq. = 16.0201cm-1, 17.8416cm-1

57

C 3.38607 -2.66706 -1.96155  
C 2.99180 -2.00388 -0.78432  
C 3.94838 -1.22464 -0.10239  
C 5.26082 -1.08450 -0.57909  
C 5.62890 -1.74736 -1.76032  
C 4.69779 -2.54353 -2.44843  
P 1.23271 -1.94153 -0.18147  
H 0.76927 -3.12616 -0.87175  
O 3.53266 -0.65924 1.10369  
C 3.81129 0.68761 1.34922  
C 3.16129 1.69776 0.60424  
C 3.42229 3.03797 0.95332  
C 4.28763 3.36157 2.01128  
C 4.90677 2.33854 2.74592  
C 4.66985 0.99532 2.41397  
P 1.89697 1.25751 -0.70580  
Ru 0.00000 -0.00001 -0.37472  
P -1.89696 -1.25755 -0.70580  
C -3.16128 -1.69777 0.60425  
C -3.42231 -3.03798 0.95333

C -4.28767 -3.36155 2.01127  
C -4.90683 -2.33852 2.74588  
C -4.66988 -0.99530 2.41393  
C -3.81129 -0.68761 1.34920  
O -3.53264 0.65924 1.10366  
C -3.94836 1.22466 -0.10240  
C -2.99179 2.00389 -0.78433  
C -3.38606 2.66709 -1.96155  
C -4.69779 2.54358 -2.44841  
C -5.62889 1.74741 -1.76031  
C -5.26082 1.08453 -0.57908  
P -1.23269 1.94151 -0.18149  
H -0.76925 3.12614 -0.87177  
H -1.40139 2.56570 1.10355  
H 1.40143 -2.56571 1.10357  
H -2.79978 -0.81523 -1.73404  
H 2.79978 0.81517 -1.73403  
H -1.72271 -2.60116 -1.20122  
H 1.72272 2.60112 -1.20124  
H 0.00009 -0.00005 -2.07616  
H -0.00007 -0.00002 1.29859  
H 2.92996 3.84126 0.39294  
H 4.47084 4.41086 2.26363  
H 5.57591 2.58183 3.57746  
H 5.13272 0.17586 2.97187  
H 5.97534 -0.46756 -0.02575  
H 6.65094 -1.64457 -2.13936  
H 4.98987 -3.06305 -3.36640  
H 2.65457 -3.27128 -2.50934  
H -2.92996 -3.84127 0.39297  
H -4.47090 -4.41084 2.26363  
H -5.57599 -2.58179 3.57741  
H -5.13276 -0.17583 2.97182  
H -2.65456 3.27131 -2.50934  
H -4.98987 3.06311 -3.36638  
H -6.65095 1.64464 -2.13933  
H -5.97534 0.46759 -0.02574

TS(5-9)cct

SCF = -1201.92582482  
H(0 K) = -1201.517891  
G(298 K) = -1201.578637  
SCF(C6H6) = -1201.93188774  
BP86(D3BJ) = -1202.10867360  
Low Freq. = -753.6418cm-1, 17.3887cm-1

57

C -4.55794 0.42379 -2.34125  
C -3.43580 0.69597 -1.53489  
C -3.60969 0.93261 -0.14932  
C -4.89232 0.85841 0.42764  
C -5.99992 0.58248 -0.38755  
C -5.83925 0.37471 -1.76980  
P -1.68174 0.59014 -2.11426  
H -1.94215 0.23731 -3.48789  
O -2.50029 1.30724 0.57016  
C -1.91468 0.32246 1.54009  
C -2.37714 -1.06141 1.56020  
C -2.61623 -1.72484 2.77088  
C -2.43097 -1.08187 4.00843  
C -1.95842 0.24674 4.00700  
C -1.72905 0.94542 2.81942  
P -1.96542 -1.91688 -0.00644  
Ru -0.17408 -0.65216 -0.85353  
P 1.53226 0.71070 -1.57914  
C 2.36032 1.97347 -0.47442  
C 2.32075 3.34855 -0.78123  
C 2.84876 4.30689 0.09909  
C 3.42435 3.90023 1.31266  
C 3.48243 2.53622 1.63883  
C 2.96036 1.58969 0.74632  
O 2.95770 0.25039 1.14264  
C 3.73321 -0.66358 0.43012  
C 3.10201 -1.87747 0.09104  
C 3.86281 -2.87270 -0.55082  
C 5.21603 -2.65226 -0.85598

|   |          |          |          |
|---|----------|----------|----------|
| C | 5.81906  | -1.42744 | -0.52382 |
| C | 5.08196  | -0.42468 | 0.12537  |
| P | 1.26774  | -2.00011 | 0.34868  |
| H | 1.14952  | -3.42623 | 0.17321  |
| H | 1.21016  | -2.01302 | 1.79026  |
| H | -1.37323 | 1.97839  | -2.36673 |
| H | 2.70947  | 0.11200  | -2.15633 |
| H | -3.17355 | -2.10845 | -0.76921 |
| H | 1.26815  | 1.62117  | -2.66674 |
| H | -1.81530 | -3.29101 | 0.40906  |
| H | 0.12632  | -1.60429 | -2.15364 |
| H | -0.69002 | 0.21841  | 0.70594  |
| H | -2.89418 | -2.78620 | 2.74579  |
| H | -2.60986 | -1.61541 | 4.94602  |
| H | -1.80053 | 0.76630  | 4.95970  |
| H | -1.42439 | 1.99638  | 2.83935  |

|   |          |          |          |
|---|----------|----------|----------|
| H | -5.00120 | 1.03466  | 1.50134  |
| H | -6.99940 | 0.53663  | 0.05798  |
| H | -6.71036 | 0.16910  | -2.40010 |
| H | -4.42811 | 0.24131  | -3.41405 |
| H | 1.85790  | 3.67393  | -1.71976 |
| H | 2.80214  | 5.36892  | -0.16139 |
| H | 3.82985  | 4.64175  | 2.00831  |
| H | 3.91835  | 2.18869  | 2.58012  |
| H | 3.38688  | -3.81971 | -0.82769 |
| H | 5.79588  | -3.43317 | -1.35754 |
| H | 6.87239  | -1.25048 | -0.76433 |
| H | 5.53905  | 0.53071  | 0.40006  |

## References

- 1 M. K. Cybulski, J. E. Nicholls, J. P. Lowe, M. F. Mahon, M. K. Whittlesey, *Organometallics* **2017**, *36*, 2308-2316.
- 2 R. Young, G. Wilkinson, *Inorg. Synth.* **1990**, *28*, 337-338.
- 3 G. M. Sheldrick, *Acta Cryst.* **2015**, *C71*, 3–8.
- 4 O. V. Dolomanov, L. J. Bourhis, R. J. Gildea, J. A. K. Howard, H. Puschmann, *J. Appl. Cryst.* **2009**, *42*, 339–341.
- 5 Gaussian 09, Revision D.01: M. J. Frisch, G. W. Trucks, H. B. Schlegel, G. E. Scuseria, M. A. Robb, J. R. Cheeseman, G. Scalmani, V. Barone, B. Mennucci, G. A. Petersson, H. Nakatsuji, M. Caricato, X. Li, H. P. Hratchian, A. F. Izmaylov, J. Bloino, G. Zheng, J. L. Sonnenberg, M. Hada, M. Ehara, K. Toyota, R. Fukuda, J. Hasegawa, M. Ishida, T. Nakajima, Y. Honda, O. Kitao, H. Nakai, T. Vreven, J. A. Montgomery, J. E. Peralta, F. Ogliaro, M. Bearpark, J. J. Heyd, E. Brothers, K. N. Kudin, V. N. Staroverov, R. Kobayashi, J. Normand, K. Raghavachari, A. Rendell, J. C. Burant, S. S. Iyengar, J. Tomasi, M. Cossi, N. Rega, J. M. Millam, M. Klene, J. E. Knox, J. B. Cross, V. Bakken, C. Adamo, J. Jaramillo, R. Gomperts, R. E. Stratmann, O. Yazyev, A. J. Austin, R. Cammi, C. Pomelli, J. W. Ochterski, R. L. Martin, K. Morokuma, V. G. Zakrzewski, G. A. Voth, P. Salvador, J. J. Dannenberg, S. Dapprich, A. D. Daniels, O. Farkas, J. B. Foresman, J. V. Ortiz, J. Cioslowski, D. J. Fox, Wallingford CT, 2013.
- 6 D. Andrae, U. Häußermann, M. Dolg, H. Stoll, H. Preuß, *Theor. Chim. Acta.* **1990**, *77*, 123-141.
- 7 a) W. J. Hehre, R. Ditchfield, J. A. Pople, *J. Chem. Phys.* **1972**, *56*, 2257-2261; b) P. C. Hariharan, J. A. Pople, *Theor. Chim. Acta.* **1973**, *28*, 213-222.

- 8 A. Hollwarth, M. Bohme, S. Dapprich, A. W. Ehlers, A. Gobbi, V. Jonas, K. F. Kohler, R. Stegmann, A. Veldkamp, G. Frenking, *Chem. Phys. Lett.* **1993**, *208*, 237-240.
- 9 a) A. D. Becke, *Phys. Rev. A* **1988**, *38*, 3098-3100; b) J. P. Perdew, *Phys. Rev. B* **1986**, *33*, 8822-8824.
- 10 J. Tomasi, B. Mennucci, R. Cammi, *Chem. Rev.* **2005**, *105*, 2999-3094.
- 11 S. Grimme, S. Ehrlich, L. Goerigk, *J. Comput. Chem.* **2011**, *32*, 1456-1465.
- 12 NBO 6.0.: E. D. Glendening, J. K. Badenhoop, A. E. Reed, J. E. Carpenter, J. A. Bohmann, C. M. Morales, C. R. Landis, F. Weinhold, Theoretical Chemistry Institute, University of Wisconsin, Madison, WI., 2013.
- 13 Chemcraft version 1.7 see <http://www.chemcraftprog.com>.
- 14 C. F. Macrae, I. J. Bruno, J. A. Chisholm, P. R. Edgington, P. McCabe, E. Pidcock, L. Rodriguez-Monge, R. Taylor, J. van de Streek, P. A. Wood, *J. Appl. Crystallogr.* **2008**, *41*, 466-470.
- 15 L. J. L. Häller, M. J. Page, S. Erhardt, S. A. Macgregor, M. F. Mahon, M. A. Naser, A. Vélez, M. K. Whittlesey, *J. Am. Chem. Soc.* **2010**, *132*, 18408-18416.
- 16 a) P. Ren, J. W. Ponder, *J. Phys. Chem. B* **2003**, *107*, 5933-5947; b) P. Ren, J. W. Ponder, *J. Comput. Chem.* **2002**, *23*, 1497-1506; c) R. V. Pappu, R. K. Hart, J. W. Ponder, *J. Phys. Chem. B* **1998**, *102*, 9725-9742.
- 17 D. Beeman, *J. Comput. Phys.* **1976**, *20*, 130-139.
- 18 H. J. C. Berendsen, J. P. M. Postma, W. F. van Gunsteren, A. DiNola, J. R. Haak, *J. Chem. Phys.* **1984**, *81*, 3684-3690.
- 19 P. J. Hay, W. R. Wadt, *J. Chem. Phys.* **1985**, *82*, 299-310.
